# Supplementary material for: Molecular architecture of the human tRNA ligase complex
Source: eLife. 2021 Dec 2;10:e71656. doi: 10.7554/eLife.71656 (PMC8668186; doi:10.7554/eLife.71656)
Supplement: Figure 2—source data 1. [file elife-71656-fig2-data1.xlsx]

## Sheet: Replicate 1
Id	Protein1	Protein2	XLType	Spectrum	AbsPos1	AbsPos2	deltaAA	Mr	Mz	z	Error_rel[ppm]	TIC	deltaS	ld-Score
INEAIVAVQAIIADPKTDHR-VKTDDIAR-a16-b2	pr|PROT04|CGI-99	pr|PROT03|FAM98B	inter-protein xl	mfaini_C1912_077.c.06562.06562.5_mfaini_C1912_077.c.06542.06542.5	234	245		3227.76	646.559	5	1.4	0.48	0.42	48.51
VASPKLVMEEAPESYK-MHNQIPQVTSDGKR-a5-b13	pr|PROT01|HSPC117	pr|PROT02|DDX1	inter-protein xl	mfaini_C1912_074.c.04479.04479.5_mfaini_C1912_074.c.04464.04464.5	465	399		3524.77	705.961	5	0.8	0.46	0.53	44.87
LTALDYHNPAGFNCKDETEFR-ZSNAAGDVGGR-a15-b1	pr|PROT04|CGI-99	pr|PROT05|Ashwin	inter-protein xl	mfaini_C1912_077.c.05023.05023.4_mfaini_C1912_077.c.05021.05021.4	20	-2		3537.62	885.413	4	-0.9	0.54	0.13	44.84
ZSNAAGDVGGR-FFEKYLR-a1-b4	pr|PROT05|Ashwin	pr|PROT04|CGI-99	inter-protein xl	mfaini_C1912_076.c.04903.04903.3_mfaini_C1912_076.c.04875.04875.3	-2	62		2042.02	681.682	3	0.1	0.5	0	43.49
ZSNAAGDVGGR-KQNLER-a1-b1	pr|PROT05|Ashwin	pr|PROT02|DDX1	inter-protein xl	mfaini_C1912_076.c.00965.00965.3_mfaini_C1912_076.c.00933.00933.3	-2	555		1826.92	609.982	3	0	0.45	0.82	43.39
ZSNAAGDVGGR-ILKGEYAVR-a1-b3	pr|PROT05|Ashwin	pr|PROT02|DDX1	inter-protein xl	mfaini_C1912_076.c.02987.02987.3_mfaini_C1912_076.c.02960.02960.3	-2	493		2088.09	697.04	3	-0.5	0.5	0.38	42.04
TDDVHAKDNTRPGANSPEMWSEAIK-ZSNAAGDVGGR-a7-b1	pr|PROT02|DDX1	pr|PROT05|Ashwin	inter-protein xl	mfaini_C1912_077.c.03754.03754.4_mfaini_C1912_077.c.03794.03794.4	472	-2		3808.78	953.202	4	1.6	0.53	0.39	40.78
ANQTKEGLPVALDK-NHVGKPLLK-a5-b5	pr|PROT04|CGI-99	pr|PROT03|FAM98B	inter-protein xl	mfaini_C1912_077.c.03419.03419.4_mfaini_C1912_077.c.03364.03364.4	176	192		2625.48	657.379	4	-0.7	0.39	0.82	40.11
AAGGGSYKGHVDILAPTVQELAALEK-ZSNAAGDVGGR-a8-b1	pr|PROT02|DDX1	pr|PROT05|Ashwin	inter-protein xl	mfaini_C1912_074.c.07513.07513.3_mfaini_C1912_074.c.07500.07500.3	702	-2		3634.86	1212.63	3	-0.5	0.44	0.22	39.29
LDDLVSTGKLNLSQVR-VASPKLVMEEAPESYK-a9-b5	pr|PROT02|DDX1	pr|PROT01|HSPC117	inter-protein xl	mfaini_C1912_076.c.07260.07260.4_mfaini_C1912_076.c.07258.07258.4	358	465		3671.93	918.991	4	0.1	0.43	0.64	39.16
VASPKLVMEEAPESYK-LGKSHIR-a5-b3	pr|PROT01|HSPC117	pr|PROT02|DDX1	inter-protein xl	mfaini_C1912_076.c.03508.03508.4_mfaini_C1912_076.c.03489.03489.4	465	461		2724.45	682.12	4	-1.9	0.37	0.86	39.06
LTQDAVAKANQTK-IYQPKR-a8-b5	pr|PROT04|CGI-99	pr|PROT03|FAM98B	inter-protein xl	mfaini_C1912_077.c.01695.01695.4_mfaini_C1912_077.c.01660.01660.4	171	256		2328.28	583.078	4	-0.4	0.46	0.48	38.87
ZSNAAGDVGGR-LGKSHIR-a1-b3	pr|PROT05|Ashwin	pr|PROT02|DDX1	inter-protein xl	mfaini_C1912_076.c.00724.00724.3_mfaini_C1912_076.c.00703.00703.3	-2	461		1849.97	617.665	3	-1.7	0.49	0.88	38.79
KRPLIVFDGSSTSTSIK-IYQPKR-a1-b5	pr|PROT05|Ashwin	pr|PROT03|FAM98B	inter-protein xl	mfaini_C1912_075.c.03588.03588.4_mfaini_C1912_075.c.03625.03625.4	98	256		2776.54	695.144	4	-1.7	0.44	0.41	38.68
ANQTKEGLPVALDK-KMGIDHK-a5-b1	pr|PROT04|CGI-99	pr|PROT01|HSPC117	inter-protein xl	mfaini_C1912_074.c.02911.02911.3_mfaini_C1912_074.c.02905.02905.3	176	245		2448.3	817.106	3	-3.7	0.36	0.75	38.46
EQLAQAMFDHIPVGVGSKGVIPMNAK-ZSNAAGDVGGR-a18-b1	pr|PROT01|HSPC117	pr|PROT05|Ashwin	inter-protein xl	mfaini_C1912_074.c.07749.07749.4_mfaini_C1912_074.c.07763.07763.4	158	-2		3776.89	945.232	4	-0.7	0.41	0.34	38.45
KGHQFSCVCLHGDR-ZSNAAGDVGGR-a1-b1	pr|PROT02|DDX1	pr|PROT05|Ashwin	inter-protein xl	mfaini_C1912_074.c.01734.01734.4_mfaini_C1912_074.c.01701.01701.4	536	-2		2740.26	686.072	4	0.3	0.54	0.26	38.41
LTQDAVAKANQTK-DILSKVQK-a8-b5	pr|PROT04|CGI-99	pr|PROT03|FAM98B	inter-protein xl	mfaini_C1912_075.c.03823.03823.3_mfaini_C1912_075.c.03797.03797.3	171	184		2454.37	819.132	3	1.8	0.52	0.37	37.95
ANQTKEGLPVALDK-EDLSKIIR-a5-b5	pr|PROT04|CGI-99	pr|PROT03|FAM98B	inter-protein xl	mfaini_C1912_074.c.05538.05538.3_mfaini_C1912_074.c.05516.05516.3	176	280		2593.43	865.486	3	0.7	0.38	0.41	37.78
VKTDDIAR-LGKVGR-a2-b3	pr|PROT03|FAM98B	pr|PROT04|CGI-99	inter-protein xl	mfaini_C1912_077.c.01424.01424.3_mfaini_C1912_077.c.01219.01219.3	245	241		1682.97	561.997	3	0.1	0.43	0.7	37.78
WGKMMEK-LGKVGR-a3-b3	pr|PROT05|Ashwin	pr|PROT04|CGI-99	inter-protein xl	mfaini_C1912_076.c.02441.02441.3_mfaini_C1912_076.c.02397.02397.3	72	241		1674.89	559.306	3	-0.6	0.31	0.63	37.54
LKPPPQASFTSNAFR-LGKVGR-a2-b3	pr|PROT05|Ashwin	pr|PROT04|CGI-99	inter-protein xl	mfaini_C1912_076.c.03847.03847.4_mfaini_C1912_076.c.03826.03826.4	127	241		2426.35	607.594	4	1.1	0.43	0.89	37.53
ZSNAAGDVGGR-GKGCYNTR-a1-b2	pr|PROT05|Ashwin	pr|PROT02|DDX1	inter-protein xl	mfaini_C1912_075.c.01040.01040.3_mfaini_C1912_075.c.01013.01013.3	-2	636		1994.92	665.981	3	-1.9	0.45	0.75	37.51
MLQADPNKVSAR-VTYGQKR-a8-b6	pr|PROT01|HSPC117	pr|PROT02|DDX1	inter-protein xl	mfaini_C1912_077.c.01987.01987.4_mfaini_C1912_077.c.01975.01975.4	206	693		2317.22	580.313	4	-0.4	0.52	0.54	37.48
ZSNAAGDVGGR-AIKEHK-a1-b3	pr|PROT05|Ashwin	pr|PROT02|DDX1	inter-protein xl	mfaini_C1912_076.c.00515.00515.3_mfaini_C1912_076.c.00517.00517.3	-2	502		1764.91	589.31	3	-2.8	0.53	0	37.42
ZSNAAGDVGGR-EVKEWHGCR-a1-b3	pr|PROT05|Ashwin	pr|PROT02|DDX1	inter-protein xl	mfaini_C1912_075.c.01775.01775.3_mfaini_C1912_075.c.01744.01744.3	-2	117		2240.04	747.687	3	-0.4	0.36	0	37.39
IYQPKR-LGKVGR-a5-b3	pr|PROT03|FAM98B	pr|PROT04|CGI-99	inter-protein xl	mfaini_C1912_076.c.00999.00999.4_mfaini_C1912_076.c.00866.00866.4	256	241		1569.93	393.492	4	-0.2	0.41	0	37.34
EHKMDQAIIFCR-ZSNAAGDVGGR-a3-b1	pr|PROT02|DDX1	pr|PROT05|Ashwin	inter-protein xl	mfaini_C1912_075.c.04048.04048.3_mfaini_C1912_075.c.04017.04017.3	505	-2		2587.22	863.416	3	-0.8	0.35	0	37.3
KLTALDYHNPAGFNCKDETEFR-ZSNAAGDVGGR-a16-b1	pr|PROT04|CGI-99	pr|PROT05|Ashwin	inter-protein xl	mfaini_C1912_074.c.04431.04431.4_mfaini_C1912_074.c.04407.04407.4	20	-2		3665.71	917.435	4	-2.3	0.49	0.4	37.18
HDDYLVMLKAIR-IYQPKR-a9-b5	pr|PROT04|CGI-99	pr|PROT03|FAM98B	inter-protein xl	mfaini_C1912_076.c.05587.05587.4_mfaini_C1912_076.c.05577.05577.4	154	256		2414.32	604.587	4	0.6	0.67	0.74	37.06
VKTDDIAR-HYKIEDR-a2-b3	pr|PROT03|FAM98B	pr|PROT04|CGI-99	inter-protein xl	mfaini_C1912_074.c.01379.01379.3_mfaini_C1912_074.c.01314.01314.3	245	41		2014.05	672.356	3	-1.5	0.49	0.64	37
ZSNAAGDVGGR-VKTDDIAR-a1-b2	pr|PROT05|Ashwin	pr|PROT03|FAM98B	inter-protein xl	mfaini_C1912_077.c.01843.01843.3_mfaini_C1912_077.c.01820.01820.3	-2	245		1956.98	653.336	3	-0.5	0.45	0.2	36.97
ZSNAAGDVGGR-LGKVGR-a1-b3	pr|PROT05|Ashwin	pr|PROT04|CGI-99	inter-protein xl	mfaini_C1912_077.c.01567.01567.3_mfaini_C1912_077.c.01523.01523.3	-2	241		1668.89	557.305	3	1.1	0.55	0	36.97
LKPPPQASFTSNAFR-VKTDDIAR-a2-b2	pr|PROT05|Ashwin	pr|PROT03|FAM98B	inter-protein xl	mfaini_C1912_077.c.04098.04098.4_mfaini_C1912_077.c.04069.04069.4	127	245		2714.44	679.617	4	-0.9	0.46	0.29	36.82
KGHQFSCVCLHGDR-DKIIVNDR-a1-b2	pr|PROT02|DDX1	pr|PROT01|HSPC117	inter-protein xl	mfaini_C1912_074.c.02264.02264.4_mfaini_C1912_074.c.02253.02253.4	536	285		2809.38	703.353	4	1.6	0.42	0.57	36.8
ZSNAAGDVGGR-VTYGQKR-a1-b6	pr|PROT05|Ashwin	pr|PROT02|DDX1	inter-protein xl	mfaini_C1912_075.c.01409.01409.3_mfaini_C1912_075.c.01242.01242.3	-2	693		1890.95	631.325	3	-2	0.48	0.3	36.75
EHKMDQAIIFCR-DKIIVNDR-a3-b2	pr|PROT02|DDX1	pr|PROT01|HSPC117	inter-protein xl	mfaini_C1912_076.c.04531.04531.4_mfaini_C1912_076.c.04508.04508.4	505	285		2656.35	665.095	4	0.3	0.39	0.76	36.66
LTQDAVAKANQTK-ZSNAAGDVGGR-a8-b1	pr|PROT04|CGI-99	pr|PROT05|Ashwin	inter-protein xl	mfaini_C1912_076.c.01962.01962.3_mfaini_C1912_076.c.01950.01950.3	171	-2		2427.24	810.088	3	1.9	0.45	0.36	36.39
LTALDYHNPAGFNCKDETEFR-GKGCYNTR-a15-b2	pr|PROT04|CGI-99	pr|PROT02|DDX1	inter-protein xl	mfaini_C1912_077.c.04231.04231.4_mfaini_C1912_077.c.04199.04199.4	20	636		3589.64	898.418	4	1.1	0.5	0.1	36.35
LTQDAVAKANQTK-EKTACAINK-a8-b2	pr|PROT04|CGI-99	pr|PROT03|FAM98B	inter-protein xl	mfaini_C1912_076.c.01561.01561.4_mfaini_C1912_076.c.01560.01560.4	171	292		2558.34	640.593	4	1.4	0.28	0.46	36.23
LEYGDNAEKYK-HKNSQLDK-a9-b2	pr|PROT04|CGI-99	pr|PROT03|FAM98B	inter-protein xl	mfaini_C1912_077.c.01075.01075.3_mfaini_C1912_077.c.01057.01057.3	98	136		2435.19	812.739	3	-1.6	0.53	0.75	35.91
EQHEIKNETK-FFEKYLR-a6-b4	pr|PROT05|Ashwin	pr|PROT04|CGI-99	inter-protein xl	mfaini_C1912_076.c.03011.03011.5_mfaini_C1912_076.c.02990.02990.5	84	62		2394.22	479.852	5	0.5	0.23	0.47	35.83
KRPLIVFDGSSTSTSIK-VKTDDIAR-a1-b2	pr|PROT05|Ashwin	pr|PROT03|FAM98B	inter-protein xl	mfaini_C1912_076.c.03798.03798.4_mfaini_C1912_076.c.03772.03772.4	98	245		2889.59	723.404	4	1.7	0.48	0.6	35.77
DKIIVNDR-LGKSHIR-a2-b3	pr|PROT01|HSPC117	pr|PROT02|DDX1	inter-protein xl	mfaini_C1912_076.c.01598.01598.4_mfaini_C1912_076.c.01572.01572.4	285	461		1919.1	480.782	4	0.5	0.63	0.87	35.72
EQHEIKNETK-HYKIEDR-a6-b3	pr|PROT05|Ashwin	pr|PROT04|CGI-99	inter-protein xl	mfaini_C1912_077.c.00591.00591.4_mfaini_C1912_077.c.00583.00583.4	84	41		2352.17	589.05	4	-1.6	0.33	0.38	35.57
YALSPKTTITMAHLLAAR-HDDYLVMLKAIR-a6-b9	pr|PROT03|FAM98B	pr|PROT04|CGI-99	inter-protein xl	mfaini_C1912_074.c.08796.08796.5_mfaini_C1912_074.c.08828.08828.5	263	154		3567.92	714.592	5	-2.8	0.64	0.78	35.51
LEYGDNAEKYK-IYQPKR-a9-b5	pr|PROT04|CGI-99	pr|PROT03|FAM98B	inter-protein xl	mfaini_C1912_075.c.02146.02146.3_mfaini_C1912_075.c.02118.02118.3	98	256		2270.16	757.728	3	1	0.64	0.38	35.42
IASPEGQDYLKGMAAAGNYAWVNR-ZSNAAGDVGGR-a11-b1	pr|PROT01|HSPC117	pr|PROT05|Ashwin	inter-protein xl	mfaini_C1912_074.c.07862.07862.3_mfaini_C1912_074.c.07906.07906.3	308	-2		3621.73	1208.25	3	-0.2	0.54	0.35	35.16
HDDYLVMLKAIR-EDLSKIIR-a9-b5	pr|PROT04|CGI-99	pr|PROT03|FAM98B	inter-protein xl	mfaini_C1912_076.c.07415.07415.4_mfaini_C1912_076.c.07398.07398.4	154	280		2583.41	646.86	4	0.2	0.26	0.85	35.05
VPVDEFDGKVTYGQK-ZSNAAGDVGGR-a9-b1	pr|PROT02|DDX1	pr|PROT05|Ashwin	inter-protein xl	mfaini_C1912_075.c.04583.04583.3_mfaini_C1912_075.c.04559.04559.3	687	-2		2721.32	908.116	3	0.1	0.52	0.21	35.02
VEQHVVDGKER-ZSNAAGDVGGR-a9-b1	pr|PROT01|HSPC117	pr|PROT05|Ashwin	inter-protein xl	mfaini_C1912_076.c.00979.00979.3_mfaini_C1912_076.c.00947.00947.3	366	-2		2335.15	779.391	3	-0.3	0.55	0.38	34.82
LTQDAVAKANQTK-KMGIDHK-a8-b1	pr|PROT04|CGI-99	pr|PROT01|HSPC117	inter-protein xl	mfaini_C1912_076.c.01271.01271.4_mfaini_C1912_076.c.01234.01234.4	171	245		2352.24	589.069	4	-1.5	0.24	0.73	34.52
DKIIVNDR-KQNLER-a2-b1	pr|PROT01|HSPC117	pr|PROT02|DDX1	inter-protein xl	mfaini_C1912_074.c.01926.01926.4_mfaini_C1912_074.c.01902.01902.4	285	555		1896.04	475.018	4	-1.3	0.72	0.88	34.52
YKDLVPDNSK-DLPKNR-a2-b4	pr|PROT04|CGI-99	pr|PROT05|Ashwin	inter-protein xl	mfaini_C1912_074.c.02758.02758.3_mfaini_C1912_074.c.02722.02722.3	100	67		2057.07	686.699	3	-2.7	0.41	0.51	34.22
NIHSSDWPKFFEK-ZSNAAGDVGGR-a9-b1	pr|PROT04|CGI-99	pr|PROT05|Ashwin	inter-protein xl	mfaini_C1912_076.c.04962.04962.4_mfaini_C1912_076.c.04820.04820.4	58	-2		2674.28	669.577	4	0.3	0.55	0.31	34.12
LEYGDNAEKYK-DLPKNR-a9-b4	pr|PROT04|CGI-99	pr|PROT05|Ashwin	inter-protein xl	mfaini_C1912_076.c.02270.02270.3_mfaini_C1912_076.c.02231.02231.3	98	67		2208.11	737.043	3	0	0.59	0.38	34.1
VKTDDIAR-VTYGQKR-a2-b6	pr|PROT03|FAM98B	pr|PROT02|DDX1	inter-protein xl	mfaini_C1912_075.c.01090.01090.3_mfaini_C1912_075.c.01068.01068.3	245	693		1905.03	636.017	3	-2.1	0.42	0.24	33.99
DVNCPFKIQDR-ZSNAAGDVGGR-a7-b1	pr|PROT04|CGI-99	pr|PROT05|Ashwin	inter-protein xl	mfaini_C1912_074.c.04308.04308.3_mfaini_C1912_074.c.04263.04263.3	72	-2		2431.16	811.394	3	1	0.52	0.54	33.89
NFIVWLEDQKIR-ZSNAAGDVGGR-a10-b1	pr|PROT04|CGI-99	pr|PROT05|Ashwin	inter-protein xl	mfaini_C1912_075.c.08772.08772.3_mfaini_C1912_075.c.08746.08746.3	36	-2		2600.34	867.788	3	2.8	0.5	0.46	33.67
EGLPVALDKHILGFDTGDAVLNEAAQILR-KXGIDHK-a9-b1	pr|PROT04|CGI-99	pr|PROT01|HSPC117	inter-protein xl	mfaini_C1912_074.c.09665.09665.5_mfaini_C1912_074.c.09664.09664.5	185	245		4056.14	812.236	5	1.5	0.39	0.5	33.38
TDDVHAKDNTRPGANSPEMWSEAIK-LGKVGR-a7-b3	pr|PROT02|DDX1	pr|PROT04|CGI-99	inter-protein xl	mfaini_C1912_075.c.03457.03457.4_mfaini_C1912_075.c.03427.03427.4	472	241		3534.76	884.697	4	1	0.4	0.36	33.3
EVKEWHGCR-LGKVGR-a3-b3	pr|PROT02|DDX1	pr|PROT04|CGI-99	inter-protein xl	mfaini_C1912_074.c.01440.01440.4_mfaini_C1912_074.c.01407.01407.4	117	241		1966.02	492.513	4	-0.7	0.24	0.34	33.23
LTALDYHNPAGFNCKDETEFR-KQNLER-a15-b1	pr|PROT04|CGI-99	pr|PROT02|DDX1	inter-protein xl	mfaini_C1912_075.c.04267.04267.4_mfaini_C1912_075.c.04247.04247.4	20	555		3421.63	856.415	4	-1.9	0.41	0.31	32.62
LEYGDNAEKYK-ZSNAAGDVGGR-a9-b1	pr|PROT04|CGI-99	pr|PROT05|Ashwin	inter-protein xl	mfaini_C1912_074.c.02834.02834.3_mfaini_C1912_074.c.02801.02801.3	98	-2		2369.1	790.709	3	-4.4	0.41	0	32.6
STTSDIPHMLNQVESKVK-LTQDAVAKANQTK-a16-b8	pr|PROT03|FAM98B	pr|PROT04|CGI-99	inter-protein xl	mfaini_C1912_077.c.05860.05860.4_mfaini_C1912_077.c.05841.05841.4	177	171		3537.83	885.465	4	-1.3	0.39	0.73	32.47
MLQADPNKVSAR-ZSNAAGDVGGR-a8-b1	pr|PROT01|HSPC117	pr|PROT05|Ashwin	inter-protein xl	mfaini_C1912_077.c.02647.02647.3_mfaini_C1912_077.c.02689.02689.3	206	-2		2369.17	790.732	3	-1.5	0.61	0.57	32.43
EDLSKIIR-KMGIDHK-a5-b1	pr|PROT03|FAM98B	pr|PROT01|HSPC117	inter-protein xl	mfaini_C1912_077.c.02945.02945.3_mfaini_C1912_077.c.02920.02920.3	280	245		1938.06	647.028	3	0.1	0.23	0.68	32.42
REQHEIKNETK-FFEKYLR-a7-b4	pr|PROT05|Ashwin	pr|PROT04|CGI-99	inter-protein xl	mfaini_C1912_077.c.02284.02284.5_mfaini_C1912_077.c.02291.02291.5	84	62		2550.32	511.073	5	0.4	0.37	0.86	32.41
EKTACAINK-LGKVGR-a2-b3	pr|PROT03|FAM98B	pr|PROT04|CGI-99	inter-protein xl	mfaini_C1912_077.c.00902.00902.4_mfaini_C1912_077.c.00878.00878.4	292	241		1799.99	451.005	4	-1.9	0.23	0	32.08
XLQADPNKVSAR-ZSNAAGDVGGR-a8-b1	pr|PROT01|HSPC117	pr|PROT05|Ashwin	inter-protein xl	mfaini_C1912_075.c.02158.02158.3_mfaini_C1912_075.c.02126.02126.3	206	-2		2385.17	796.066	3	1.2	0.39	0.51	31.91
DVNCPFKIQDR-KKEDCLK-a7-b2	pr|PROT04|CGI-99	pr|PROT03|FAM98B	inter-protein xl	mfaini_C1912_075.c.02544.02544.3_mfaini_C1912_075.c.02522.02522.3	72	110		2448.21	817.077	3	-2.9	0.36	0.79	31.77
INEAIVAVQAIIADPKTDHR-ZSNAAGDVGGR-a16-b1	pr|PROT04|CGI-99	pr|PROT05|Ashwin	inter-protein xl	mfaini_C1912_074.c.07288.07288.4_mfaini_C1912_074.c.07269.07269.4	234	-2		3213.68	804.427	4	1.1	0.59	0.63	31.69
YKDLVPDNSK-IYQPKR-a2-b5	pr|PROT04|CGI-99	pr|PROT03|FAM98B	inter-protein xl	mfaini_C1912_077.c.02483.02483.3_mfaini_C1912_077.c.02451.02451.3	100	256		2119.13	707.383	3	-2.2	0.43	0.65	31.66
EQHEIKNETKR-FFEKYLR-a6-b4	pr|PROT05|Ashwin	pr|PROT04|CGI-99	inter-protein xl	mfaini_C1912_074.c.02469.02469.4_mfaini_C1912_074.c.02471.02471.4	84	62		2550.32	638.587	4	-2.2	0.28	0.69	31.41
VNKDSLTDLYVQHAIPLPQR-LGKVGR-a3-b3	pr|PROT05|Ashwin	pr|PROT04|CGI-99	inter-protein xl	mfaini_C1912_074.c.06104.06104.4_mfaini_C1912_074.c.06062.06062.4	46	241		3072.71	769.185	4	0.3	0.27	0.78	31.3
AAGGGSYKGHVDILAPTVQELAALEK-IASPEGQDYLKGMAAAGNYAWVNR-a8-b11	pr|PROT02|DDX1	pr|PROT01|HSPC117	inter-protein xl	mfaini_C1912_074.c.09389.09389.5_mfaini_C1912_074.c.09363.09363.5	702	308		5313.68	1063.74	5	0.7	0.33	0.64	30.96
LTALDYHNPAGFNCKDETEFR-VTYGQKR-a15-b6	pr|PROT04|CGI-99	pr|PROT02|DDX1	inter-protein xl	mfaini_C1912_075.c.04382.04382.5_mfaini_C1912_075.c.04359.04359.5	20	693		3485.67	698.141	5	0.3	0.38	0.51	30.72
DKIIVNDR-VTYGQKR-a2-b6	pr|PROT01|HSPC117	pr|PROT02|DDX1	inter-protein xl	mfaini_C1912_077.c.02043.02043.3_mfaini_C1912_077.c.02021.02021.3	285	693		1960.08	654.366	3	0.6	0.48	0.45	30.7
VASPKLVMEEAPESYK-EVKEWHGCR-a5-b3	pr|PROT01|HSPC117	pr|PROT02|DDX1	inter-protein xl	mfaini_C1912_074.c.04440.04440.4_mfaini_C1912_074.c.04419.04419.4	465	117		3114.52	779.638	4	1.6	0.34	0.3	30.55
LTALDYHNPAGFNCKDETEFR-LKPPPQASFTSNAFR-a15-b2	pr|PROT04|CGI-99	pr|PROT05|Ashwin	inter-protein xl	mfaini_C1912_077.c.06035.06035.5_mfaini_C1912_077.c.06013.06013.5	20	127		4295.08	860.024	5	1	0.41	0.42	30.52
AAGGGSYKGHVDILAPTVQELAALEK-MLQADPNKVSAR-a8-b8	pr|PROT02|DDX1	pr|PROT01|HSPC117	inter-protein xl	mfaini_C1912_075.c.07019.07019.4_mfaini_C1912_075.c.06990.06990.4	702	206		4061.12	1016.29	4	-0.6	0.42	0.68	30.48
RAAGGGSYKGHVDILAPTVQELAALEK-ZSNAAGDVGGR-a9-b1	pr|PROT02|DDX1	pr|PROT05|Ashwin	inter-protein xl	mfaini_C1912_074.c.06624.06624.4_mfaini_C1912_074.c.06595.06595.4	702	-2		3790.96	948.748	4	-0.2	0.61	0.9	30.27
LKPPPQASFTSNAFR-DVNCPFKIQDR-a2-b7	pr|PROT05|Ashwin	pr|PROT04|CGI-99	inter-protein xl	mfaini_C1912_074.c.06051.06051.4_mfaini_C1912_074.c.06065.06065.4	127	72		3188.61	798.161	4	1.2	0.32	0.72	30
VASPKLVMEEAPESYK-ZSNAAGDVGGR-a5-b1	pr|PROT01|HSPC117	pr|PROT05|Ashwin	inter-protein xl	mfaini_C1912_076.c.04976.04976.3_mfaini_C1912_076.c.04971.04971.3	465	-2		2817.38	940.134	3	-2.2	0.43	0.21	30
EGLPVALDKHILGFDTGDAVLNEAAQILR-NVTDVVNTCHDAGISKK-a9-b16	pr|PROT04|CGI-99	pr|PROT01|HSPC117	inter-protein xl	mfaini_C1912_074.c.09893.09893.4_mfaini_C1912_074.c.09906.09906.4	185	492		5069.6	1268.41	4	-1.6	0.28	0.78	29.2
ZSNAAGDVGGR-IYQPKR-a1-b5	pr|PROT05|Ashwin	pr|PROT03|FAM98B	inter-protein xl	mfaini_C1912_074.c.01621.01621.3_mfaini_C1912_074.c.01593.01593.3	-2	256		1843.95	615.659	3	-0.9	0.4	0.27	28.94
LTALDYHNPAGFNCKDETEFR-IYQPKR-a15-b5	pr|PROT04|CGI-99	pr|PROT03|FAM98B	inter-protein xl	mfaini_C1912_074.c.04630.04630.4_mfaini_C1912_074.c.04609.04609.4	20	256		3438.67	860.676	4	1.4	0.4	0.24	28.33
VPVDEFDGKVTYGQK-MLQADPNKVSAR-a9-b8	pr|PROT02|DDX1	pr|PROT01|HSPC117	inter-protein xl	mfaini_C1912_076.c.04632.04632.4_mfaini_C1912_076.c.04599.04599.4	687	206		3147.58	787.904	4	-2.2	0.39	0.33	28.06
IDCDNLEQYFIQQGGGPDKK-ZSNAAGDVGGR-a19-b1	pr|PROT02|DDX1	pr|PROT05|Ashwin	inter-protein xl	mfaini_C1912_074.c.07026.07026.3_mfaini_C1912_074.c.07018.07018.3	535	-2		3364.55	1122.53	3	-3.7	0.3	0.46	27.74
KFEELVQTR-FFEKYLR-a1-b4	sp|P0A6Y8|DNAK_ECOLI	pr|PROT04|CGI-99	inter-protein xl	mfaini_C1912_074.c.06576.06576.4_mfaini_C1912_074.c.06546.06546.4	528	62		2288.22	573.062	4	-1.9	0.14	0.69	27.49		cross-link with contaminant
LEYGDNAEKYK-WGKMMEK-a9-b3	pr|PROT04|CGI-99	pr|PROT05|Ashwin	inter-protein xl	mfaini_C1912_077.c.03642.03642.3_mfaini_C1912_077.c.03618.03618.3	98	72		2375.12	792.714	3	-0.2	0.38	0.28	27.37
NIHSSDWPKFFEK-EQHEIKNETK-a9-b6	pr|PROT04|CGI-99	pr|PROT05|Ashwin	inter-protein xl	mfaini_C1912_075.c.03262.03262.4_mfaini_C1912_075.c.03284.03284.4	58	84		3026.48	757.627	4	0.3	0.15	0.64	27.19
LKPPPQASFTSNAFR-VEQHVVDGKER-a2-b9	pr|PROT05|Ashwin	pr|PROT01|HSPC117	inter-protein xl	mfaini_C1912_077.c.03242.03242.4_mfaini_C1912_077.c.03210.03210.4	127	366		3092.6	774.158	4	-1.5	0.4	0.35	26.71
DLVPDNSKTADNATK-ZSNAAGDVGGR-a8-b1	pr|PROT04|CGI-99	pr|PROT05|Ashwin	inter-protein xl	mfaini_C1912_077.c.02969.02969.3_mfaini_C1912_077.c.02917.02917.3	108	-2		2628.26	877.096	3	0.3	0.71	0	26.63
VASPKLVMEEAPESYK-KQNLER-a5-b1	pr|PROT01|HSPC117	pr|PROT02|DDX1	inter-protein xl	mfaini_C1912_076.c.03997.03997.3_mfaini_C1912_076.c.03996.03996.3	465	555		2701.4	901.475	3	0.3	0.46	0.18	26.54
ZSNAAGDVGGR-HYKIEDR-a1-b3	pr|PROT05|Ashwin	pr|PROT04|CGI-99	inter-protein xl	mfaini_C1912_077.c.01459.01459.4_mfaini_C1912_077.c.01415.01415.4	-2	41		1999.97	501.001	4	1.1	0.24	0.57	26.47
EQHEIKNETKR-FFEKYLR-a10-b4	pr|PROT05|Ashwin	pr|PROT04|CGI-99	inter-protein xl	mfaini_C1912_074.c.02317.02317.3_mfaini_C1912_074.c.02300.02300.3	88	62		2550.32	851.116	3	0	0.3	0.66	25.59
GLPQLGTLGAGNHYAEIQVVDEIFNEYAAKK-ANQTKEGLPVALDK-a30-b5	pr|PROT01|HSPC117	pr|PROT04|CGI-99	inter-protein xl	mfaini_C1912_074.c.10122.10122.4_mfaini_C1912_074.c.10139.10139.4	244	176		4965.58	1242.4	4	0.3	0.33	0.47	25.07
VASPKLVMEEAPESYK-LKPPPQASFTSNAFR-a5-b2	pr|PROT01|HSPC117	pr|PROT05|Ashwin	inter-protein xl	mfaini_C1912_075.c.06142.06142.4_mfaini_C1912_075.c.06123.06123.4	465	127		3574.83	894.716	4	-1.6	0.54	0.39	24.9
KVAEFFGK-FKKGDVR-a1-b2	sp|P0A6Y8|DNAK_ECOLI	pr|PROT02|DDX1	inter-protein xl	mfaini_C1912_076.c.04533.04533.3_mfaini_C1912_076.c.04205.04205.3	352	562		1911.06	638.027	3	-2.2	0.41	0.76	24.29		cross-link with contaminant
FFEKYLR-VTYGQKR-a4-b6	pr|PROT04|CGI-99	pr|PROT02|DDX1	inter-protein xl	mfaini_C1912_075.c.04022.04022.3_mfaini_C1912_075.c.04000.04000.3	62	693		1990.07	664.364	3	0	0.41	0.58	23.37
VEQHVVDGKER-VTYGQKR-a9-b6	pr|PROT01|HSPC117	pr|PROT02|DDX1	inter-protein xl	mfaini_C1912_075.c.00611.00611.4_mfaini_C1912_075.c.00573.00573.4	366	693		2283.19	571.806	4	-2.5	0.52	0.89	23.18
EKTACAINK-WGKMMEKK-a2-b7	pr|PROT03|FAM98B	pr|PROT05|Ashwin	inter-protein xl	mfaini_C1912_075.c.02299.02299.3_mfaini_C1912_075.c.02258.02258.3	292	76		2208.11	737.043	3	-2	0.37	0.48	20.71
LKPPPQASFTSNAFR-IYQPKR-a2-b5	pr|PROT05|Ashwin	pr|PROT03|FAM98B	inter-protein xl	mfaini_C1912_075.c.03812.03812.3_mfaini_C1912_075.c.03801.03801.3	127	256		2601.4	868.142	3	-1.6	0.48	0.45	20.13
GKHYYEVSCHDQGLCR-GHVKFSK-a2-b4	pr|PROT02|DDX1	pr|PROT02|DDX1	intra-protein xl	mfaini_C1912_074.c.01451.01451.4_mfaini_C1912_074.c.01398.01398.4	132	204	72	2947.38	737.853	4	-1.8	0.37	0.71	46.93
HDDYLVMLKAIR-LGKVGR-a9-b3	pr|PROT04|CGI-99	pr|PROT04|CGI-99	intra-protein xl	mfaini_C1912_074.c.06033.06033.4_mfaini_C1912_074.c.06003.06003.4	154	241	87	2239.25	560.82	4	-1.3	0.64	0.76	45.69
LTQDAVAKANQTK-LGKVGR-a8-b3	pr|PROT04|CGI-99	pr|PROT04|CGI-99	intra-protein xl	mfaini_C1912_075.c.01630.01630.4_mfaini_C1912_075.c.01619.01619.4	171	241	70	2153.22	539.312	4	0.4	0.58	0.73	43.71
SQHSGNAQVTQTKFLPNAPK-TTIKTGASVLNK-a13-b4	pr|PROT02|DDX1	pr|PROT02|DDX1	intra-protein xl	mfaini_C1912_075.c.03396.03396.4_mfaini_C1912_075.c.03367.03367.4	281	82	199	3521.89	881.479	4	0.5	0.39	0.33	42.98
ELAEQTLNNIKQFK-KYIDNPKLR-a11-b7	pr|PROT02|DDX1	pr|PROT02|DDX1	intra-protein xl	mfaini_C1912_076.c.05368.05368.3_mfaini_C1912_076.c.05344.05344.3	307	317	10	2958.62	987.216	3	1.8	0.41	0.46	42.62
NQALFPACVLKNAELK-EVKEWHGCR-a11-b3	pr|PROT02|DDX1	pr|PROT02|DDX1	intra-protein xl	mfaini_C1912_077.c.05485.05485.5_mfaini_C1912_077.c.05463.05463.5	234	117	117	3152.59	631.526	5	0.1	0.58	0.66	42.54
TDDVHAKDNTRPGANSPEMWSEAIK-EVKEWHGCR-a7-b3	pr|PROT02|DDX1	pr|PROT02|DDX1	intra-protein xl	mfaini_C1912_077.c.03460.03460.5_mfaini_C1912_077.c.03439.03439.5	472	117	355	4105.9	822.188	5	-0.3	0.33	0.73	42.14
INEAIVAVQAIIADPKTDHR-LGKVGR-a16-b3	pr|PROT04|CGI-99	pr|PROT04|CGI-99	intra-protein xl	mfaini_C1912_074.c.06739.06739.5_mfaini_C1912_074.c.06706.06706.5	234	241	7	2939.65	588.937	5	-3.4	0.69	0.48	41.65
LDDLVSTGKLNLSQVR-GLMKGK-a9-b4	pr|PROT02|DDX1	pr|PROT02|DDX1	intra-protein xl	mfaini_C1912_077.c.05747.05747.4_mfaini_C1912_077.c.05714.05714.4	358	130	228	2527.41	632.859	4	0.1	0.46	0.85	41.52
APDGYIVKSQHSGNAQVTQTK-DQQEGKK-a8-b6	pr|PROT02|DDX1	pr|PROT02|DDX1	intra-protein xl	mfaini_C1912_074.c.01182.01182.4_mfaini_C1912_074.c.01146.01146.4	268	75	193	3197.59	800.407	4	0	0.44	0.74	41.46
SQHSGNAQVTQTKFLPNAPK-DQQEGKK-a13-b6	pr|PROT02|DDX1	pr|PROT02|DDX1	intra-protein xl	mfaini_C1912_074.c.01886.01886.5_mfaini_C1912_074.c.01848.01848.5	281	75	206	3121.58	625.324	5	0.8	0.47	0.88	41.39
APDGYIVKSQHSGNAQVTQTK-ATKGLMK-a8-b3	pr|PROT02|DDX1	pr|PROT02|DDX1	intra-protein xl	mfaini_C1912_076.c.02005.02005.4_mfaini_C1912_076.c.02034.02034.4	268	126	142	3113.62	779.412	4	0.2	0.48	0.43	41.18
HYKIEDR-LGKVGR-a3-b3	pr|PROT04|CGI-99	pr|PROT04|CGI-99	intra-protein xl	mfaini_C1912_077.c.00952.00952.4_mfaini_C1912_077.c.00922.00922.4	41	241	200	1725.95	432.495	4	-2.2	0.61	0	40.85
SQHSGNAQVTQTKFLPNAPK-GKTTIK-a13-b2	pr|PROT02|DDX1	pr|PROT02|DDX1	intra-protein xl	mfaini_C1912_077.c.02032.02032.4_mfaini_C1912_077.c.02011.02011.4	281	78	203	2936.57	735.151	4	-0.1	0.44	0.36	40.75
VNKDSLTDLYVQHAIPLPQR-ZSNAAGDVGGR-a3-b1	pr|PROT05|Ashwin	pr|PROT05|Ashwin	intra-protein xl	mfaini_C1912_075.c.06402.06402.4_mfaini_C1912_075.c.06379.06379.4	46	-2	48	3346.72	837.688	4	-2	0.44	0.64	40.25
APDGYIVKSQHSGNAQVTQTK-TTIKTGASVLNK-a8-b4	pr|PROT02|DDX1	pr|PROT02|DDX1	intra-protein xl	mfaini_C1912_077.c.02755.02755.4_mfaini_C1912_077.c.02790.02790.4	268	82	186	3597.9	900.483	4	-0.3	0.4	0.71	40.02
FFEKYLR-HYKIEDR-a4-b3	pr|PROT04|CGI-99	pr|PROT04|CGI-99	intra-protein xl	mfaini_C1912_074.c.04116.04116.3_mfaini_C1912_074.c.04089.04089.3	62	41	21	2099.08	700.702	3	-1.3	0.49	0.47	40.02
KRPLIVFDGSSTSTSIKVK-KTENGDNDR-a17-b1	pr|PROT05|Ashwin	pr|PROT05|Ashwin	intra-protein xl	mfaini_C1912_076.c.02077.02077.4_mfaini_C1912_076.c.02068.02068.4	114	117	3	3247.7	812.932	4	-2.4	0.45	0.33	39.91
FLPNAPKALIVEPSR-DQQEGKK-a7-b6	pr|PROT02|DDX1	pr|PROT02|DDX1	intra-protein xl	mfaini_C1912_076.c.04380.04380.4_mfaini_C1912_076.c.04386.04386.4	288	75	213	2620.42	656.113	4	-0.1	0.45	0.82	39.75
TGASVLNKWQMNPYDR-DQQEGKK-a8-b6	pr|PROT02|DDX1	pr|PROT02|DDX1	intra-protein xl	mfaini_C1912_075.c.04955.04955.4_mfaini_C1912_075.c.04936.04936.4	90	75	15	2848.38	713.103	4	-0.6	0.38	0.42	39.71
KRPLIVFDGSSTSTSIK-ZSNAAGDVGGR-a1-b1	pr|PROT05|Ashwin	pr|PROT05|Ashwin	intra-protein xl	mfaini_C1912_076.c.04122.04122.4_mfaini_C1912_076.c.04083.04083.4	98	-2	100	2875.51	719.884	4	0.3	0.45	0.46	39.49
TTIKTGASVLNK-DQQEGKK-a4-b6	pr|PROT02|DDX1	pr|PROT02|DDX1	intra-protein xl	mfaini_C1912_075.c.01627.01627.3_mfaini_C1912_075.c.01601.01601.3	82	75	7	2201.19	734.738	3	0.3	0.45	0.47	39.41
VASPKLVXEEAPESYK-LRPIAVIKG-a5-b8	pr|PROT01|HSPC117	pr|PROT01|HSPC117	intra-protein xl	mfaini_C1912_074.c.04940.04940.4_mfaini_C1912_074.c.04923.04923.4	465	504	39	2896.59	725.157	4	-1.1	0.4	0.28	39.37
ELAEQTLNNIKQFKK-YIDNPKLR-a11-b6	pr|PROT02|DDX1	pr|PROT02|DDX1	intra-protein xl	mfaini_C1912_075.c.05210.05210.3_mfaini_C1912_075.c.05194.05194.3	307	317	10	2958.62	987.214	3	0.5	0.38	0.75	39.32
SQHSGNAQVTQTKFLPNAPK-LDDLVSTGKLNLSQVR-a13-b9	pr|PROT02|DDX1	pr|PROT02|DDX1	intra-protein xl	mfaini_C1912_074.c.05969.05969.5_mfaini_C1912_074.c.05966.05966.5	281	358	77	4047.14	810.436	5	0.5	0.35	0.64	39.26
TDDVHAKDNTRPGANSPEMWSEAIK-LGKSHIR-a7-b3	pr|PROT02|DDX1	pr|PROT02|DDX1	intra-protein xl	mfaini_C1912_075.c.02862.02862.5_mfaini_C1912_075.c.03010.03010.5	472	461	11	3715.84	744.176	5	0.4	0.48	0.88	38.8
GLGHQVATDALVAMEKAMKR-RDKIIVNDR-a16-b3	pr|PROT01|HSPC117	pr|PROT01|HSPC117	intra-protein xl	mfaini_C1912_077.c.08444.08444.4_mfaini_C1912_077.c.08417.08417.4	279	285	6	3390.81	848.71	4	-4.7	0.39	0.45	38.54
APDGYIVKSQHSGNAQVTQTK-ATKGLXK-a8-b3	pr|PROT02|DDX1	pr|PROT02|DDX1	intra-protein xl	mfaini_C1912_077.c.01718.01718.4_mfaini_C1912_077.c.01707.01707.4	268	126	142	3129.61	783.412	4	0.7	0.39	0.48	38.38
LDDLVSTGKLNLSQVR-EVKEWHGCR-a9-b3	pr|PROT02|DDX1	pr|PROT02|DDX1	intra-protein xl	mfaini_C1912_077.c.05268.05268.5_mfaini_C1912_077.c.05246.05246.5	358	117	241	3094.59	619.926	5	1	0.32	0.53	38.35
VQKNHVGKPLLK-VKDILSK-a3-b2	pr|PROT03|FAM98B	pr|PROT03|FAM98B	intra-protein xl	mfaini_C1912_074.c.01646.01646.5_mfaini_C1912_074.c.01633.01633.5	187	179	8	2299.4	460.887	5	-1.6	0.35	0.76	38.08
ELAEQTLNNIKQFK-KYIDNPK-a11-b1	pr|PROT02|DDX1	pr|PROT02|DDX1	intra-protein xl	mfaini_C1912_076.c.05570.05570.4_mfaini_C1912_076.c.05543.05543.4	307	311	4	2689.43	673.366	4	0	0.47	0.82	37.6
LGKVGR-LGKVGR-a3-b3	pr|PROT04|CGI-99	pr|PROT04|CGI-99	intra-protein xl	mfaini_C1912_074.c.00976.00976.3_mfaini_C1912_074.c.00946.00946.3	241	241	0	1394.87	465.965	3	-0.1	0.54	0	37.46
AKLESLVEDLVNR-HMNIKVTR-a2-b5	sp|P0A6Y8|DNAK_ECOLI	sp|P0A6Y8|DNAK_ECOLI	intra-protein xl	mfaini_C1912_076.c.06738.06738.3_mfaini_C1912_076.c.06726.06726.3	304	299	5	2620.44	874.489	3	2.3	0.25	0.45	37.33		contaminant
TKIDCDNLEQYFIQQGGGPDK-GKGCYNTR-a2-b2	pr|PROT02|DDX1	pr|PROT02|DDX1	intra-protein xl	mfaini_C1912_076.c.05964.05964.4_mfaini_C1912_076.c.05816.05816.4	516	636	120	3517.62	880.414	4	0.3	0.31	0.3	36.95
MHNQIPQVTSDGKR-DQQEGKK-a13-b6	pr|PROT02|DDX1	pr|PROT02|DDX1	intra-protein xl	mfaini_C1912_074.c.00928.00928.4_mfaini_C1912_074.c.00771.00771.4	399	75	324	2579.27	645.825	4	-2.7	0.46	0.33	36.85
EVKEWHGCR-KQNLER-a3-b1	pr|PROT02|DDX1	pr|PROT02|DDX1	intra-protein xl	mfaini_C1912_077.c.00946.00946.3_mfaini_C1912_077.c.00925.00925.3	117	555	438	2124.06	709.027	3	1.4	0.39	0.84	36.85
MHNQIPQVTSDGKR-KQNLER-a13-b1	pr|PROT02|DDX1	pr|PROT02|DDX1	intra-protein xl	mfaini_C1912_074.c.01555.01555.4_mfaini_C1912_074.c.01429.01429.4	399	555	156	2534.3	634.583	4	-1.2	0.56	0.84	36.78
ALIVEPSRELAEQTLNNIKQFK-YIDNPKLR-a19-b6	pr|PROT02|DDX1	pr|PROT02|DDX1	intra-protein xl	mfaini_C1912_075.c.07957.07957.5_mfaini_C1912_075.c.07937.07937.5	307	317	10	3696.02	740.211	5	-2.3	0.41	0.44	36.78
EKTACAINK-IYQPKR-a2-b5	pr|PROT03|FAM98B	pr|PROT03|FAM98B	intra-protein xl	mfaini_C1912_077.c.00914.00914.4_mfaini_C1912_077.c.00891.00891.4	292	256	36	1975.06	494.771	4	-0.7	0.27	0.81	36.36
FFEKYLR-LGKVGR-a4-b3	pr|PROT04|CGI-99	pr|PROT04|CGI-99	intra-protein xl	mfaini_C1912_077.c.04351.04351.3_mfaini_C1912_077.c.04324.04324.3	62	241	179	1768.01	590.343	3	1.4	0.51	0.7	36.33
ELAEQTLNNIKQFK-YIDNPKLR-a11-b6	pr|PROT02|DDX1	pr|PROT02|DDX1	intra-protein xl	mfaini_C1912_074.c.06452.06452.4_mfaini_C1912_074.c.06450.06450.4	307	317	10	2830.52	708.639	4	0.5	0.45	0.63	36.18
YALSPKTTITMAHLLAAR-IYQPKR-a6-b5	pr|PROT03|FAM98B	pr|PROT03|FAM98B	intra-protein xl	mfaini_C1912_075.c.05956.05956.4_mfaini_C1912_075.c.05950.05950.4	263	256	7	2898.61	725.661	4	-1	0.6	0.85	36.08
TKIDCDNLEQYFIQQGGGPDKK-GKGCYNTR-a2-b2	pr|PROT02|DDX1	pr|PROT02|DDX1	intra-protein xl	mfaini_C1912_076.c.05047.05047.3_mfaini_C1912_076.c.05008.05008.3	516	636	120	3645.72	1216.25	3	-0.3	0.32	0.23	36.06
GLGHQVATDALVAMEKAMK-RDKIIVNDR-a16-b3	pr|PROT01|HSPC117	pr|PROT01|HSPC117	intra-protein xl	mfaini_C1912_075.c.06644.06644.4_mfaini_C1912_075.c.06713.06713.4	279	285	6	3234.73	809.689	4	1.4	0.43	0.88	36.02
VQKNHVGKPLLK-EDLSKIIR-a3-b5	pr|PROT03|FAM98B	pr|PROT03|FAM98B	intra-protein xl	mfaini_C1912_077.c.02373.02373.4_mfaini_C1912_077.c.02332.02332.4	187	280	93	2470.46	618.624	4	0.3	0.33	0.85	35.67
TDDVHAKDNTRPGANSPEMWSEAIK-GKGCYNTR-a7-b2	pr|PROT02|DDX1	pr|PROT02|DDX1	intra-protein xl	mfaini_C1912_074.c.03118.03118.5_mfaini_C1912_074.c.03092.03092.5	472	636	164	3860.79	773.165	5	0.3	0.43	0.21	35.62
NQALFPACVLKNAELK-FGFGFGGTGKK-a11-b10	pr|PROT02|DDX1	pr|PROT02|DDX1	intra-protein xl	mfaini_C1912_074.c.08265.08265.4_mfaini_C1912_074.c.08266.08266.4	234	172	62	3054.61	764.659	4	2.1	0.63	0.86	35.59
KRPLIVFDGSSTSTSIK-EQHEIKNETK-a1-b6	pr|PROT05|Ashwin	pr|PROT05|Ashwin	intra-protein xl	mfaini_C1912_077.c.02786.02786.4_mfaini_C1912_077.c.02770.02770.4	98	84	14	3227.7	807.933	4	-0.6	0.37	0.69	35.51
TDDVHAKDNTRPGANSPEXWSEAIK-GKGCYNTR-a7-b2	pr|PROT02|DDX1	pr|PROT02|DDX1	intra-protein xl	mfaini_C1912_076.c.02597.02597.5_mfaini_C1912_076.c.02577.02577.5	472	636	164	3876.78	776.363	5	-1	0.32	0.2	35.43
VKTDDIAR-IYQPKR-a2-b5	pr|PROT03|FAM98B	pr|PROT03|FAM98B	intra-protein xl	mfaini_C1912_075.c.01419.01419.3_mfaini_C1912_075.c.01389.01389.3	245	256	11	1858.03	620.35	3	-2.3	0.5	0.29	35.36
DVNCPFKIQDR-HYKIEDR-a7-b3	pr|PROT04|CGI-99	pr|PROT04|CGI-99	intra-protein xl	mfaini_C1912_076.c.03183.03183.4_mfaini_C1912_076.c.03159.03159.4	72	41	31	2488.22	623.062	4	0	0.51	0.55	35.32
EGLPVALDKHILGFDTGDAVLNEAAQILR-LTQDAVAKANQTK-a9-b8	pr|PROT04|CGI-99	pr|PROT04|CGI-99	intra-protein xl	mfaini_C1912_075.c.09918.09918.4_mfaini_C1912_075.c.09922.09922.4	185	171	14	4599.46	1150.87	4	0.8	0.39	0.32	34.8
IASPEGQDYLKGMAAAGNYAWVNR-DKIIVNDR-a11-b2	pr|PROT01|HSPC117	pr|PROT01|HSPC117	intra-protein xl	mfaini_C1912_076.c.07499.07499.4_mfaini_C1912_076.c.07516.07516.4	308	285	23	3690.86	923.722	4	2.6	0.37	0.78	34.51
LKPPPQASFTSNAFR-KTENGDNDR-a2-b1	pr|PROT05|Ashwin	pr|PROT05|Ashwin	intra-protein xl	mfaini_C1912_075.c.02967.02967.4_mfaini_C1912_075.c.02953.02953.4	127	117	10	2845.4	712.357	4	-0.6	0.34	0.85	34.42
TADNATKNAEPLINLDVNNPDFK-YKDLVPDNSK-a7-b2	pr|PROT04|CGI-99	pr|PROT04|CGI-99	intra-protein xl	mfaini_C1912_076.c.06532.06532.4_mfaini_C1912_076.c.06509.06509.4	115	100	15	3828.91	958.235	4	0.9	0.45	0.44	34.27
EVKEWHGCR-GKGCYNTR-a3-b2	pr|PROT02|DDX1	pr|PROT02|DDX1	intra-protein xl	mfaini_C1912_076.c.00880.00880.3_mfaini_C1912_076.c.00832.00832.3	117	636	519	2292.05	765.025	3	-0.4	0.34	0	34.19
WGKMMEK-DLPKNR-a3-b4	pr|PROT05|Ashwin	pr|PROT05|Ashwin	intra-protein xl	mfaini_C1912_077.c.02898.02898.3_mfaini_C1912_077.c.02569.02569.3	72	67	5	1787.91	596.977	3	0.4	0.65	0.83	33.97
NVTDVVNTCHDAGISKK-INKNCWR-a16-b3	pr|PROT01|HSPC117	pr|PROT01|HSPC117	intra-protein xl	mfaini_C1912_074.c.03415.03415.3_mfaini_C1912_074.c.03393.03393.3	492	17	475	2984.45	995.825	3	-3.2	0.45	0.32	33.76
ILKGEYAVR-AIKEHK-a3-b3	pr|PROT02|DDX1	pr|PROT02|DDX1	intra-protein xl	mfaini_C1912_075.c.01014.01014.3_mfaini_C1912_075.c.00985.00985.3	493	502	9	1910.1	637.707	3	-1.2	0.49	0	33.58
NHVGKPLLK-EDLSKIIR-a5-b5	pr|PROT03|FAM98B	pr|PROT03|FAM98B	intra-protein xl	mfaini_C1912_076.c.03484.03484.3_mfaini_C1912_076.c.03462.03462.3	192	280	88	2115.24	706.089	3	0.3	0.37	0.84	33.33
IASPEGQDYLKGMAAAGNYAWVNR-MLQADPNKVSAR-a11-b8	pr|PROT01|HSPC117	pr|PROT01|HSPC117	intra-protein xl	mfaini_C1912_075.c.07183.07183.4_mfaini_C1912_075.c.07193.07193.4	308	206	102	4047.99	1013.01	4	-0.1	0.34	0.51	33.27
IASPEGQDYLKGMAAAGNYAWVNR-XLQADPNKVSAR-a11-b8	pr|PROT01|HSPC117	pr|PROT01|HSPC117	intra-protein xl	mfaini_C1912_077.c.06896.06896.4_mfaini_C1912_077.c.06869.06869.4	308	206	102	4063.98	1017	4	-1.7	0.38	0.66	33.14
LDDLVSTGKLNLSQVR-KQNLER-a9-b1	pr|PROT02|DDX1	pr|PROT02|DDX1	intra-protein xl	mfaini_C1912_074.c.05319.05319.4_mfaini_C1912_074.c.05278.05278.4	358	555	197	2681.47	671.375	4	-1.7	0.45	0.89	33.09
IAGLEVKR-QATKDAGR-a7-b4	sp|P0A6Y8|DNAK_ECOLI	sp|P0A6Y8|DNAK_ECOLI	intra-protein xl	mfaini_C1912_075.c.01642.01642.4_mfaini_C1912_075.c.01611.01611.4	166	155	11	1868.05	468.02	4	0	0.34	0.77	33.07		contaminant
NFIVWLEDQKIR-DVNCPFKIQDR-a10-b7	pr|PROT04|CGI-99	pr|PROT04|CGI-99	intra-protein xl	mfaini_C1912_075.c.09324.09324.4_mfaini_C1912_075.c.09311.09311.4	36	72	36	3088.58	773.153	4	-0.4	0.42	0.68	32.53
FNFGEEEFKFPPKDGFVALSK-GHVKFSK-a9-b4	pr|PROT02|DDX1	pr|PROT02|DDX1	intra-protein xl	mfaini_C1912_075.c.06547.06547.5_mfaini_C1912_075.c.06515.06515.5	248	204	44	3371.72	675.351	5	-1.4	0.52	0.88	32.24
DVNCPFKIQDR-FFEKYLR-a7-b4	pr|PROT04|CGI-99	pr|PROT04|CGI-99	intra-protein xl	mfaini_C1912_077.c.06508.06508.3_mfaini_C1912_077.c.06464.06464.3	72	62	10	2530.27	844.432	3	1.4	0.44	0.48	32.06
NFIVWLEDQKIR-HYKIEDR-a10-b3	pr|PROT04|CGI-99	pr|PROT04|CGI-99	intra-protein xl	mfaini_C1912_074.c.07572.07572.3_mfaini_C1912_074.c.07565.07565.3	36	41	5	2657.4	886.809	3	2.2	0.46	0.86	31.8
DGFVALSKAPDGYIVK-TGASVLNKWQMNPYDR-a8-b8	pr|PROT02|DDX1	pr|PROT02|DDX1	intra-protein xl	mfaini_C1912_074.c.08586.08586.4_mfaini_C1912_074.c.08553.08553.4	260	90	170	3695.86	924.972	4	-2.4	0.44	0.77	31.74
GEDSVPDTVHHVVVPVNPKTDR-MGLAISLVATEKEK-a19-b12	pr|PROT02|DDX1	pr|PROT02|DDX1	intra-protein xl	mfaini_C1912_075.c.05709.05709.5_mfaini_C1912_075.c.05700.05700.5	451	623	172	4023.1	805.628	5	0.4	0.26	0.63	31.65
LGKSHIR-VTYGQKR-a3-b6	pr|PROT02|DDX1	pr|PROT02|DDX1	intra-protein xl	mfaini_C1912_077.c.00582.00582.3_mfaini_C1912_077.c.00571.00571.3	461	693	232	1798.02	600.347	3	-2.6	0.56	0.69	31.27
EGYAWAEDKEHCEEYGR-MLQADPNKVSAR-a9-b8	pr|PROT01|HSPC117	pr|PROT01|HSPC117	intra-protein xl	mfaini_C1912_076.c.04277.04277.5_mfaini_C1912_076.c.04237.04237.5	190	206	16	3594.62	719.932	5	2.4	0.23	0.69	31.1
SQHSGNAQVTQTKFLPNAPK-MHNQIPQVTSDGKR-a13-b13	pr|PROT02|DDX1	pr|PROT02|DDX1	intra-protein xl	mfaini_C1912_077.c.02774.02774.5_mfaini_C1912_077.c.02740.02740.5	281	399	118	3899.97	781.002	5	-0.2	0.34	0.46	31.07
ZSNAAGDVGGR-KIQHVTWP-a1-b1	pr|PROT05|Ashwin	pr|PROT05|Ashwin	intra-protein xl	mfaini_C1912_074.c.03954.03954.3_mfaini_C1912_074.c.03915.03915.3	-2	225	227	2048.04	683.688	3	-1.7	0.47	0.61	31.02
APDGYIVKSQHSGNAQVTQTK-LDDLVSTGKLNLSQVR-a8-b9	pr|PROT02|DDX1	pr|PROT02|DDX1	intra-protein xl	mfaini_C1912_077.c.05260.05260.5_mfaini_C1912_077.c.05228.05228.5	268	358	90	4123.16	825.64	5	1.7	0.42	0.67	30.5
ZSNAAGDVGGR-EQHEIKNETK-a1-b6	pr|PROT05|Ashwin	pr|PROT05|Ashwin	intra-protein xl	mfaini_C1912_075.c.00575.00575.3_mfaini_C1912_075.c.00586.00586.3	-2	84	86	2295.11	766.043	3	-1.5	0.29	0.12	30.5
LTALDYHNPAGFNCKDETEFR-LGKVGR-a15-b3	pr|PROT04|CGI-99	pr|PROT04|CGI-99	intra-protein xl	mfaini_C1912_074.c.04781.04781.4_mfaini_C1912_074.c.04754.04754.4	20	241	221	3263.6	816.909	4	0.3	0.54	0.33	30.44
LDDLVSTGKLNLSQVR-ATKGLMK-a9-b3	pr|PROT02|DDX1	pr|PROT02|DDX1	intra-protein xl	mfaini_C1912_074.c.05948.05948.3_mfaini_C1912_074.c.05925.05925.3	358	126	232	2642.47	881.83	3	-0.1	0.47	0.42	30.34
KGHQFSCVCLHGDRKPHER-GKGCYNTR-a15-b2	pr|PROT02|DDX1	pr|PROT02|DDX1	intra-protein xl	mfaini_C1912_077.c.00524.00524.5_mfaini_C1912_077.c.00537.00537.5	550	636	86	3439.61	688.93	5	-2.4	0.38	0.88	30.15
ELAEQTLNNIKQFK-KQNLER-a11-b1	pr|PROT02|DDX1	pr|PROT02|DDX1	intra-protein xl	mfaini_C1912_076.c.05057.05057.3_mfaini_C1912_076.c.05038.05038.3	307	555	248	2599.39	867.472	3	-2	0.38	0.48	30.14
RPLIVFDGSSTSTSIKVK-KTENGDNDR-a16-b1	pr|PROT05|Ashwin	pr|PROT05|Ashwin	intra-protein xl	mfaini_C1912_074.c.03141.03141.3_mfaini_C1912_074.c.03121.03121.3	114	117	3	3119.61	1040.88	3	-0.9	0.35	0.59	29.46
LKPPPQASFTSNAFR-ZSNAAGDVGGR-a2-b1	pr|PROT05|Ashwin	pr|PROT05|Ashwin	intra-protein xl	mfaini_C1912_077.c.04504.04504.3_mfaini_C1912_077.c.04562.04562.3	127	-2	129	2700.36	901.128	3	-1	0.51	0.48	29.32
EDLSKIIR-IYQPKR-a5-b5	pr|PROT03|FAM98B	pr|PROT03|FAM98B	intra-protein xl	mfaini_C1912_074.c.03462.03462.3_mfaini_C1912_074.c.03431.03431.3	280	256	24	1914.09	639.039	3	-0.5	0.3	0.76	29.24
EKTACAINK-EDLSKIIR-a2-b5	pr|PROT03|FAM98B	pr|PROT03|FAM98B	intra-protein xl	mfaini_C1912_076.c.03127.03127.3_mfaini_C1912_076.c.03102.03102.3	292	280	12	2144.15	715.724	3	-1.3	0.18	0.63	29.12
EHKMDQAIIFCR-VTYGQKR-a3-b6	pr|PROT02|DDX1	pr|PROT02|DDX1	intra-protein xl	mfaini_C1912_075.c.03255.03255.4_mfaini_C1912_075.c.03235.03235.4	505	693	188	2535.27	634.826	4	-0.3	0.49	0.43	28.83
GHQFSCVCLHGDRKPHER-GKGCYNTR-a14-b2	pr|PROT02|DDX1	pr|PROT02|DDX1	intra-protein xl	mfaini_C1912_076.c.00629.00629.4_mfaini_C1912_076.c.00616.00616.4	550	636	86	3311.51	828.886	4	-3.1	0.42	0.84	28.68
DLVPDNSKTADNATK-LEYGDNAEKYK-a8-b9	pr|PROT04|CGI-99	pr|PROT04|CGI-99	intra-protein xl	mfaini_C1912_074.c.03574.03574.3_mfaini_C1912_074.c.03544.03544.3	108	98	10	3054.47	1019.16	3	-0.1	0.66	0.41	28.09
TDDVHAKDNTRPGANSPEMWSEAIK-ILKGEYAVR-a7-b3	pr|PROT02|DDX1	pr|PROT02|DDX1	intra-protein xl	mfaini_C1912_074.c.04429.04429.4_mfaini_C1912_074.c.04421.04421.4	472	493	21	3953.95	989.496	4	-1.6	0.37	0.37	27.99
LKPPPQASFTSNAFR-EQHEIKNETK-a2-b6	pr|PROT05|Ashwin	pr|PROT05|Ashwin	intra-protein xl	mfaini_C1912_077.c.02937.02937.4_mfaini_C1912_077.c.02915.02915.4	127	84	43	3052.56	764.148	4	0.2	0.45	0.36	27.89
WGKMXEK-DLPKNR-a3-b4	pr|PROT05|Ashwin	pr|PROT05|Ashwin	intra-protein xl	mfaini_C1912_074.c.02125.02125.3_mfaini_C1912_074.c.02088.02088.3	72	67	5	1803.9	602.309	3	0.8	0.54	0.86	27.85
YIDNPKLR-GLMKGK-a6-b4	pr|PROT02|DDX1	pr|PROT02|DDX1	intra-protein xl	mfaini_C1912_074.c.02538.02538.4_mfaini_C1912_074.c.02521.02521.4	317	130	187	1788	448.007	4	0.1	0.44	0.69	27.77
ALIVEPSRELAEQTLNNIKQFK-KYIDNPKLR-a19-b7	pr|PROT02|DDX1	pr|PROT02|DDX1	intra-protein xl	mfaini_C1912_074.c.07465.07465.4_mfaini_C1912_074.c.07444.07444.4	307	317	10	3824.12	957.039	4	1.4	0.43	0.35	26.82
SHNKQFDNYGEEFTMHDTIGCYLDIDK-FGFGFGGTGKK-a4-b10	pr|PROT02|DDX1	pr|PROT02|DDX1	intra-protein xl	mfaini_C1912_074.c.07990.07990.5_mfaini_C1912_074.c.07968.07968.5	177	172	5	4516.05	904.218	5	2.3	0.43	0.76	26.34
EEAEAMNNLKPPQAK-RKIQHVTWP-a10-b2	pr|PROT05|Ashwin	pr|PROT05|Ashwin	intra-protein xl	mfaini_C1912_075.c.03995.03995.3_mfaini_C1912_075.c.03973.03973.3	218	225	7	2970.53	991.186	3	-1.8	0.28	0.84	26.16
TDDVHAKDNTRPGANSPEXWSEAIK-LGKSHIR-a7-b3	pr|PROT02|DDX1	pr|PROT02|DDX1	intra-protein xl	mfaini_C1912_075.c.02391.02391.4_mfaini_C1912_075.c.02370.02370.4	472	461	11	3731.83	933.965	4	-1.5	0.29	0.85	26.08
NIHSSDWPKFFEK-DVNCPFKIQDR-a9-b7	pr|PROT04|CGI-99	pr|PROT04|CGI-99	intra-protein xl	mfaini_C1912_074.c.06445.06445.4_mfaini_C1912_074.c.06443.06443.4	58	72	14	3162.51	791.635	4	-5.1	0.43	0.34	24.81
STTSDIPHMLNQVESKVK-DILSKVQK-a16-b5	pr|PROT03|FAM98B	pr|PROT03|FAM98B	intra-protein xl	mfaini_C1912_074.c.07727.07727.4_mfaini_C1912_074.c.07689.07689.4	177	184	7	3080.64	771.167	4	-1.6	0.43	0.82	24.31
ZSNAAGDVGGR-WGKMMEK-a1-b3	pr|PROT05|Ashwin	pr|PROT05|Ashwin	intra-protein xl	mfaini_C1912_077.c.03131.03131.3_mfaini_C1912_077.c.03092.03092.3	-2	72	74	1948.91	650.646	3	0	0.21	0	23.94
NFIVWLEDQKIR-LEYGDNAEKYK-a10-b9	pr|PROT04|CGI-99	pr|PROT04|CGI-99	intra-protein xl	mfaini_C1912_074.c.08524.08524.3_mfaini_C1912_074.c.08515.08515.3	36	98	62	3026.54	1009.85	3	-0.5	0.43	0.49	23.2
KLSNSSSSVSPLILSSNLPVNNK-LKPPPQASFTSNAFR-a1-b2	pr|PROT05|Ashwin	pr|PROT05|Ashwin	intra-protein xl	mfaini_C1912_076.c.06443.06443.4_mfaini_C1912_076.c.06421.06421.4	141	127	14	4182.24	1046.57	4	2.3	0.5	0.74	22.61
ELAEQTLNNIKQFKK-YIDNPKLR-a14-b6	pr|PROT02|DDX1	pr|PROT02|DDX1	intra-protein xl	mfaini_C1912_075.c.05213.05213.4_mfaini_C1912_075.c.05183.05183.4	310	317	7	2958.62	740.663	4	0.3	0.53	0.64	22.2
STTSDIPHXLNQVESKVK-DILSKVQK-a16-b5	pr|PROT03|FAM98B	pr|PROT03|FAM98B	intra-protein xl	mfaini_C1912_075.c.05977.05977.4_mfaini_C1912_075.c.05946.05946.4	177	184	7	3096.64	775.168	4	0.7	0.38	0.8	22.16
YIDNPKLR-DQQEGKK-a6-b6	pr|PROT02|DDX1	pr|PROT02|DDX1	intra-protein xl	mfaini_C1912_074.c.01506.01506.4_mfaini_C1912_074.c.01507.01507.4	317	75	242	1987.04	497.768	4	2.5	0.32	0.75	21.25

## Sheet: Replicate 2
Id	Protein1	Protein2	XLType	Spectrum	AbsPos1	AbsPos2	deltaAA	Mr	Mz	z	Error_rel[ppm]	TIC	deltaS	ld-Score
INEAIVAVQAIIADPKTDHR-IYQPKR-a16-b5	pr|PROT04|CGI-99	pr|PROT03|FAM98B	inter-protein xl	mfaini_C1912_056.c.06211.06211.5_mfaini_C1912_056.c.06181.06181.5	234	256		3114.72	623.951	5	-0.6	0.61	0.52	45.17
VKTDDIAR-LGKVGR-a2-b3	pr|PROT03|FAM98B	pr|PROT04|CGI-99	inter-protein xl	mfaini_C1912_055.c.01170.01170.4_mfaini_C1912_055.c.01117.01117.4	245	241		1682.96	421.749	4	-1.7	0.51	0	45.16
MHNQIPQVTSDGKR-DKIIVNDR-a13-b2	pr|PROT02|DDX1	pr|PROT01|HSPC117	inter-protein xl	mfaini_C1912_056.c.02518.02518.4_mfaini_C1912_056.c.02485.02485.4	399	285		2719.41	680.86	4	0.3	0.45	0.53	44.54
VASPKLVMEEAPESYK-LGKSHIR-a5-b3	pr|PROT01|HSPC117	pr|PROT02|DDX1	inter-protein xl	mfaini_C1912_056.c.03352.03352.4_mfaini_C1912_056.c.03344.03344.4	465	461		2724.45	682.12	4	-1.3	0.45	0.84	44.09
VKTDDIAR-HYKIEDR-a2-b3	pr|PROT03|FAM98B	pr|PROT04|CGI-99	inter-protein xl	mfaini_C1912_055.c.01159.01159.3_mfaini_C1912_055.c.01216.01216.3	245	41		2014.05	672.357	3	-0.6	0.46	0.71	43.72
ZSNAAGDVGGR-FFEKYLR-a1-b4	pr|PROT05|Ashwin	pr|PROT04|CGI-99	inter-protein xl	mfaini_C1912_053.c.04901.04901.3_mfaini_C1912_053.c.04868.04868.3	-2	62		2042.02	681.681	3	-0.9	0.53	0	43.53
EHKMDQAIIFCR-DKIIVNDR-a3-b2	pr|PROT02|DDX1	pr|PROT01|HSPC117	inter-protein xl	mfaini_C1912_055.c.04445.04445.4_mfaini_C1912_055.c.04415.04415.4	505	285		2656.34	665.093	4	-1.6	0.43	0.69	42.75
KGHQFSCVCLHGDR-DKIIVNDR-a1-b2	pr|PROT02|DDX1	pr|PROT01|HSPC117	inter-protein xl	mfaini_C1912_054.c.01917.01917.3_mfaini_C1912_054.c.01905.01905.3	536	285		2809.37	937.465	3	-1	0.37	0.8	42.29
ZSNAAGDVGGR-HYKIEDR-a1-b3	pr|PROT05|Ashwin	pr|PROT04|CGI-99	inter-protein xl	mfaini_C1912_054.c.01174.01174.3_mfaini_C1912_054.c.01130.01130.3	-2	41		1999.97	667.665	3	-0.2	0.43	0.26	42.27
YALSPKTTITMAHLLAAR-HDDYLVMLKAIR-a6-b9	pr|PROT03|FAM98B	pr|PROT04|CGI-99	inter-protein xl	mfaini_C1912_054.c.08525.08525.4_mfaini_C1912_054.c.08536.08536.4	263	154		3567.91	892.986	4	-4.8	0.41	0.44	42.03
KLTALDYHNPAGFNCKDETEFR-ZSNAAGDVGGR-a16-b1	pr|PROT04|CGI-99	pr|PROT05|Ashwin	inter-protein xl	mfaini_C1912_053.c.04220.04220.4_mfaini_C1912_053.c.04177.04177.4	20	-2		3665.72	917.437	4	0.2	0.52	0.43	41.69
LKPPPQASFTSNAFR-LGKVGR-a2-b3	pr|PROT05|Ashwin	pr|PROT04|CGI-99	inter-protein xl	mfaini_C1912_054.c.03614.03614.4_mfaini_C1912_054.c.03606.03606.4	127	241		2426.34	607.592	4	-2.1	0.38	0.4	41.27
ANQTKEGLPVALDK-NHVGKPLLK-a5-b5	pr|PROT04|CGI-99	pr|PROT03|FAM98B	inter-protein xl	mfaini_C1912_054.c.03133.03133.4_mfaini_C1912_054.c.03092.03092.4	176	192		2625.48	657.379	4	-0.5	0.4	0.79	41.18
LTALDYHNPAGFNCKDETEFR-ZSNAAGDVGGR-a15-b1	pr|PROT04|CGI-99	pr|PROT05|Ashwin	inter-protein xl	mfaini_C1912_056.c.04879.04879.4_mfaini_C1912_056.c.04857.04857.4	20	-2		3537.62	885.412	4	-1.1	0.46	0.18	41.16
EHKMDQAIIFCR-ZSNAAGDVGGR-a3-b1	pr|PROT02|DDX1	pr|PROT05|Ashwin	inter-protein xl	mfaini_C1912_054.c.03750.03750.4_mfaini_C1912_054.c.03713.03713.4	505	-2		2587.22	647.814	4	-0.7	0.43	0.18	40.93
KRPLIVFDGSSTSTSIK-LGKSHIR-a1-b3	pr|PROT05|Ashwin	pr|PROT02|DDX1	inter-protein xl	mfaini_C1912_055.c.02703.02703.4_mfaini_C1912_055.c.02695.02695.4	98	461		2782.57	696.65	4	-1.2	0.49	0.82	40.9
LTALDYHNPAGFNCKDETEFR-EVKEWHGCR-a15-b3	pr|PROT04|CGI-99	pr|PROT02|DDX1	inter-protein xl	mfaini_C1912_055.c.04330.04330.4_mfaini_C1912_055.c.04310.04310.4	20	117		3834.75	959.696	4	0	0.29	0.27	40.35
TKIDCDNLEQYFIQQGGGPDK-DKIIVNDR-a2-b2	pr|PROT02|DDX1	pr|PROT01|HSPC117	inter-protein xl	mfaini_C1912_053.c.07350.07350.4_mfaini_C1912_053.c.07333.07333.4	516	285		3534.73	884.691	4	0.7	0.39	0.34	39.93
TDDVHAKDNTRPGANSPEMWSEAIK-ZSNAAGDVGGR-a7-b1	pr|PROT02|DDX1	pr|PROT05|Ashwin	inter-protein xl	mfaini_C1912_056.c.03555.03555.4_mfaini_C1912_056.c.03529.03529.4	472	-2		3808.77	953.199	4	-1.4	0.55	0.15	39.68
KRPLIVFDGSSTSTSIK-IYQPKR-a1-b5	pr|PROT05|Ashwin	pr|PROT03|FAM98B	inter-protein xl	mfaini_C1912_056.c.03374.03374.4_mfaini_C1912_056.c.03383.03383.4	98	256		2776.55	695.145	4	0.5	0.51	0.29	39.64
HDDYLVMLKAIR-IYQPKR-a9-b5	pr|PROT04|CGI-99	pr|PROT03|FAM98B	inter-protein xl	mfaini_C1912_055.c.05553.05553.4_mfaini_C1912_055.c.05533.05533.4	154	256		2414.31	604.586	4	-1.1	0.75	0.71	39.62
AAGGGSYKGHVDILAPTVQELAALEK-ZSNAAGDVGGR-a8-b1	pr|PROT02|DDX1	pr|PROT05|Ashwin	inter-protein xl	mfaini_C1912_053.c.07440.07440.3_mfaini_C1912_053.c.07431.07431.3	702	-2		3634.87	1212.63	3	2.8	0.37	0.32	38.41
EQHEIKNETK-HYKIEDR-a6-b3	pr|PROT05|Ashwin	pr|PROT04|CGI-99	inter-protein xl	mfaini_C1912_055.c.00436.00436.4_mfaini_C1912_055.c.00437.00437.4	84	41		2352.16	589.049	4	-3.2	0.33	0.2	38.34
YKDLVPDNSK-IYQPKR-a2-b5	pr|PROT04|CGI-99	pr|PROT03|FAM98B	inter-protein xl	mfaini_C1912_055.c.02359.02359.4_mfaini_C1912_055.c.02363.02363.4	100	256		2119.13	530.789	4	-2.6	0.47	0.42	38.12
KRPLIVFDGSSTSTSIK-FFEKYLR-a1-b4	pr|PROT05|Ashwin	pr|PROT04|CGI-99	inter-protein xl	mfaini_C1912_055.c.06085.06085.4_mfaini_C1912_055.c.06069.06069.4	98	62		2974.61	744.66	4	-2.7	0.5	0.36	38.02
HDDYLVMLKAIR-EDLSKIIR-a9-b5	pr|PROT04|CGI-99	pr|PROT03|FAM98B	inter-protein xl	mfaini_C1912_056.c.07545.07545.4_mfaini_C1912_056.c.07534.07534.4	154	280		2583.41	646.86	4	-0.6	0.34	0.83	38
LTQDAVAKANQTK-DILSKVQK-a8-b5	pr|PROT04|CGI-99	pr|PROT03|FAM98B	inter-protein xl	mfaini_C1912_055.c.03652.03652.3_mfaini_C1912_055.c.03623.03623.3	171	184		2454.37	819.132	3	0.9	0.51	0.38	37.88
VASPKLVMEEAPESYK-MHNQIPQVTSDGKR-a5-b13	pr|PROT01|HSPC117	pr|PROT02|DDX1	inter-protein xl	mfaini_C1912_053.c.04236.04236.5_mfaini_C1912_053.c.04217.04217.5	465	399		3524.75	705.959	5	-2.9	0.39	0.29	37.7
LTQDAVAKANQTK-IYQPKR-a8-b5	pr|PROT04|CGI-99	pr|PROT03|FAM98B	inter-protein xl	mfaini_C1912_054.c.01449.01449.4_mfaini_C1912_054.c.01413.01413.4	171	256		2328.28	583.077	4	-2.1	0.48	0.3	37.58
HDDYLVMLKAIR-ZSNAAGDVGGR-a9-b1	pr|PROT04|CGI-99	pr|PROT05|Ashwin	inter-protein xl	mfaini_C1912_053.c.06690.06690.4_mfaini_C1912_053.c.06666.06666.4	154	-2		2513.26	629.323	4	-2.9	0.39	0.36	37.57
HDDYLVMLKAIR-VKDILSK-a9-b2	pr|PROT04|CGI-99	pr|PROT03|FAM98B	inter-protein xl	mfaini_C1912_055.c.06732.06732.4_mfaini_C1912_055.c.06720.06720.4	154	179		2412.34	604.094	4	-0.8	0.59	0.84	37.41
LDDLVSTGKLNLSQVR-VASPKLVMEEAPESYK-a9-b5	pr|PROT02|DDX1	pr|PROT01|HSPC117	inter-protein xl	mfaini_C1912_053.c.07574.07574.4_mfaini_C1912_053.c.07543.07543.4	358	465		3671.93	918.989	4	-1.9	0.41	0.53	37.26
KGHQFSCVCLHGDR-ZSNAAGDVGGR-a1-b1	pr|PROT02|DDX1	pr|PROT05|Ashwin	inter-protein xl	mfaini_C1912_056.c.01594.01594.3_mfaini_C1912_056.c.01588.01588.3	536	-2		2740.25	914.426	3	-0.8	0.42	0	37.24
EQHEIKNETK-FFEKYLR-a6-b4	pr|PROT05|Ashwin	pr|PROT04|CGI-99	inter-protein xl	mfaini_C1912_053.c.02915.02915.5_mfaini_C1912_053.c.02900.02900.5	84	62		2394.22	479.851	5	-1.7	0.24	0.48	37.1
ANQTKEGLPVALDK-EDLSKIIR-a5-b5	pr|PROT04|CGI-99	pr|PROT03|FAM98B	inter-protein xl	mfaini_C1912_056.c.05244.05244.3_mfaini_C1912_056.c.05231.05231.3	176	280		2593.43	865.485	3	-0.2	0.34	0.42	37
LTALDYHNPAGFNCKDETEFR-VNKDSLTDLYVQHAIPLPQR-a15-b3	pr|PROT04|CGI-99	pr|PROT05|Ashwin	inter-protein xl	mfaini_C1912_056.c.07145.07145.5_mfaini_C1912_056.c.07124.07124.5	20	46		4941.45	989.297	5	1.5	0.35	0.49	36.96
EGLPVALDKHILGFDTGDAVLNEAAQILR-NVTDVVNTCHDAGISKK-a9-b16	pr|PROT04|CGI-99	pr|PROT01|HSPC117	inter-protein xl	mfaini_C1912_053.c.09950.09950.4_mfaini_C1912_053.c.10017.10017.4	185	492		5069.61	1268.41	4	-0.6	0.31	0.67	36.83
IYQPKR-LGKVGR-a5-b3	pr|PROT03|FAM98B	pr|PROT04|CGI-99	inter-protein xl	mfaini_C1912_053.c.00981.00981.4_mfaini_C1912_053.c.00937.00937.4	256	241		1569.93	393.491	4	-1.8	0.39	0	36.67
ZSNAAGDVGGR-LGKSHIR-a1-b3	pr|PROT05|Ashwin	pr|PROT02|DDX1	inter-protein xl	mfaini_C1912_055.c.00675.00675.3_mfaini_C1912_055.c.00654.00654.3	-2	461		1849.98	617.667	3	0.4	0.39	0.8	36.66
LKPPPQASFTSNAFR-VKTDDIAR-a2-b2	pr|PROT05|Ashwin	pr|PROT03|FAM98B	inter-protein xl	mfaini_C1912_055.c.03936.03936.4_mfaini_C1912_055.c.03911.03911.4	127	245		2714.43	679.616	4	-1.8	0.37	0.49	36.28
KRPLIVFDGSSTSTSIK-HYKIEDR-a1-b3	pr|PROT05|Ashwin	pr|PROT04|CGI-99	inter-protein xl	mfaini_C1912_053.c.03340.03340.4_mfaini_C1912_053.c.03288.03288.4	98	41		2932.57	734.149	4	-0.4	0.38	0.37	36.02
TDDVHAKDNTRPGANSPEMWSEAIK-DKIIVNDR-a7-b2	pr|PROT02|DDX1	pr|PROT01|HSPC117	inter-protein xl	mfaini_C1912_055.c.04129.04129.5_mfaini_C1912_055.c.04075.04075.5	472	285		3877.89	776.586	5	-0.4	0.5	0.38	35.9
NIHSSDWPKFFEK-ZSNAAGDVGGR-a9-b1	pr|PROT04|CGI-99	pr|PROT05|Ashwin	inter-protein xl	mfaini_C1912_056.c.04880.04880.4_mfaini_C1912_056.c.04723.04723.4	58	-2		2674.28	669.578	4	1.4	0.6	0.3	35.58
EDLSKIIR-KMGIDHK-a5-b1	pr|PROT03|FAM98B	pr|PROT01|HSPC117	inter-protein xl	mfaini_C1912_055.c.02766.02766.4_mfaini_C1912_055.c.02734.02734.4	280	245		1938.06	485.523	4	-0.7	0.31	0.64	35.54
LTALDYHNPAGFNCKDETEFR-KTENGDNDR-a15-b1	pr|PROT04|CGI-99	pr|PROT05|Ashwin	inter-protein xl	mfaini_C1912_055.c.03811.03811.4_mfaini_C1912_055.c.03790.03790.4	20	117		3682.65	921.671	4	-1.4	0.34	0.19	35.5
VNKDSLTDLYVQHAIPLPQR-LGKSHIR-a3-b3	pr|PROT05|Ashwin	pr|PROT02|DDX1	inter-protein xl	mfaini_C1912_056.c.04951.04951.4_mfaini_C1912_056.c.04903.04903.4	46	461		3253.8	814.458	4	1.8	0.28	0.85	35.37
KEDCLKLLLFLSTELQASQILQNK-DVNCPFKIQDR-a6-b7	pr|PROT03|FAM98B	pr|PROT04|CGI-99	inter-protein xl	mfaini_C1912_055.c.11247.11247.5_mfaini_C1912_055.c.11282.11282.5	115	72		4360.28	873.064	5	0.4	0.35	0.85	35.35
ANQTKEGLPVALDK-KMGIDHK-a5-b1	pr|PROT04|CGI-99	pr|PROT01|HSPC117	inter-protein xl	mfaini_C1912_054.c.02583.02583.4_mfaini_C1912_054.c.02563.02563.4	176	245		2448.3	613.083	4	-1.4	0.31	0.78	35.33
VEQHVVDGKER-LGKVGR-a9-b3	pr|PROT01|HSPC117	pr|PROT04|CGI-99	inter-protein xl	mfaini_C1912_056.c.00675.00675.4_mfaini_C1912_056.c.00664.00664.4	366	241		2061.13	516.29	4	-2.2	0.29	0.54	35.09
ZSNAAGDVGGR-VKTDDIAR-a1-b2	pr|PROT05|Ashwin	pr|PROT03|FAM98B	inter-protein xl	mfaini_C1912_053.c.01679.01679.3_mfaini_C1912_053.c.01646.01646.3	-2	245		1956.98	653.335	3	-3	0.47	0	35.08
GPEPGPQPTMEGDVLDTLEALGYKGPLLEEQALTK-YKDLVPDNSK-a24-b2	pr|PROT03|FAM98B	pr|PROT04|CGI-99	inter-protein xl	mfaini_C1912_055.c.11742.11742.4_mfaini_C1912_055.c.11773.11773.4	26	100		5008.52	1253.14	4	0.2	0.43	0.24	34.91
ZSNAAGDVGGR-ILKGEYAVR-a1-b3	pr|PROT05|Ashwin	pr|PROT02|DDX1	inter-protein xl	mfaini_C1912_056.c.02872.02872.3_mfaini_C1912_056.c.02860.02860.3	-2	493		2088.09	697.039	3	-1.1	0.41	0.43	34.81
DKIIVNDR-LGKSHIR-a2-b3	pr|PROT01|HSPC117	pr|PROT02|DDX1	inter-protein xl	mfaini_C1912_056.c.01536.01536.3_mfaini_C1912_056.c.01502.01502.3	285	461		1919.09	640.706	3	-1.1	0.49	0.79	34.8
MLQADPNKVSAR-VTYGQKR-a8-b6	pr|PROT01|HSPC117	pr|PROT02|DDX1	inter-protein xl	mfaini_C1912_056.c.01854.01854.4_mfaini_C1912_056.c.01836.01836.4	206	693		2317.22	580.312	4	-1.4	0.59	0.57	34.72
WGKMMEK-LGKVGR-a3-b3	pr|PROT05|Ashwin	pr|PROT04|CGI-99	inter-protein xl	mfaini_C1912_054.c.02275.02275.3_mfaini_C1912_054.c.02244.02244.3	72	241		1674.89	559.306	3	-0.9	0.28	0.33	34.62
KRPLIVFDGSSTSTSIK-LGKVGR-a1-b3	pr|PROT05|Ashwin	pr|PROT04|CGI-99	inter-protein xl	mfaini_C1912_055.c.03516.03516.4_mfaini_C1912_055.c.03478.03478.4	98	241		2601.49	651.381	4	2.8	0.54	0.23	34.61
LEYGDNAEKYK-IYQPKR-a9-b5	pr|PROT04|CGI-99	pr|PROT03|FAM98B	inter-protein xl	mfaini_C1912_054.c.01916.01916.4_mfaini_C1912_054.c.01911.01911.4	98	256		2270.16	568.547	4	-0.3	0.53	0.57	34.51
LTQDAVAKANQTK-ZSNAAGDVGGR-a8-b1	pr|PROT04|CGI-99	pr|PROT05|Ashwin	inter-protein xl	mfaini_C1912_056.c.01846.01846.3_mfaini_C1912_056.c.01822.01822.3	171	-2		2427.23	810.085	3	-1.3	0.46	0.31	34.4
VPVDEFDGKVTYGQK-ZSNAAGDVGGR-a9-b1	pr|PROT02|DDX1	pr|PROT05|Ashwin	inter-protein xl	mfaini_C1912_054.c.04280.04280.3_mfaini_C1912_054.c.04258.04258.3	687	-2		2721.32	908.115	3	-0.9	0.57	0.43	33.96
INEAIVAVQAIIADPKTDHR-VKTDDIAR-a16-b2	pr|PROT04|CGI-99	pr|PROT03|FAM98B	inter-protein xl	mfaini_C1912_054.c.06414.06414.4_mfaini_C1912_054.c.06389.06389.4	234	245		3227.75	807.946	4	0.2	0.61	0.42	33.92
LTQDAVAKANQTK-EKTACAINK-a8-b2	pr|PROT04|CGI-99	pr|PROT03|FAM98B	inter-protein xl	mfaini_C1912_056.c.01480.01480.4_mfaini_C1912_056.c.01447.01447.4	171	292		2558.34	640.592	4	0.1	0.33	0.36	33.72
VEQHVVDGKER-KQNLER-a9-b1	pr|PROT01|HSPC117	pr|PROT02|DDX1	inter-protein xl	mfaini_C1912_056.c.00531.00531.3_mfaini_C1912_056.c.00528.00528.3	366	555		2219.16	740.728	3	-2.5	0.49	0.82	33.71
VEQHVVDGKER-ZSNAAGDVGGR-a9-b1	pr|PROT01|HSPC117	pr|PROT05|Ashwin	inter-protein xl	mfaini_C1912_053.c.00920.00920.3_mfaini_C1912_053.c.00877.00877.3	366	-2		2335.15	779.391	3	-0.9	0.57	0.34	33.67
EQLAQAMFDHIPVGVGSKGVIPMNAK-ZSNAAGDVGGR-a18-b1	pr|PROT01|HSPC117	pr|PROT05|Ashwin	inter-protein xl	mfaini_C1912_055.c.07596.07596.4_mfaini_C1912_055.c.07557.07557.4	158	-2		3776.89	945.231	4	-1.5	0.39	0.47	33.66
MLQADPNKVSAR-ZSNAAGDVGGR-a8-b1	pr|PROT01|HSPC117	pr|PROT05|Ashwin	inter-protein xl	mfaini_C1912_056.c.02504.02504.3_mfaini_C1912_056.c.02553.02553.3	206	-2		2369.17	790.732	3	-1	0.64	0.43	33.6
DKIIVNDR-KQNLER-a2-b1	pr|PROT01|HSPC117	pr|PROT02|DDX1	inter-protein xl	mfaini_C1912_054.c.01629.01629.3_mfaini_C1912_054.c.01605.01605.3	285	555		1896.04	633.021	3	-1.6	0.42	0.59	33.53
KRPLIVFDGSSTSTSIK-VKTDDIAR-a1-b2	pr|PROT05|Ashwin	pr|PROT03|FAM98B	inter-protein xl	mfaini_C1912_056.c.03682.03682.4_mfaini_C1912_056.c.03649.03649.4	98	245		2889.57	723.401	4	-2.7	0.46	0.38	33.37
EKTACAINK-LGKVGR-a2-b3	pr|PROT03|FAM98B	pr|PROT04|CGI-99	inter-protein xl	mfaini_C1912_055.c.00781.00781.4_mfaini_C1912_055.c.00755.00755.4	292	241		1799.99	451.006	4	0	0.24	0.43	33.25
KLTALDYHNPAGFNCKDETEFR-GKGCYNTR-a16-b2	pr|PROT04|CGI-99	pr|PROT02|DDX1	inter-protein xl	mfaini_C1912_055.c.03418.03418.4_mfaini_C1912_055.c.03372.03372.4	20	636		3717.72	930.437	4	-3.9	0.44	0.23	33.13
LTQDAVAKANQTK-KMGIDHK-a8-b1	pr|PROT04|CGI-99	pr|PROT01|HSPC117	inter-protein xl	mfaini_C1912_056.c.01156.01156.4_mfaini_C1912_056.c.01122.01122.4	171	245		2352.24	589.068	4	-3.1	0.33	0.49	33.06
VASPKLVMEEAPESYK-MGLAISLVATEKEK-a5-b12	pr|PROT01|HSPC117	pr|PROT02|DDX1	inter-protein xl	mfaini_C1912_055.c.07368.07368.4_mfaini_C1912_055.c.07361.07361.4	465	623		3403.79	851.956	4	1.4	0.32	0.59	32.87
TDDVHAKDNTRPGANSPEMWSEAIK-VEQHVVDGKER-a7-b9	pr|PROT02|DDX1	pr|PROT01|HSPC117	inter-protein xl	mfaini_C1912_053.c.02822.02822.4_mfaini_C1912_053.c.02803.02803.4	472	366		4201.01	1051.26	4	-0.4	0.41	0.31	32.86
XLQADPNKVSAR-ZSNAAGDVGGR-a8-b1	pr|PROT01|HSPC117	pr|PROT05|Ashwin	inter-protein xl	mfaini_C1912_054.c.01927.01927.3_mfaini_C1912_054.c.01913.01913.3	206	-2		2385.16	796.063	3	-2.2	0.44	0	32.83
LTQDAVAKANQTK-VQKNHVGKPLLK-a8-b3	pr|PROT04|CGI-99	pr|PROT03|FAM98B	inter-protein xl	mfaini_C1912_056.c.01069.01069.3_mfaini_C1912_056.c.01004.01004.3	171	187		2884.65	962.557	3	-0.9	0.38	0.32	32.81
LTALDYHNPAGFNCKDETEFR-GKGCYNTR-a15-b2	pr|PROT04|CGI-99	pr|PROT02|DDX1	inter-protein xl	mfaini_C1912_053.c.04122.04122.4_mfaini_C1912_053.c.04100.04100.4	20	636		3589.63	898.415	4	-1.8	0.53	0	32.73
VEQHVVDGKER-EVKEWHGCR-a9-b3	pr|PROT01|HSPC117	pr|PROT02|DDX1	inter-protein xl	mfaini_C1912_053.c.00895.00895.4_mfaini_C1912_053.c.00872.00872.4	366	117		2632.28	659.079	4	0.8	0.23	0.74	32.64
EVKEWHGCR-DKIIVNDR-a3-b2	pr|PROT02|DDX1	pr|PROT01|HSPC117	inter-protein xl	mfaini_C1912_055.c.02278.02278.3_mfaini_C1912_055.c.02243.02243.3	117	285		2309.16	770.726	3	-1.1	0.26	0.7	32.58
YKDLVPDNSK-DLPKNR-a2-b4	pr|PROT04|CGI-99	pr|PROT05|Ashwin	inter-protein xl	mfaini_C1912_056.c.02549.02549.3_mfaini_C1912_056.c.02507.02507.3	100	67		2057.08	686.7	3	-0.7	0.45	0.82	32.57
ZSNAAGDVGGR-IYQPKR-a1-b5	pr|PROT05|Ashwin	pr|PROT03|FAM98B	inter-protein xl	mfaini_C1912_053.c.01458.01458.3_mfaini_C1912_053.c.01428.01428.3	-2	256		1843.95	615.659	3	-0.8	0.39	0.27	32.31
RAAGGGSYKGHVDILAPTVQELAALEK-ZSNAAGDVGGR-a9-b1	pr|PROT02|DDX1	pr|PROT05|Ashwin	inter-protein xl	mfaini_C1912_053.c.06465.06465.4_mfaini_C1912_053.c.06468.06468.4	702	-2		3790.95	948.746	4	-2.2	0.54	0.33	32.27
LKPPPQASFTSNAFR-FFEKYLR-a2-b4	pr|PROT05|Ashwin	pr|PROT04|CGI-99	inter-protein xl	mfaini_C1912_054.c.06214.06214.4_mfaini_C1912_054.c.06195.06195.4	127	62		2799.47	700.877	4	0.2	0.34	0.48	32.25
LEYGDNAEKYK-WGKMMEK-a9-b3	pr|PROT04|CGI-99	pr|PROT05|Ashwin	inter-protein xl	mfaini_C1912_056.c.03455.03455.3_mfaini_C1912_056.c.03417.03417.3	98	72		2375.11	792.712	3	-1.9	0.43	0.01	32.14
INEAIVAVQAIIADPKTDHR-ZSNAAGDVGGR-a16-b1	pr|PROT04|CGI-99	pr|PROT05|Ashwin	inter-protein xl	mfaini_C1912_056.c.07057.07057.4_mfaini_C1912_056.c.06998.06998.4	234	-2		3213.67	804.426	4	-0.2	0.66	0.5	31.95
EQHEIKNETK-IRHYKIEDR-a6-b5	pr|PROT05|Ashwin	pr|PROT04|CGI-99	inter-protein xl	mfaini_C1912_056.c.00463.00463.4_mfaini_C1912_056.c.00466.00466.4	84	41		2621.35	656.345	4	-2.6	0.24	0.46	31.91
VASPKLVMEEAPESYK-EVKEWHGCR-a5-b3	pr|PROT01|HSPC117	pr|PROT02|DDX1	inter-protein xl	mfaini_C1912_054.c.04025.04025.4_mfaini_C1912_054.c.03994.03994.4	465	117		3114.51	779.636	4	-1.4	0.33	0.37	31.79
EQHEIKNETK-VKTDDIAR-a6-b2	pr|PROT05|Ashwin	pr|PROT03|FAM98B	inter-protein xl	mfaini_C1912_053.c.00471.00471.3_mfaini_C1912_053.c.00502.00502.3	84	245		2309.18	770.736	3	-1.4	0.4	0.34	31.6
TDDVHAKDNTRPGANSPEMWSEAIK-LTALDYHNPAGFNCKDETEFR-a7-b15	pr|PROT02|DDX1	pr|PROT04|CGI-99	inter-protein xl	mfaini_C1912_056.c.05363.05363.5_mfaini_C1912_056.c.05320.05320.5	472	20		5403.49	1081.7	5	0.7	0.36	0.29	31.57
LKPPPQASFTSNAFR-DVNCPFKIQDR-a2-b7	pr|PROT05|Ashwin	pr|PROT04|CGI-99	inter-protein xl	mfaini_C1912_055.c.05790.05790.4_mfaini_C1912_055.c.05795.05795.4	127	72		3188.6	798.158	4	-2.2	0.3	0.72	31.49
LTALDYHNPAGFNCKDETEFR-LKPPPQASFTSNAFR-a15-b2	pr|PROT04|CGI-99	pr|PROT05|Ashwin	inter-protein xl	mfaini_C1912_056.c.05991.05991.5_mfaini_C1912_056.c.05938.05938.5	20	127		4295.06	860.021	5	-2.5	0.33	0.39	31.49
DVNCPFKIQDR-KKEDCLK-a7-b2	pr|PROT04|CGI-99	pr|PROT03|FAM98B	inter-protein xl	mfaini_C1912_055.c.02419.02419.3_mfaini_C1912_055.c.02389.02389.3	72	110		2448.2	817.076	3	-3.8	0.4	0.88	31.18
EQHEIKNETKR-FFEKYLR-a6-b4	pr|PROT05|Ashwin	pr|PROT04|CGI-99	inter-protein xl	mfaini_C1912_055.c.02089.02089.4_mfaini_C1912_055.c.02286.02286.4	84	62		2550.32	638.588	4	-0.6	0.32	0.7	31.12
EVKEWHGCR-LGKVGR-a3-b3	pr|PROT02|DDX1	pr|PROT04|CGI-99	inter-protein xl	mfaini_C1912_056.c.01321.01321.4_mfaini_C1912_056.c.01240.01240.4	117	241		1966.02	492.513	4	-0.7	0.25	0	31.01
LTALDYHNPAGFNCKDETEFR-KQNLER-a15-b1	pr|PROT04|CGI-99	pr|PROT02|DDX1	inter-protein xl	mfaini_C1912_055.c.04098.04098.4_mfaini_C1912_055.c.04064.04064.4	20	555		3421.64	856.418	4	0.9	0.51	0.33	30.71
LEYGDNAEKYK-HKNSQLDK-a9-b2	pr|PROT04|CGI-99	pr|PROT03|FAM98B	inter-protein xl	mfaini_C1912_054.c.00835.00835.3_mfaini_C1912_054.c.00820.00820.3	98	136		2435.19	812.739	3	-1.1	0.52	0.71	30.64
VNKDSLTDLYVQHAIPLPQR-IYQPKR-a3-b5	pr|PROT05|Ashwin	pr|PROT03|FAM98B	inter-protein xl	mfaini_C1912_056.c.05548.05548.4_mfaini_C1912_056.c.05526.05526.4	46	256		3247.77	812.951	4	0.4	0.34	0.46	30.58
REQHEIKNETK-FFEKYLR-a7-b4	pr|PROT05|Ashwin	pr|PROT04|CGI-99	inter-protein xl	mfaini_C1912_054.c.02121.02121.4_mfaini_C1912_054.c.01966.01966.4	84	62		2550.32	638.588	4	-0.1	0.35	0.72	30.18
LEYGDNAEKYK-ZSNAAGDVGGR-a9-b1	pr|PROT04|CGI-99	pr|PROT05|Ashwin	inter-protein xl	mfaini_C1912_056.c.02596.02596.3_mfaini_C1912_056.c.02561.02561.3	98	-2		2369.11	790.71	3	-3.5	0.42	0	30.15
DKIIVNDR-VTYGQKR-a2-b6	pr|PROT01|HSPC117	pr|PROT02|DDX1	inter-protein xl	mfaini_C1912_054.c.01815.01815.3_mfaini_C1912_054.c.01792.01792.3	285	693		1960.07	654.365	3	-1.4	0.35	0	30.13
AAGGGSYKGHVDILAPTVQELAALEK-MLQADPNKVSAR-a8-b8	pr|PROT02|DDX1	pr|PROT01|HSPC117	inter-protein xl	mfaini_C1912_056.c.06932.06932.4_mfaini_C1912_056.c.06927.06927.4	702	206		4061.13	1016.29	4	0.1	0.41	0.26	30.12
IASPEGQDYLKGMAAAGNYAWVNR-ZSNAAGDVGGR-a11-b1	pr|PROT01|HSPC117	pr|PROT05|Ashwin	inter-protein xl	mfaini_C1912_053.c.07821.07821.3_mfaini_C1912_053.c.07891.07891.3	308	-2		3621.73	1208.25	3	0.4	0.45	0.3	30.05
LTALDYHNPAGFNCKDETEFR-IYQPKR-a15-b5	pr|PROT04|CGI-99	pr|PROT03|FAM98B	inter-protein xl	mfaini_C1912_054.c.04201.04201.4_mfaini_C1912_054.c.04171.04171.4	20	256		3438.67	860.676	4	1.6	0.41	0.78	30
VEQHVVDGKER-HYKIEDR-a9-b3	pr|PROT01|HSPC117	pr|PROT04|CGI-99	inter-protein xl	mfaini_C1912_053.c.00639.00639.4_mfaini_C1912_053.c.00629.00629.4	366	41		2392.21	599.06	4	-1.3	0.26	0.65	29.77
LKPPPQASFTSNAFR-IYQPKR-a2-b5	pr|PROT05|Ashwin	pr|PROT03|FAM98B	inter-protein xl	mfaini_C1912_055.c.03635.03635.4_mfaini_C1912_055.c.03597.03597.4	127	256		2601.4	651.357	4	-3.3	0.25	0.8	29.54
LDDLVSTGKLNLSQVR-LKPPPQASFTSNAFR-a9-b2	pr|PROT02|DDX1	pr|PROT05|Ashwin	inter-protein xl	mfaini_C1912_055.c.07058.07058.4_mfaini_C1912_055.c.07026.07026.4	358	127		3554.9	889.733	4	-2.1	0.54	0.7	29.48
MLQADPNKVSAR-LGKSHIR-a8-b3	pr|PROT01|HSPC117	pr|PROT02|DDX1	inter-protein xl	mfaini_C1912_055.c.01515.01515.4_mfaini_C1912_055.c.01500.01500.4	206	461		2276.24	570.068	4	-0.8	0.47	0.88	29.45
VEQHVVDGKER-VTYGQKR-a9-b6	pr|PROT01|HSPC117	pr|PROT02|DDX1	inter-protein xl	mfaini_C1912_056.c.00603.00603.4_mfaini_C1912_056.c.00587.00587.4	366	693		2283.2	571.808	4	1.3	0.74	0.6	29.43
ZSNAAGDVGGR-EVKEWHGCR-a1-b3	pr|PROT05|Ashwin	pr|PROT02|DDX1	inter-protein xl	mfaini_C1912_055.c.01650.01650.3_mfaini_C1912_055.c.01629.01629.3	-2	117		2240.04	747.687	3	-0.8	0.25	0	29.37
HDDYLVMLKAIR-DILSKVQK-a9-b5	pr|PROT04|CGI-99	pr|PROT03|FAM98B	inter-protein xl	mfaini_C1912_055.c.07700.07700.4_mfaini_C1912_055.c.07679.07679.4	154	184		2540.41	636.11	4	1.3	0.61	0.61	29.17
LTALDYHNPAGFNCKDETEFR-VTYGQKR-a15-b6	pr|PROT04|CGI-99	pr|PROT02|DDX1	inter-protein xl	mfaini_C1912_054.c.04102.04102.5_mfaini_C1912_054.c.04082.04082.5	20	693		3485.65	698.138	5	-4.5	0.35	0.58	29.11
GPEPGPQPTXEGDVLDTLEALGYKGPLLEEQALTK-YKDLVPDNSK-a24-b2	pr|PROT03|FAM98B	pr|PROT04|CGI-99	inter-protein xl	mfaini_C1912_053.c.10800.10800.4_mfaini_C1912_053.c.10775.10775.4	26	100		5024.51	1257.13	4	-1	0.38	0.55	28.98
DVNCPFKIQDR-ZSNAAGDVGGR-a7-b1	pr|PROT04|CGI-99	pr|PROT05|Ashwin	inter-protein xl	mfaini_C1912_056.c.04011.04011.3_mfaini_C1912_056.c.03951.03951.3	72	-2		2431.16	811.393	3	0.3	0.4	0.41	28.54
VASPKLVMEEAPESYK-KQNLER-a5-b1	pr|PROT01|HSPC117	pr|PROT02|DDX1	inter-protein xl	mfaini_C1912_056.c.03918.03918.3_mfaini_C1912_056.c.03876.03876.3	465	555		2701.4	901.474	3	-0.8	0.45	0.18	28.36
QATKDAGRIAGLEVK-EQHEIKNETKR-a4-b6	sp|P0A6Y8|DNAK_ECOLI	pr|PROT05|Ashwin	inter-protein xl	mfaini_C1912_056.c.00900.00900.4_mfaini_C1912_056.c.00894.00894.4	155	84		3104.64	777.168	4	-6	0.28	0.89	28.3		cross-link with contaminant
LTALDYHNPAGFNCKDETEFR-LGKSHIR-a15-b3	pr|PROT04|CGI-99	pr|PROT02|DDX1	inter-protein xl	mfaini_C1912_054.c.03651.03651.4_mfaini_C1912_054.c.03644.03644.4	20	461		3444.68	862.178	4	-2.6	0.45	0.37	27.82
VASPKLVMEEAPESYK-ZSNAAGDVGGR-a5-b1	pr|PROT01|HSPC117	pr|PROT05|Ashwin	inter-protein xl	mfaini_C1912_054.c.04778.04778.3_mfaini_C1912_054.c.04757.04757.3	465	-2		2817.38	940.136	3	-0.7	0.47	0.3	27.8
YKDLVPDNSK-HKNSQLDK-a2-b2	pr|PROT04|CGI-99	pr|PROT03|FAM98B	inter-protein xl	mfaini_C1912_054.c.01035.01035.3_mfaini_C1912_054.c.00988.00988.3	100	136		2284.17	762.397	3	-0.8	0.26	0.72	27.55
LKPPPQASFTSNAFR-HYKIEDR-a2-b3	pr|PROT05|Ashwin	pr|PROT04|CGI-99	inter-protein xl	mfaini_C1912_055.c.03394.03394.4_mfaini_C1912_055.c.03363.03363.4	127	41		2757.43	690.365	4	1	0.33	0.38	27.49
ZSNAAGDVGGR-VTYGQKR-a1-b6	pr|PROT05|Ashwin	pr|PROT02|DDX1	inter-protein xl	mfaini_C1912_053.c.01245.01245.3_mfaini_C1912_053.c.01187.01187.3	-2	693		1890.95	631.326	3	-0.8	0.39	0.38	26.97
TDDVHAKDNTRPGANSPEMWSEAIK-MLQADPNKVSAR-a7-b8	pr|PROT02|DDX1	pr|PROT01|HSPC117	inter-protein xl	mfaini_C1912_056.c.03892.03892.5_mfaini_C1912_056.c.03860.03860.5	472	206		4235.03	848.015	5	-0.6	0.56	0.48	26.78
VPVDEFDGKVTYGQK-MLQADPNKVSAR-a9-b8	pr|PROT02|DDX1	pr|PROT01|HSPC117	inter-protein xl	mfaini_C1912_055.c.04559.04559.4_mfaini_C1912_055.c.04527.04527.4	687	206		3147.59	787.905	4	-0.9	0.37	0.41	26.59
LDDLVSTGKLNLSQVR-ZSNAAGDVGGR-a9-b1	pr|PROT02|DDX1	pr|PROT05|Ashwin	inter-protein xl	mfaini_C1912_055.c.06179.06179.3_mfaini_C1912_055.c.06122.06122.3	358	-2		2797.45	933.492	3	-1.3	0.31	0.38	26.59
VASPKLVMEEAPESYK-YIDNPKLR-a5-b6	pr|PROT01|HSPC117	pr|PROT02|DDX1	inter-protein xl	mfaini_C1912_055.c.05202.05202.4_mfaini_C1912_055.c.05181.05181.4	465	317		2932.53	734.141	4	2.5	0.24	0.49	25.34
TDDVHAKDNTRPGANSPEMWSEAIK-KRPLIVFDGSSTSTSIK-a7-b1	pr|PROT02|DDX1	pr|PROT05|Ashwin	inter-protein xl	mfaini_C1912_055.c.04879.04879.5_mfaini_C1912_055.c.04862.04862.5	472	98		4741.35	949.278	5	-3.6	0.35	0.66	25.19
GVIPMNAKDLEEALEMGVDWSLR-ZSNAAGDVGGR-a8-b1	pr|PROT01|HSPC117	pr|PROT05|Ashwin	inter-protein xl	mfaini_C1912_053.c.12196.12196.3_mfaini_C1912_053.c.12201.12201.3	166	-2		3612.74	1205.26	3	-3.2	0.36	0.34	25.18
INEAIVAVQAIIADPKTDHR-LKPPPQASFTSNAFR-a16-b2	pr|PROT04|CGI-99	pr|PROT05|Ashwin	inter-protein xl	mfaini_C1912_053.c.07974.07974.4_mfaini_C1912_053.c.07942.07942.4	234	127		3971.12	993.787	4	-2.1	0.44	0.44	24.98
AAGGGSYKGHVDILAPTVQELAALEK-IASPEGQDYLKGMAAAGNYAWVNR-a8-b11	pr|PROT02|DDX1	pr|PROT01|HSPC117	inter-protein xl	mfaini_C1912_053.c.09442.09442.5_mfaini_C1912_053.c.09437.09437.5	702	308		5313.69	1063.75	5	2.3	0.33	0.62	24.89
VASPKLVMEEAPESYK-LKPPPQASFTSNAFR-a5-b2	pr|PROT01|HSPC117	pr|PROT05|Ashwin	inter-protein xl	mfaini_C1912_055.c.06039.06039.4_mfaini_C1912_055.c.06023.06023.4	465	127		3574.83	894.714	4	-3.3	0.42	0.54	24.1
NIHSSDWPKFFEK-EQHEIKNETK-a9-b6	pr|PROT04|CGI-99	pr|PROT05|Ashwin	inter-protein xl	mfaini_C1912_056.c.03089.03089.4_mfaini_C1912_056.c.03135.03135.4	58	84		3026.47	757.627	4	-0.8	0.16	0.56	23.89
KFEELVQTR-FFEKYLR-a1-b4	sp|P0A6Y8|DNAK_ECOLI	pr|PROT04|CGI-99	inter-protein xl	mfaini_C1912_055.c.06333.06333.4_mfaini_C1912_055.c.06303.06303.4	528	62		2288.22	573.062	4	-1.7	0.14	0.69	23.47		cross-link with contaminant
NSQLDKNSEVYQEVQAMFDTLGIPK-DLVPDNSKTADNATK-a6-b8	pr|PROT03|FAM98B	pr|PROT04|CGI-99	inter-protein xl	mfaini_C1912_053.c.11469.11469.4_mfaini_C1912_053.c.11501.11501.4	142	108		4579.23	1145.82	4	0.6	0.36	0.4	22.8
EQHEIKNETKR-FFEKYLR-a10-b4	pr|PROT05|Ashwin	pr|PROT04|CGI-99	inter-protein xl	mfaini_C1912_054.c.01973.01973.3_mfaini_C1912_054.c.01944.01944.3	88	62		2550.32	851.115	3	-0.4	0.35	0.51	22.43
EQLAQAMFDHIPVGVGSKGVIPMNAK-INEAIVAVQAIIADPKTDHR-a18-b16	pr|PROT01|HSPC117	pr|PROT04|CGI-99	inter-protein xl	mfaini_C1912_056.c.09313.09313.5_mfaini_C1912_056.c.09246.09246.5	158	234		5047.66	1010.54	5	-1.3	0.22	0.72	22.35
TDDVHAKDNTRPGANSPEMWSEAIK-KIQHVTWP-a7-b1	pr|PROT02|DDX1	pr|PROT05|Ashwin	inter-protein xl	mfaini_C1912_054.c.04565.04565.5_mfaini_C1912_054.c.04600.04600.5	472	225		3913.91	783.789	5	-0.3	0.49	0.61	22.31
GLPQLGTLGAGNHYAEIQVVDEIFNEYAAKK-ANQTKEGLPVALDK-a30-b5	pr|PROT01|HSPC117	pr|PROT04|CGI-99	inter-protein xl	mfaini_C1912_056.c.10029.10029.4_mfaini_C1912_056.c.09997.09997.4	244	176		4965.59	1242.4	4	2.5	0.21	0.33	21.79
TDDVHAKDNTRPGANSPEXWSEAIK-ZSNAAGDVGGR-a7-b1	pr|PROT02|DDX1	pr|PROT05|Ashwin	inter-protein xl	mfaini_C1912_054.c.03020.03020.4_mfaini_C1912_054.c.02987.02987.4	472	-2		3824.76	957.199	4	-0.4	0.27	0.19	21.18
INKNCWRIK-LKEAAEKAK-a3-b2	pr|PROT01|HSPC117	sp|P0A6Y8|DNAK_ECOLI	inter-protein xl	mfaini_C1912_054.c.04302.04302.4_mfaini_C1912_054.c.04312.04312.4	17	263		2355.31	589.835	4	-0.6	0.12	0.68	20.78		cross-link with contaminant
VEQHVVDGKER-KIQHVTWP-a9-b1	pr|PROT01|HSPC117	pr|PROT05|Ashwin	inter-protein xl	mfaini_C1912_053.c.02483.02483.3_mfaini_C1912_053.c.02467.02467.3	366	225		2440.28	814.436	3	-0.5	0.3	0.65	20.59
NSQLDKNSEVYQEVQAMFDTLGIPK-YKDLVPDNSK-a6-b2	pr|PROT03|FAM98B	pr|PROT04|CGI-99	inter-protein xl	mfaini_C1912_054.c.11021.11021.4_mfaini_C1912_054.c.11065.11065.4	142	100		4169.06	1043.27	4	2.6	0.32	0.79	20.48
TDDVHAKDNTRPGANSPEMWSEAIK-LKPPPQASFTSNAFR-a7-b2	pr|PROT02|DDX1	pr|PROT05|Ashwin	inter-protein xl	mfaini_C1912_053.c.05079.05079.4_mfaini_C1912_053.c.05050.05050.4	472	127		4566.22	1142.56	4	-1.8	0.35	0.56	20.4
LKPPPQASFTSNAFR-LGKSHIR-a2-b3	pr|PROT05|Ashwin	pr|PROT02|DDX1	inter-protein xl	mfaini_C1912_055.c.02880.02880.3_mfaini_C1912_055.c.02837.02837.3	127	461		2607.42	870.149	3	-2.4	0.4	0.87	20.06
HDDYLVMLKAIR-LGKVGR-a9-b3	pr|PROT04|CGI-99	pr|PROT04|CGI-99	intra-protein xl	mfaini_C1912_054.c.05652.05652.4_mfaini_C1912_054.c.05619.05619.4	154	241	87	2239.25	560.821	4	-0.1	0.67	0.79	50
KRPLIVFDGSSTSTSIK-KTENGDNDR-a1-b1	pr|PROT05|Ashwin	pr|PROT05|Ashwin	intra-protein xl	mfaini_C1912_053.c.02605.02605.4_mfaini_C1912_053.c.02569.02569.4	98	117	19	3020.54	756.142	4	-1.1	0.42	0.29	48.55
AKLESLVEDLVNR-KDQGIDLR-a2-b1	sp|P0A6Y8|DNAK_ECOLI	sp|P0A6Y8|DNAK_ECOLI	intra-protein xl	mfaini_C1912_056.c.08346.08346.3_mfaini_C1912_056.c.08341.08341.3	304	246	58	2566.39	856.473	3	-0.8	0.4	0.23	44.67		contaminant
IASPEGQDYLKGMAAAGNYAWVNR-DKIIVNDR-a11-b2	pr|PROT01|HSPC117	pr|PROT01|HSPC117	intra-protein xl	mfaini_C1912_055.c.07683.07683.4_mfaini_C1912_055.c.07653.07653.4	308	285	23	3690.84	923.719	4	-0.5	0.41	0.43	44.42
TKIDCDNLEQYFIQQGGGPDKK-GKGCYNTR-a2-b2	pr|PROT02|DDX1	pr|PROT02|DDX1	intra-protein xl	mfaini_C1912_054.c.04826.04826.5_mfaini_C1912_054.c.04849.04849.5	516	636	120	3645.72	730.151	5	-1	0.4	0.14	43.54
TKIDCDNLEQYFIQQGGGPDK-GKGCYNTR-a2-b2	pr|PROT02|DDX1	pr|PROT02|DDX1	intra-protein xl	mfaini_C1912_053.c.05902.05902.4_mfaini_C1912_053.c.05891.05891.4	516	636	120	3517.62	880.413	4	-0.5	0.44	0.24	43.47
SQHSGNAQVTQTKFLPNAPK-TTIKTGASVLNK-a13-b4	pr|PROT02|DDX1	pr|PROT02|DDX1	intra-protein xl	mfaini_C1912_054.c.03110.03110.4_mfaini_C1912_054.c.03074.03074.4	281	82	199	3521.88	881.478	4	-1.4	0.39	0.28	43.46
LTQDAVAKANQTK-LGKVGR-a8-b3	pr|PROT04|CGI-99	pr|PROT04|CGI-99	intra-protein xl	mfaini_C1912_053.c.01537.01537.4_mfaini_C1912_053.c.01510.01510.4	171	241	70	2153.21	539.311	4	-1.7	0.59	0.73	43.28
INEAIVAVQAIIADPKTDHR-LGKVGR-a16-b3	pr|PROT04|CGI-99	pr|PROT04|CGI-99	intra-protein xl	mfaini_C1912_053.c.06573.06573.5_mfaini_C1912_053.c.06541.06541.5	234	241	7	2939.66	588.939	5	0.1	0.69	0.52	42.93
KGHQFSCVCLHGDRKPHER-GKGCYNTR-a15-b2	pr|PROT02|DDX1	pr|PROT02|DDX1	intra-protein xl	mfaini_C1912_056.c.00460.00460.5_mfaini_C1912_056.c.00459.00459.5	550	636	86	3439.61	688.93	5	-2	0.39	0.38	42.82
GKHYYEVSCHDQGLCR-GHVKFSK-a2-b4	pr|PROT02|DDX1	pr|PROT02|DDX1	intra-protein xl	mfaini_C1912_054.c.01089.01089.4_mfaini_C1912_054.c.01042.01042.4	132	204	72	2947.38	737.854	4	-0.5	0.33	0.73	42.7
VASPKLVMEEAPESYK-LRPIAVIKG-a5-b8	pr|PROT01|HSPC117	pr|PROT01|HSPC117	intra-protein xl	mfaini_C1912_053.c.06156.06156.4_mfaini_C1912_053.c.06157.06157.4	465	504	39	2880.6	721.158	4	-0.8	0.53	0.27	41.93
TDDVHAKDNTRPGANSPEMWSEAIK-LGKSHIR-a7-b3	pr|PROT02|DDX1	pr|PROT02|DDX1	intra-protein xl	mfaini_C1912_054.c.02496.02496.5_mfaini_C1912_054.c.02638.02638.5	472	461	11	3715.84	744.176	5	0.3	0.5	0.87	41.84
VNKDSLTDLYVQHAIPLPQR-ZSNAAGDVGGR-a3-b1	pr|PROT05|Ashwin	pr|PROT05|Ashwin	intra-protein xl	mfaini_C1912_054.c.06223.06223.4_mfaini_C1912_054.c.06183.06183.4	46	-2	48	3346.73	837.69	4	0.1	0.46	0.63	41.76
HYKIEDR-LGKVGR-a3-b3	pr|PROT04|CGI-99	pr|PROT04|CGI-99	intra-protein xl	mfaini_C1912_055.c.00819.00819.4_mfaini_C1912_055.c.00808.00808.4	41	241	200	1725.95	432.496	4	-0.1	0.71	0.72	41.73
APDGYIVKSQHSGNAQVTQTK-TTIKTGASVLNK-a8-b4	pr|PROT02|DDX1	pr|PROT02|DDX1	intra-protein xl	mfaini_C1912_055.c.02534.02534.4_mfaini_C1912_055.c.02513.02513.4	268	82	186	3597.89	900.481	4	-2.2	0.47	0.57	40.95
NVTDVVNTCHDAGISKK-INKNCWR-a16-b3	pr|PROT01|HSPC117	pr|PROT01|HSPC117	intra-protein xl	mfaini_C1912_055.c.03140.03140.3_mfaini_C1912_055.c.03119.03119.3	492	17	475	2984.46	995.828	3	0.7	0.48	0.38	40.9
NQALFPACVLKNAELK-EVKEWHGCR-a11-b3	pr|PROT02|DDX1	pr|PROT02|DDX1	intra-protein xl	mfaini_C1912_055.c.05394.05394.5_mfaini_C1912_055.c.05693.05693.5	234	117	117	3152.59	631.525	5	-1.1	0.67	0.65	40.62
NHVGKPLLKMDLNSEQAEQLER-EDLSKIIR-a9-b5	pr|PROT03|FAM98B	pr|PROT03|FAM98B	intra-protein xl	mfaini_C1912_054.c.04970.04970.4_mfaini_C1912_054.c.04943.04943.4	196	280	84	3658.93	915.741	4	-0.4	0.36	0.31	40.37
FLPNAPKALIVEPSR-DQQEGKK-a7-b6	pr|PROT02|DDX1	pr|PROT02|DDX1	intra-protein xl	mfaini_C1912_055.c.04287.04287.4_mfaini_C1912_055.c.04295.04295.4	288	75	213	2620.42	656.113	4	-1.3	0.47	0.84	40.13
FFEKYLR-HYKIEDR-a4-b3	pr|PROT04|CGI-99	pr|PROT04|CGI-99	intra-protein xl	mfaini_C1912_053.c.03809.03809.4_mfaini_C1912_053.c.03784.03784.4	62	41	21	2099.08	525.777	4	-3.3	0.65	0.47	40.13
TTIKTGASVLNK-DQQEGKK-a4-b6	pr|PROT02|DDX1	pr|PROT02|DDX1	intra-protein xl	mfaini_C1912_053.c.01536.01536.3_mfaini_C1912_053.c.01503.01503.3	82	75	7	2201.19	734.737	3	-1.5	0.47	0.71	39.88
HDDYLVXLKAIR-LGKVGR-a9-b3	pr|PROT04|CGI-99	pr|PROT04|CGI-99	intra-protein xl	mfaini_C1912_053.c.04774.04774.4_mfaini_C1912_053.c.04696.04696.4	154	241	87	2255.24	564.818	4	-2.4	0.45	0.72	39.85
NLDFQDVLDKLADXGIAIR-LRPIAVIKG-a10-b8	pr|PROT01|HSPC117	pr|PROT01|HSPC117	intra-protein xl	mfaini_C1912_054.c.10727.10727.4_mfaini_C1912_054.c.10715.10715.4	451	504	53	3265.8	817.459	4	-1.9	0.38	0.77	39.36
ELAEQTLNNIKQFK-YIDNPKLR-a11-b6	pr|PROT02|DDX1	pr|PROT02|DDX1	intra-protein xl	mfaini_C1912_054.c.06082.06082.4_mfaini_C1912_054.c.06041.06041.4	307	317	10	2830.53	708.639	4	0.8	0.43	0.5	39.29
TGASVLNKWQMNPYDR-DQQEGKK-a8-b6	pr|PROT02|DDX1	pr|PROT02|DDX1	intra-protein xl	mfaini_C1912_054.c.04674.04674.4_mfaini_C1912_054.c.04645.04645.4	90	75	15	2848.38	713.103	4	-0.7	0.36	0.4	39.27
APDGYIVKSQHSGNAQVTQTK-ATKGLMK-a8-b3	pr|PROT02|DDX1	pr|PROT02|DDX1	intra-protein xl	mfaini_C1912_053.c.01921.01921.3_mfaini_C1912_053.c.01894.01894.3	268	126	142	3113.62	1038.88	3	-0.7	0.37	0.39	38.85
APDGYIVKSQHSGNAQVTQTK-DQQEGKK-a8-b6	pr|PROT02|DDX1	pr|PROT02|DDX1	intra-protein xl	mfaini_C1912_053.c.01117.01117.4_mfaini_C1912_053.c.01099.01099.4	268	75	193	3197.59	800.406	4	-1.3	0.38	0.84	38.65
TDDVHAKDNTRPGANSPEMWSEAIK-EVKEWHGCR-a7-b3	pr|PROT02|DDX1	pr|PROT02|DDX1	intra-protein xl	mfaini_C1912_054.c.03176.03176.5_mfaini_C1912_054.c.03202.03202.5	472	117	355	4105.91	822.189	5	1.1	0.26	0.24	38.5
GLGHQVATDALVAMEKAMKR-RDKIIVNDR-a16-b3	pr|PROT01|HSPC117	pr|PROT01|HSPC117	intra-protein xl	mfaini_C1912_056.c.08575.08575.5_mfaini_C1912_056.c.08553.08553.5	279	285	6	3390.8	679.169	5	-5.5	0.58	0.47	38.49
APDGYIVKSQHSGNAQVTQTK-ATKGLXK-a8-b3	pr|PROT02|DDX1	pr|PROT02|DDX1	intra-protein xl	mfaini_C1912_053.c.01565.01565.4_mfaini_C1912_053.c.01548.01548.4	268	126	142	3129.61	783.41	4	-1.5	0.41	0.25	38.23
VQKNHVGKPLLK-VKDILSK-a3-b2	pr|PROT03|FAM98B	pr|PROT03|FAM98B	intra-protein xl	mfaini_C1912_054.c.01504.01504.4_mfaini_C1912_054.c.01341.01341.4	187	179	8	2299.4	575.857	4	-1.1	0.26	0.79	38.16
KRPLIVFDGSSTSTSIK-ZSNAAGDVGGR-a1-b1	pr|PROT05|Ashwin	pr|PROT05|Ashwin	intra-protein xl	mfaini_C1912_053.c.04046.04046.4_mfaini_C1912_053.c.04010.04010.4	98	-2	100	2875.5	719.883	4	-0.7	0.41	0.22	38.16
MHNQIPQVTSDGKR-EVKEWHGCR-a13-b3	pr|PROT02|DDX1	pr|PROT02|DDX1	intra-protein xl	mfaini_C1912_056.c.01785.01785.4_mfaini_C1912_056.c.01773.01773.4	399	117	282	2947.42	737.862	4	-0.4	0.37	0.32	38.09
FFEKYLR-LGKVGR-a4-b3	pr|PROT04|CGI-99	pr|PROT04|CGI-99	intra-protein xl	mfaini_C1912_056.c.04201.04201.3_mfaini_C1912_056.c.04169.04169.3	62	241	179	1768	590.341	3	-1.5	0.61	0.75	37.99
ALIVEPSRELAEQTLNNIKQFK-YIDNPKLR-a19-b6	pr|PROT02|DDX1	pr|PROT02|DDX1	intra-protein xl	mfaini_C1912_055.c.08024.08024.5_mfaini_C1912_055.c.07987.07987.5	307	317	10	3696.02	740.211	5	-2.2	0.42	0.48	37.89
SQHSGNAQVTQTKFLPNAPK-GKTTIK-a13-b2	pr|PROT02|DDX1	pr|PROT02|DDX1	intra-protein xl	mfaini_C1912_054.c.01825.01825.5_mfaini_C1912_054.c.01805.01805.5	281	78	203	2936.57	588.322	5	0.4	0.43	0.28	37.85
EHKMDQAIIFCR-ILKGEYAVR-a3-b3	pr|PROT02|DDX1	pr|PROT02|DDX1	intra-protein xl	mfaini_C1912_055.c.04465.04465.4_mfaini_C1912_055.c.04421.04421.4	505	493	12	2732.41	684.112	4	0.4	0.35	0.38	37.82
EVKEWHGCR-KQNLER-a3-b1	pr|PROT02|DDX1	pr|PROT02|DDX1	intra-protein xl	mfaini_C1912_054.c.00747.00747.4_mfaini_C1912_054.c.00725.00725.4	117	555	438	2124.05	532.021	4	-0.7	0.22	0.74	37.74
MHNQIPQVTSDGKR-DQQEGKK-a13-b6	pr|PROT02|DDX1	pr|PROT02|DDX1	intra-protein xl	mfaini_C1912_056.c.00844.00844.4_mfaini_C1912_056.c.00821.00821.4	399	75	324	2579.27	645.826	4	-2	0.56	0.41	37.73
SQHSGNAQVTQTKFLPNAPK-DQQEGKK-a13-b6	pr|PROT02|DDX1	pr|PROT02|DDX1	intra-protein xl	mfaini_C1912_053.c.01689.01689.5_mfaini_C1912_053.c.01667.01667.5	281	75	206	3121.57	625.322	5	-3.3	0.4	0.44	37.71
IASPEGQDYLKGMAAAGNYAWVNR-MLQADPNKVSAR-a11-b8	pr|PROT01|HSPC117	pr|PROT01|HSPC117	intra-protein xl	mfaini_C1912_055.c.07166.07166.4_mfaini_C1912_055.c.07144.07144.4	308	206	102	4047.99	1013.01	4	0.2	0.49	0.42	37.43
SQHSGNAQVTQTKFLPNAPK-MHNQIPQVTSDGKR-a13-b13	pr|PROT02|DDX1	pr|PROT02|DDX1	intra-protein xl	mfaini_C1912_055.c.02549.02549.5_mfaini_C1912_055.c.02525.02525.5	281	399	118	3899.96	781	5	-1.8	0.41	0.48	37.4
GHQFSCVCLHGDRKPHER-GKGCYNTR-a14-b2	pr|PROT02|DDX1	pr|PROT02|DDX1	intra-protein xl	mfaini_C1912_056.c.00578.00578.5_mfaini_C1912_056.c.00569.00569.5	550	636	86	3311.53	663.315	5	2.6	0.34	0.25	37.23
LDDLVSTGKLNLSQVR-MHNQIPQVTSDGKR-a9-b13	pr|PROT02|DDX1	pr|PROT02|DDX1	intra-protein xl	mfaini_C1912_056.c.05039.05039.5_mfaini_C1912_056.c.05004.05004.5	358	399	41	3504.83	701.974	5	-1.2	0.42	0.44	37.19
APDGYIVKSQHSGNAQVTQTK-KQNLER-a8-b1	pr|PROT02|DDX1	pr|PROT02|DDX1	intra-protein xl	mfaini_C1912_055.c.01516.01516.4_mfaini_C1912_055.c.01496.01496.4	268	555	287	3152.62	789.162	4	-0.9	0.44	0.85	36.82
NLDFQDVLDKLADMGIAIR-VASPKLVMEEAPESYK-a10-b5	pr|PROT01|HSPC117	pr|PROT01|HSPC117	intra-protein xl	mfaini_C1912_054.c.12164.12164.4_mfaini_C1912_054.c.12152.12152.4	451	465	14	4061.07	1016.28	4	-0.6	0.43	0.34	36.63
EKTACAINK-IYQPKR-a2-b5	pr|PROT03|FAM98B	pr|PROT03|FAM98B	intra-protein xl	mfaini_C1912_054.c.00719.00719.4_mfaini_C1912_054.c.00688.00688.4	292	256	36	1975.06	494.771	4	-0.7	0.29	0.82	36.4
TDDVHAKDNTRPGANSPEMWSEAIK-ILKGEYAVR-a7-b3	pr|PROT02|DDX1	pr|PROT02|DDX1	intra-protein xl	mfaini_C1912_056.c.04145.04145.5_mfaini_C1912_056.c.04121.04121.5	472	493	21	3953.95	791.798	5	-1.5	0.5	0.31	36.27
VASPKLVXEEAPESYK-LRPIAVIKG-a5-b8	pr|PROT01|HSPC117	pr|PROT01|HSPC117	intra-protein xl	mfaini_C1912_053.c.04728.04728.4_mfaini_C1912_053.c.04701.04701.4	465	504	39	2896.6	725.158	4	1.4	0.44	0.16	36.24
ELAEQTLNNIKQFK-KYIDNPK-a11-b1	pr|PROT02|DDX1	pr|PROT02|DDX1	intra-protein xl	mfaini_C1912_053.c.05629.05629.4_mfaini_C1912_053.c.05597.05597.4	307	311	4	2689.43	673.366	4	-0.3	0.46	0.49	36.24
APDGYIVKSQHSGNAQVTQTK-GKTTIK-a8-b2	pr|PROT02|DDX1	pr|PROT02|DDX1	intra-protein xl	mfaini_C1912_054.c.01373.01373.4_mfaini_C1912_054.c.01342.01342.4	268	78	190	3012.59	754.155	4	0.2	0.47	0.37	36.19
YALSPKTTITMAHLLAAR-IYQPKR-a6-b5	pr|PROT03|FAM98B	pr|PROT03|FAM98B	intra-protein xl	mfaini_C1912_053.c.05938.05938.5_mfaini_C1912_053.c.05933.05933.5	263	256	7	2898.61	580.73	5	-2.1	0.5	0.85	36.05
KRPLIVFDGSSTSTSIKVK-KTENGDNDR-a17-b1	pr|PROT05|Ashwin	pr|PROT05|Ashwin	intra-protein xl	mfaini_C1912_053.c.02008.02008.5_mfaini_C1912_053.c.01981.01981.5	114	117	3	3247.7	650.547	5	-2.6	0.36	0.57	36.01
LDDLVSTGKLNLSQVR-KQNLER-a9-b1	pr|PROT02|DDX1	pr|PROT02|DDX1	intra-protein xl	mfaini_C1912_053.c.05075.05075.4_mfaini_C1912_053.c.05058.05058.4	358	555	197	2681.47	671.374	4	-1.7	0.48	0.85	35.82
ELAEQTLNNIKQFK-KYIDNPKLR-a11-b7	pr|PROT02|DDX1	pr|PROT02|DDX1	intra-protein xl	mfaini_C1912_054.c.05205.05205.4_mfaini_C1912_054.c.05189.05189.4	307	317	10	2958.62	740.662	4	-0.7	0.56	0.83	35.62
KLSNSSSSVSPLILSSNLPVNNK-ZSNAAGDVGGR-a1-b1	pr|PROT05|Ashwin	pr|PROT05|Ashwin	intra-protein xl	mfaini_C1912_054.c.05393.05393.3_mfaini_C1912_054.c.05390.05390.3	141	-2	143	3424.76	1142.6	3	-4.4	0.33	0.32	35.59
TDDVHAKDNTRPGANSPEXWSEAIK-LGKSHIR-a7-b3	pr|PROT02|DDX1	pr|PROT02|DDX1	intra-protein xl	mfaini_C1912_054.c.02175.02175.5_mfaini_C1912_054.c.02131.02131.5	472	461	11	3731.83	747.374	5	-0.3	0.45	0.89	35.49
LTQDAVAKANQTK-HDDYLVMLKAIR-a8-b9	pr|PROT04|CGI-99	pr|PROT04|CGI-99	intra-protein xl	mfaini_C1912_056.c.05601.05601.4_mfaini_C1912_056.c.05586.05586.4	171	154	17	2997.59	750.405	4	-1.8	0.52	0.75	35.42
NHVGKPLLK-EDLSKIIR-a5-b5	pr|PROT03|FAM98B	pr|PROT03|FAM98B	intra-protein xl	mfaini_C1912_055.c.03447.03447.3_mfaini_C1912_055.c.03305.03305.3	192	280	88	2115.24	706.087	3	-1.8	0.36	0.82	35.19
TDDVHAKDNTRPGANSPEXWSEAIK-GKGCYNTR-a7-b2	pr|PROT02|DDX1	pr|PROT02|DDX1	intra-protein xl	mfaini_C1912_056.c.02514.02514.5_mfaini_C1912_056.c.02442.02442.5	472	636	164	3876.77	776.362	5	-2.2	0.32	0.22	34.97
DVNCPFKIQDR-HYKIEDR-a7-b3	pr|PROT04|CGI-99	pr|PROT04|CGI-99	intra-protein xl	mfaini_C1912_056.c.03068.03068.4_mfaini_C1912_056.c.03035.03035.4	72	41	31	2488.21	623.061	4	-1.2	0.58	0.41	34.93
NFIVWLEDQKIR-DVNCPFKIQDR-a10-b7	pr|PROT04|CGI-99	pr|PROT04|CGI-99	intra-protein xl	mfaini_C1912_054.c.09321.09321.4_mfaini_C1912_054.c.09289.09289.4	36	72	36	3088.59	773.154	4	1.5	0.53	0.68	34.83
AKLESLVEDLVNR-HMNIKVTR-a2-b5	sp|P0A6Y8|DNAK_ECOLI	sp|P0A6Y8|DNAK_ECOLI	intra-protein xl	mfaini_C1912_056.c.06778.06778.3_mfaini_C1912_056.c.06752.06752.3	304	299	5	2620.44	874.486	3	-0.6	0.29	0.19	34.66		contaminant
MHNQIPQVTSDGKR-KQNLER-a13-b1	pr|PROT02|DDX1	pr|PROT02|DDX1	intra-protein xl	mfaini_C1912_056.c.01425.01425.4_mfaini_C1912_056.c.01359.01359.4	399	555	156	2534.3	634.583	4	-0.4	0.53	0.84	34.5
MHNQIPQVTSDGKR-KYIDNPK-a13-b1	pr|PROT02|DDX1	pr|PROT02|DDX1	intra-protein xl	mfaini_C1912_056.c.01816.01816.4_mfaini_C1912_056.c.01797.01797.4	399	311	88	2624.33	657.091	4	-2	0.39	0.4	34.3
VKTDDIAR-IYQPKR-a2-b5	pr|PROT03|FAM98B	pr|PROT03|FAM98B	intra-protein xl	mfaini_C1912_054.c.01102.01102.4_mfaini_C1912_054.c.01077.01077.4	245	256	11	1858.03	465.515	4	-0.8	0.44	0.37	34.29
NQALFPACVLKNAELK-FGFGFGGTGKK-a11-b10	pr|PROT02|DDX1	pr|PROT02|DDX1	intra-protein xl	mfaini_C1912_055.c.07972.07972.4_mfaini_C1912_055.c.07809.07809.4	234	172	62	3054.59	764.655	4	-3.9	0.61	0.82	34.21
TADNATKNAEPLINLDVNNPDFK-YKDLVPDNSK-a7-b2	pr|PROT04|CGI-99	pr|PROT04|CGI-99	intra-protein xl	mfaini_C1912_054.c.06466.06466.4_mfaini_C1912_054.c.06444.06444.4	115	100	15	3828.91	958.235	4	0.3	0.46	0.86	34.21
VQKNHVGKPLLK-EDLSKIIR-a3-b5	pr|PROT03|FAM98B	pr|PROT03|FAM98B	intra-protein xl	mfaini_C1912_056.c.02220.02220.4_mfaini_C1912_056.c.02350.02350.4	187	280	93	2470.47	618.624	4	0.8	0.3	0.87	33.75
RPLIVFDGSSTSTSIKVK-KTENGDNDR-a16-b1	pr|PROT05|Ashwin	pr|PROT05|Ashwin	intra-protein xl	mfaini_C1912_053.c.02935.02935.3_mfaini_C1912_053.c.02904.02904.3	114	117	3	3119.61	1040.88	3	-0.2	0.3	0.43	33.69
NLDFQDVLDKLADXGIAIR-VASPKLVMEEAPESYK-a10-b5	pr|PROT01|HSPC117	pr|PROT01|HSPC117	intra-protein xl	mfaini_C1912_053.c.11118.11118.4_mfaini_C1912_053.c.11116.11116.4	451	465	14	4077.06	1020.27	4	-1.3	0.38	0.62	33.39
DGFVALSKAPDGYIVK-TGASVLNKWQMNPYDR-a8-b8	pr|PROT02|DDX1	pr|PROT02|DDX1	intra-protein xl	mfaini_C1912_053.c.08631.08631.4_mfaini_C1912_053.c.08608.08608.4	260	90	170	3695.85	924.971	4	-3.3	0.44	0.72	33.35
ELAEQTLNNIKQFKK-YIDNPKLR-a11-b6	pr|PROT02|DDX1	pr|PROT02|DDX1	intra-protein xl	mfaini_C1912_053.c.05174.05174.3_mfaini_C1912_053.c.05147.05147.3	307	317	10	2958.61	987.209	3	-4.4	0.36	0.38	33.26
LGKSHIR-AIKEHK-a3-b3	pr|PROT02|DDX1	pr|PROT02|DDX1	intra-protein xl	mfaini_C1912_055.c.00405.00405.4_mfaini_C1912_055.c.00407.00407.4	461	502	41	1671.98	419.002	4	-1.2	0.37	0.9	33.1
EGYAWAEDKEHCEEYGR-MLQADPNKVSAR-a9-b8	pr|PROT01|HSPC117	pr|PROT01|HSPC117	intra-protein xl	mfaini_C1912_056.c.04134.04134.5_mfaini_C1912_056.c.04132.04132.5	190	206	16	3594.62	719.933	5	2.8	0.24	0.61	33.05
GEDSVPDTVHHVVVPVNPKTDR-MGLAISLVATEKEK-a19-b12	pr|PROT02|DDX1	pr|PROT02|DDX1	intra-protein xl	mfaini_C1912_055.c.05549.05549.5_mfaini_C1912_055.c.05531.05531.5	451	623	172	4023.08	805.624	5	-4	0.34	0.65	32.95
IAGLEVKR-QATKDAGR-a7-b4	sp|P0A6Y8|DNAK_ECOLI	sp|P0A6Y8|DNAK_ECOLI	intra-protein xl	mfaini_C1912_055.c.01529.01529.4_mfaini_C1912_055.c.01498.01498.4	166	155	11	1868.04	468.019	4	-2.1	0.31	0.68	32.79		contaminant
EHKMDQAIIFCR-VTYGQKR-a3-b6	pr|PROT02|DDX1	pr|PROT02|DDX1	intra-protein xl	mfaini_C1912_056.c.03086.03086.4_mfaini_C1912_056.c.03076.03076.4	505	693	188	2535.27	634.825	4	-0.9	0.5	0	32.73
KRPLIVFDGSSTSTSIK-EQHEIKNETK-a1-b6	pr|PROT05|Ashwin	pr|PROT05|Ashwin	intra-protein xl	mfaini_C1912_056.c.02626.02626.4_mfaini_C1912_056.c.02655.02655.4	98	84	14	3227.7	807.933	4	-1.1	0.31	0.47	32.68
GLGHQVATDALVAMEKAMK-RDKIIVNDR-a16-b3	pr|PROT01|HSPC117	pr|PROT01|HSPC117	intra-protein xl	mfaini_C1912_056.c.06540.06540.4_mfaini_C1912_056.c.06529.06529.4	279	285	6	3234.72	809.689	4	0.4	0.43	0.83	32.43
TTIKTGASVLNK-ATKGLMK-a4-b3	pr|PROT02|DDX1	pr|PROT02|DDX1	intra-protein xl	mfaini_C1912_054.c.02396.02396.3_mfaini_C1912_054.c.02385.02385.3	82	126	44	2117.21	706.745	3	-0.9	0.52	0.85	32.43
ILKGEYAVR-AIKEHK-a3-b3	pr|PROT02|DDX1	pr|PROT02|DDX1	intra-protein xl	mfaini_C1912_056.c.00985.00985.3_mfaini_C1912_056.c.00955.00955.3	493	502	9	1910.1	637.707	3	-0.5	0.46	0	32.34
EVKEWHGCR-GKGCYNTR-a3-b2	pr|PROT02|DDX1	pr|PROT02|DDX1	intra-protein xl	mfaini_C1912_056.c.00904.00904.3_mfaini_C1912_056.c.00891.00891.3	117	636	519	2292.06	765.027	3	1.6	0.26	0.77	32.3
EVKEWHGCR-LGKSHIR-a3-b3	pr|PROT02|DDX1	pr|PROT02|DDX1	intra-protein xl	mfaini_C1912_053.c.00688.00688.4_mfaini_C1912_053.c.00677.00677.4	117	461	344	2147.1	537.783	4	-1.8	0.26	0.78	32.25
TKIDCDNLEQYFIQQGGGPDK-GHQFSCVCLHGDRKPHERK-a2-b14	pr|PROT02|DDX1	pr|PROT02|DDX1	intra-protein xl	mfaini_C1912_053.c.03901.03901.5_mfaini_C1912_053.c.03894.03894.5	516	550	34	4910.29	983.067	5	-2.8	0.45	0.76	32.22
SHNKQFDNYGEEFTMHDTIGCYLDIDK-FGFGFGGTGKK-a4-b10	pr|PROT02|DDX1	pr|PROT02|DDX1	intra-protein xl	mfaini_C1912_053.c.07959.07959.5_mfaini_C1912_053.c.07929.07929.5	177	172	5	4516.04	904.215	5	-1.2	0.59	0.3	32.2
LDDLVSTGKLNLSQVR-TTIKTGASVLNK-a9-b4	pr|PROT02|DDX1	pr|PROT02|DDX1	intra-protein xl	mfaini_C1912_054.c.05943.05943.4_mfaini_C1912_054.c.05912.05912.4	358	82	276	3126.75	782.695	4	-0.3	0.36	0.69	32.12
DGFVALSKAPDGYIVK-LDDLVSTGKLNLSQVR-a8-b9	pr|PROT02|DDX1	pr|PROT02|DDX1	intra-protein xl	mfaini_C1912_053.c.08664.08664.4_mfaini_C1912_053.c.08643.08643.4	260	358	98	3573.93	894.49	4	-0.5	0.35	0.66	31.97
TDDVHAKDNTRPGANSPEMWSEAIK-GKGCYNTR-a7-b2	pr|PROT02|DDX1	pr|PROT02|DDX1	intra-protein xl	mfaini_C1912_056.c.02994.02994.4_mfaini_C1912_056.c.02835.02835.4	472	636	164	3860.78	966.203	4	-1.1	0.39	0.3	31.61
EGLPVALDKHILGFDTGDAVLNEAAQILR-LTQDAVAKANQTK-a9-b8	pr|PROT04|CGI-99	pr|PROT04|CGI-99	intra-protein xl	mfaini_C1912_053.c.10260.10260.4_mfaini_C1912_053.c.10304.10304.4	185	171	14	4599.44	1150.87	4	-2.1	0.3	0.56	31.56
LDDLVSTGKLNLSQVR-EVKEWHGCR-a9-b3	pr|PROT02|DDX1	pr|PROT02|DDX1	intra-protein xl	mfaini_C1912_054.c.05025.05025.4_mfaini_C1912_054.c.04986.04986.4	358	117	241	3094.59	774.654	4	-0.7	0.47	0.49	31.4
GLGHQVATDALVAMEKAMKR-RDKIIVNDR-a19-b3	pr|PROT01|HSPC117	pr|PROT01|HSPC117	intra-protein xl	mfaini_C1912_055.c.08260.08260.5_mfaini_C1912_055.c.08597.08597.5	282	285	3	3390.82	679.172	5	-1.1	0.43	0.56	31.29
FNFGEEEFKFPPKDGFVALSK-GHVKFSK-a13-b4	pr|PROT02|DDX1	pr|PROT02|DDX1	intra-protein xl	mfaini_C1912_054.c.06380.06380.5_mfaini_C1912_054.c.06341.06341.5	252	204	48	3371.72	675.351	5	-2	0.68	0.88	31.27
GLGHQVATDALVAMEKAMK-DKIIVNDR-a16-b2	pr|PROT01|HSPC117	pr|PROT01|HSPC117	intra-protein xl	mfaini_C1912_053.c.07783.07783.4_mfaini_C1912_053.c.07890.07890.4	279	285	6	3078.62	770.662	4	-1.4	0.33	0.83	31.2
LTALDYHNPAGFNCKDETEFR-LGKVGR-a15-b3	pr|PROT04|CGI-99	pr|PROT04|CGI-99	intra-protein xl	mfaini_C1912_053.c.04540.04540.4_mfaini_C1912_053.c.04510.04510.4	20	241	221	3263.6	816.908	4	-0.6	0.54	0.28	31.18
NIHSSDWPKFFEK-DVNCPFKIQDR-a9-b7	pr|PROT04|CGI-99	pr|PROT04|CGI-99	intra-protein xl	mfaini_C1912_055.c.06267.06267.5_mfaini_C1912_055.c.06249.06249.5	58	72	14	3162.53	633.514	5	1.7	0.44	0.54	31.12
MHNQIPQVTSDGKR-YIDNPKLR-a13-b6	pr|PROT02|DDX1	pr|PROT02|DDX1	intra-protein xl	mfaini_C1912_054.c.02369.02369.4_mfaini_C1912_054.c.02376.02376.4	399	317	82	2765.43	692.365	4	-0.5	0.54	0.55	30.91
MHNQIPQVTSDGKR-TTIKTGASVLNK-a13-b4	pr|PROT02|DDX1	pr|PROT02|DDX1	intra-protein xl	mfaini_C1912_056.c.02558.02558.4_mfaini_C1912_056.c.02519.02519.4	399	82	317	2979.58	745.903	4	0.2	0.34	0.61	30.75
LEYGDNAEKYK-LGKVGR-a9-b3	pr|PROT04|CGI-99	pr|PROT04|CGI-99	intra-protein xl	mfaini_C1912_053.c.02097.02097.4_mfaini_C1912_053.c.02081.02081.4	98	241	143	2095.09	524.782	4	0	0.65	0	30.33
VNKDSLTDLYVQHAIPLPQR-DLPKNR-a3-b4	pr|PROT05|Ashwin	pr|PROT05|Ashwin	intra-protein xl	mfaini_C1912_053.c.06037.06037.4_mfaini_C1912_053.c.06024.06024.4	46	67	21	3185.71	797.436	4	-2.3	0.44	0.44	29.97
NHVGKPLLK-DILSKVQK-a5-b5	pr|PROT03|FAM98B	pr|PROT03|FAM98B	intra-protein xl	mfaini_C1912_055.c.03543.03543.3_mfaini_C1912_055.c.03497.03497.3	192	184	8	2072.23	691.751	3	-2.7	0.2	0.85	29.96
APDGYIVKSQHSGNAQVTQTK-TGASVLNKWQMNPYDR-a8-b8	pr|PROT02|DDX1	pr|PROT02|DDX1	intra-protein xl	mfaini_C1912_054.c.04862.04862.4_mfaini_C1912_054.c.04819.04819.4	268	90	178	4245.09	1062.28	4	-1	0.31	0.32	29.78
DVNCPFKIQDR-FFEKYLR-a7-b4	pr|PROT04|CGI-99	pr|PROT04|CGI-99	intra-protein xl	mfaini_C1912_056.c.06410.06410.3_mfaini_C1912_056.c.06397.06397.3	72	62	10	2530.27	844.43	3	-0.6	0.44	0.56	29.72
KRPLIVFDGSSTSTSIK-LKPPPQASFTSNAFR-a1-b2	pr|PROT05|Ashwin	pr|PROT05|Ashwin	intra-protein xl	mfaini_C1912_056.c.05413.05413.5_mfaini_C1912_056.c.05416.05416.5	98	127	29	3632.95	727.599	5	-0.8	0.29	0.41	29.7
WGKMMEK-DLPKNR-a3-b4	pr|PROT05|Ashwin	pr|PROT05|Ashwin	intra-protein xl	mfaini_C1912_054.c.02373.02373.3_mfaini_C1912_054.c.02340.02340.3	72	67	5	1787.91	596.977	3	1.5	0.56	0.79	29.28
ILKGEYAVR-LGKSHIR-a3-b3	pr|PROT02|DDX1	pr|PROT02|DDX1	intra-protein xl	mfaini_C1912_055.c.01669.01669.3_mfaini_C1912_055.c.01656.01656.3	493	461	32	1995.16	666.062	3	-0.4	0.44	0.89	29.15
SQHSGNAQVTQTKFLPNAPK-LDDLVSTGKLNLSQVR-a13-b9	pr|PROT02|DDX1	pr|PROT02|DDX1	intra-protein xl	mfaini_C1912_055.c.05692.05692.4_mfaini_C1912_055.c.05652.05652.4	281	358	77	4047.14	1012.79	4	1.1	0.51	0.49	29.02
RNLDFQDVLDKLADMGIAIR-VASPKLVMEEAPESYK-a11-b5	pr|PROT01|HSPC117	pr|PROT01|HSPC117	intra-protein xl	mfaini_C1912_055.c.11456.11456.4_mfaini_C1912_055.c.11437.11437.4	451	465	14	4217.16	1055.3	4	-3.9	0.27	0.58	28.98
LKPPPQASFTSNAFR-EQHEIKNETK-a2-b6	pr|PROT05|Ashwin	pr|PROT05|Ashwin	intra-protein xl	mfaini_C1912_055.c.02743.02743.4_mfaini_C1912_055.c.02758.02758.4	127	84	43	3052.55	764.146	4	-2.7	0.46	0.39	28.01
SQHSGNAQVTQTKFLPNAPK-YIDNPKLR-a13-b6	pr|PROT02|DDX1	pr|PROT02|DDX1	intra-protein xl	mfaini_C1912_053.c.03235.03235.4_mfaini_C1912_053.c.03227.03227.4	281	317	36	3307.73	827.94	4	-0.6	0.38	0.33	27.9
ZSNAAGDVGGR-EQHEIKNETK-a1-b6	pr|PROT05|Ashwin	pr|PROT05|Ashwin	intra-protein xl	mfaini_C1912_053.c.00535.00535.3_mfaini_C1912_053.c.00526.00526.3	-2	84	86	2295.11	766.044	3	-0.5	0.28	0.2	27.79
KGHQFSCVCLHGDR-EVKEWHGCR-a1-b3	pr|PROT02|DDX1	pr|PROT02|DDX1	intra-protein xl	mfaini_C1912_056.c.01593.01593.5_mfaini_C1912_056.c.01585.01585.5	536	117	419	3037.39	608.485	5	-0.4	0.25	0.67	27.77
NFIVWLEDQKIR-HYKIEDR-a10-b3	pr|PROT04|CGI-99	pr|PROT04|CGI-99	intra-protein xl	mfaini_C1912_055.c.07397.07397.3_mfaini_C1912_055.c.07379.07379.3	36	41	5	2657.39	886.806	3	-1.2	0.41	0.79	27.43
DLVPDNSKTADNATK-LEYGDNAEKYK-a8-b9	pr|PROT04|CGI-99	pr|PROT04|CGI-99	intra-protein xl	mfaini_C1912_055.c.03241.03241.4_mfaini_C1912_055.c.03208.03208.4	108	98	10	3054.45	764.621	4	-4.9	0.61	0.34	27.25
LDDLVSTGKLNLSQVR-ATKGLMK-a9-b3	pr|PROT02|DDX1	pr|PROT02|DDX1	intra-protein xl	mfaini_C1912_056.c.05651.05651.3_mfaini_C1912_056.c.05630.05630.3	358	126	232	2642.47	881.831	3	0.7	0.47	0.34	27.1
APDGYIVKSQHSGNAQVTQTK-LDDLVSTGKLNLSQVR-a8-b9	pr|PROT02|DDX1	pr|PROT02|DDX1	intra-protein xl	mfaini_C1912_056.c.05144.05144.5_mfaini_C1912_056.c.05112.05112.5	268	358	90	4123.16	825.639	5	0.7	0.34	0.7	27.08
ALIVEPSRELAEQTLNNIKQFK-KYIDNPKLR-a19-b7	pr|PROT02|DDX1	pr|PROT02|DDX1	intra-protein xl	mfaini_C1912_055.c.07235.07235.4_mfaini_C1912_055.c.07217.07217.4	307	317	10	3824.12	957.039	4	0.8	0.44	0.43	26.93
TEHNNNDAKQNHDLTHR-LKPPPQASFTSNAFR-a9-b2	pr|PROT05|Ashwin	pr|PROT05|Ashwin	intra-protein xl	mfaini_C1912_053.c.01998.01998.5_mfaini_C1912_053.c.01983.01983.5	172	127	45	3840.86	769.18	5	-1.3	0.4	0.29	26.91
ELAEQTLNNIKQFKK-YIDNPKLR-a14-b6	pr|PROT02|DDX1	pr|PROT02|DDX1	intra-protein xl	mfaini_C1912_056.c.05111.05111.5_mfaini_C1912_056.c.05093.05093.5	310	317	7	2958.62	592.732	5	1	0.39	0.86	26.88
IASPEGQDYLKGMAAAGNYAWVNR-XLQADPNKVSAR-a11-b8	pr|PROT01|HSPC117	pr|PROT01|HSPC117	intra-protein xl	mfaini_C1912_053.c.07002.07002.4_mfaini_C1912_053.c.06975.06975.4	308	206	102	4063.99	1017	4	-0.2	0.3	0.72	26.38
ELAEQTLNNIKQFK-EVKEWHGCR-a11-b3	pr|PROT02|DDX1	pr|PROT02|DDX1	intra-protein xl	mfaini_C1912_055.c.05169.05169.4_mfaini_C1912_055.c.05158.05158.4	307	117	190	3012.51	754.136	4	0.1	0.21	0.69	26.32
ILKGEYAVR-VTYGQKR-a3-b6	pr|PROT02|DDX1	pr|PROT02|DDX1	intra-protein xl	mfaini_C1912_055.c.02122.02122.3_mfaini_C1912_055.c.02096.02096.3	493	693	200	2036.14	679.72	3	-2.3	0.31	0.38	26.31
EQLAQAMFDHIPVGVGSKGVIPMNAK-VASPKLVMEEAPESYK-a18-b5	pr|PROT01|HSPC117	pr|PROT01|HSPC117	intra-protein xl	mfaini_C1912_056.c.08182.08182.5_mfaini_C1912_056.c.08173.08173.5	158	465	307	4651.37	931.282	5	-0.4	0.28	0.56	25.98
ELQTKINEAIVAVQAIIADPK-LTQDAVAKANQTK-a5-b8	pr|PROT04|CGI-99	pr|PROT04|CGI-99	intra-protein xl	mfaini_C1912_055.c.11017.11017.4_mfaini_C1912_055.c.11006.11006.4	218	171	47	3788.1	948.034	4	2.9	0.3	0.4	25.97
EKTACAINK-VKTDDIAR-a2-b2	pr|PROT03|FAM98B	pr|PROT03|FAM98B	intra-protein xl	mfaini_C1912_056.c.01081.01081.3_mfaini_C1912_056.c.01052.01052.3	292	245	47	2088.08	697.036	3	-2	0.23	0.61	25.95
ZSNAAGDVGGR-KIQHVTWP-a1-b1	pr|PROT05|Ashwin	pr|PROT05|Ashwin	intra-protein xl	mfaini_C1912_054.c.03535.03535.3_mfaini_C1912_054.c.03522.03522.3	-2	225	227	2048.05	683.69	3	0.8	0.45	0.49	25.4
GGGVGGFLPAMKQIGNVAALPGIVHR-SYNDELQFLEKINK-a12-b11	pr|PROT01|HSPC117	pr|PROT01|HSPC117	intra-protein xl	mfaini_C1912_056.c.09910.09910.5_mfaini_C1912_056.c.09893.09893.5	67	14	53	4393.33	879.673	5	0.2	0.37	0.6	25.37
STTSDIPHMLNQVESKVK-DILSKVQK-a16-b5	pr|PROT03|FAM98B	pr|PROT03|FAM98B	intra-protein xl	mfaini_C1912_056.c.07472.07472.4_mfaini_C1912_056.c.07479.07479.4	177	184	7	3080.64	771.167	4	-1.7	0.43	0.68	25.31
LTALDYHNPAGFNCKDETEFR-NFIVWLEDQKIR-a15-b10	pr|PROT04|CGI-99	pr|PROT04|CGI-99	intra-protein xl	mfaini_C1912_056.c.08819.08819.4_mfaini_C1912_056.c.08796.08796.4	20	36	16	4195.04	1049.77	4	-2.3	0.55	0.57	25.22
LKPPPQASFTSNAFR-ZSNAAGDVGGR-a2-b1	pr|PROT05|Ashwin	pr|PROT05|Ashwin	intra-protein xl	mfaini_C1912_053.c.04407.04407.3_mfaini_C1912_053.c.04451.04451.3	127	-2	129	2700.36	901.128	3	-0.7	0.54	0.14	24.36
DLVPDNSKTADNATK-LGKVGR-a8-b3	pr|PROT04|CGI-99	pr|PROT04|CGI-99	intra-protein xl	mfaini_C1912_055.c.02279.02279.3_mfaini_C1912_055.c.02246.02246.3	108	241	133	2354.24	785.756	3	0.1	0.51	0.41	23.9
LKPPPQASFTSNAFR-KTENGDNDR-a2-b1	pr|PROT05|Ashwin	pr|PROT05|Ashwin	intra-protein xl	mfaini_C1912_053.c.02874.02874.3_mfaini_C1912_053.c.02881.02881.3	127	117	10	2845.4	949.474	3	-0.5	0.52	0.85	23.71
AAPKEEAEAMNNLKPPQAKR-KIQHVTWP-a19-b1	pr|PROT05|Ashwin	pr|PROT05|Ashwin	intra-protein xl	mfaini_C1912_054.c.03440.03440.4_mfaini_C1912_054.c.03419.03419.4	223	225	2	3337.74	835.444	4	-4.7	0.36	0.86	22.86
KRPLIVFDGSSTSTSIK-EQHEIKNETKR-a1-b10	pr|PROT05|Ashwin	pr|PROT05|Ashwin	intra-protein xl	mfaini_C1912_056.c.01969.01969.4_mfaini_C1912_056.c.01967.01967.4	98	88	10	3383.8	846.958	4	-1.5	0.28	0.65	22.79
EEAEAMNNLKPPQAKR-KIQHVTWP-a10-b1	pr|PROT05|Ashwin	pr|PROT05|Ashwin	intra-protein xl	mfaini_C1912_055.c.03742.03742.5_mfaini_C1912_055.c.03723.03723.5	218	225	7	2970.53	595.115	5	-1.6	0.18	0.89	22.66
STTSDIPHXLNQVESKVK-DILSKVQK-a16-b5	pr|PROT03|FAM98B	pr|PROT03|FAM98B	intra-protein xl	mfaini_C1912_056.c.05812.05812.4_mfaini_C1912_056.c.05786.05786.4	177	184	7	3096.64	775.168	4	0.9	0.38	0.47	22.52
KRPLIVFDGSSTSTSIK-EQHEIKNETKR-a1-b6	pr|PROT05|Ashwin	pr|PROT05|Ashwin	intra-protein xl	mfaini_C1912_053.c.01999.01999.4_mfaini_C1912_053.c.01980.01980.4	98	84	14	3383.8	846.959	4	-0.3	0.32	0.45	21.92
EEAEAMNNLKPPQAKR-RKIQHVTWP-a10-b2	pr|PROT05|Ashwin	pr|PROT05|Ashwin	intra-protein xl	mfaini_C1912_056.c.05553.05553.4_mfaini_C1912_056.c.05728.05728.4	218	225	7	3126.62	782.663	4	-6	0.28	0.66	21.77
TEHNNNDAKQNHDLTHR-KIQHVTWP-a9-b1	pr|PROT05|Ashwin	pr|PROT05|Ashwin	intra-protein xl	mfaini_C1912_055.c.01421.01421.4_mfaini_C1912_055.c.01480.01480.4	172	225	53	3188.55	798.146	4	0.5	0.32	0.64	21.66
EDLSKIIR-IYQPKR-a5-b5	pr|PROT03|FAM98B	pr|PROT03|FAM98B	intra-protein xl	mfaini_C1912_056.c.03181.03181.3_mfaini_C1912_056.c.03160.03160.3	280	256	24	1914.09	639.038	3	-1.5	0.2	0.73	21.64
NFIVWLEDQKIR-LEYGDNAEKYK-a10-b9	pr|PROT04|CGI-99	pr|PROT04|CGI-99	intra-protein xl	mfaini_C1912_054.c.08254.08254.3_mfaini_C1912_054.c.08217.08217.3	36	98	62	3026.53	1009.85	3	-3.2	0.38	0.6	21.23
QAFAKVFNTTPDDLDLHVIYDVSHNIAK-EQLAQAMFDHIPVGVGSKGVIPMNAK-a5-b18	pr|PROT01|HSPC117	pr|PROT01|HSPC117	intra-protein xl	mfaini_C1912_053.c.09862.09862.5_mfaini_C1912_053.c.10051.10051.5	334	158	176	6045.09	1210.03	5	0.9	0.19	0.63	20.3

## Sheet: Legend
Description of the column headers
Id	Assigned peptides and cross-linking sites within the peptide sequences. The longer peptide is designated as (a)lpha, the shorter as (b)eta.
Protein1	SwissProt/UniProt accession number and identifier of the protein 1 (containing peptide desginated as alpha).
Protein2	SwissProt/UniProt accession number and identifier of the protein 2 (containing peptide desginated as beta).
XLType	Intra- or inter-protein, sometimes also ambiguous.
Spectrum	References the actual MS/MS spectra that were used for the assignment.
AbsPos1	Position in the protein sequence of protein 1.
AbsPos2	Position in the protein sequence of protein 2.
deltaAA	Distance in the primary sequence (makes only sense for intra-proteins cross-links).
Mr	Molecular mass calculated from experimental m/z and z (neutral mass).
Mz	Experimentally observed mass-to-charge ratio of the precursor ion in Da.
z	Experimentally observed precursor charge.
Error [ppm]	Deviation between experimental and theoretical mass in ppm.
TIC	Fraction of the total ion current covered by assigned fragment ions.
delta score	Relative score for the top hit in relation to the second best hit for this spectrum, calculated as Id-score of 2nd best hit divided by Id-score of best hit. "0" means no second best hit exists.
Id-score	Identification score as assigned by xQuest. The higher, the better.
X in the peptide sequence represents oxidized methionine
Z at the start of the peptide sequence means that the cross-link is at the protein's N terminus
Residues are numbered according to the wild-type sequences of the proteins, with negative position values corresponding to a remnant of an N-terminal tag.
