# Supplementary material for: Molecular architecture of the human tRNA ligase complex
Source: eLife. 2021 Dec 2;10:e71656. doi: 10.7554/eLife.71656 (PMC8668186; doi:10.7554/eLife.71656)
Supplement: Figure 2—source data 2. [file elife-71656-fig2-data2.xlsx]

## Sheet: Replicate 1
Id	Protein1	Protein2	XLType	Spectrum	AbsPos1	AbsPos2	deltaAA	Mr	Mz	z	Error_rel[ppm]	TIC	deltaS	ld-Score
DILSKVQK-HYKIEDR-a5-b3	pr|PROT03|FAM98B	pr|PROT04|CGI-99	inter-protein xl	mfaini_C1912_032.c.03375.03375.3_mfaini_C1912_032.c.03342.03342.3	184	41		2027.1	676.709	3	-1.3	0.48	0.76	51.29
HDDYLVMLKAIR-LGKSHIR-a9-b3	pr|PROT04|CGI-99	pr|PROT02|DDX1	inter-protein xl	mfaini_C1912_033.c.04937.04937.4_mfaini_C1912_033.c.04923.04923.4	154	461		2420.33	606.09	4	-2.6	0.5	0.81	49.47
VKTDDIAR-LGKVGR-a2-b3	pr|PROT03|FAM98B	pr|PROT04|CGI-99	inter-protein xl	mfaini_C1912_032.c.01368.01368.4_mfaini_C1912_032.c.01312.01312.4	245	241		1682.96	421.748	4	-3.5	0.43	0	45.49
VASPKLVMEEAPESYK-GKGCYNTR-a5-b2	pr|PROT01|HSPC117	pr|PROT02|DDX1	inter-protein xl	mfaini_C1912_033.c.04023.04023.4_mfaini_C1912_033.c.03988.03988.4	465	636		2869.4	718.357	4	-0.2	0.42	0.19	45.39
LTALDYHNPAGFNCKDETEFR-EVKEWHGCR-a15-b3	pr|PROT04|CGI-99	pr|PROT02|DDX1	inter-protein xl	mfaini_C1912_035.c.04606.04606.4_mfaini_C1912_035.c.04581.04581.4	20	117		3834.75	959.695	4	-1.1	0.38	0.19	44.2
YALSPKTTITMAHLLAAR-HDDYLVMLKAIR-a6-b9	pr|PROT03|FAM98B	pr|PROT04|CGI-99	inter-protein xl	mfaini_C1912_032.c.09368.09368.4_mfaini_C1912_032.c.09358.09358.4	263	154		3567.92	892.987	4	-4.1	0.43	0.68	43.89
VEQHVVDGKER-LGKSHIR-a9-b3	pr|PROT01|HSPC117	pr|PROT02|DDX1	inter-protein xl	mfaini_C1912_033.c.00524.00524.4_mfaini_C1912_033.c.00521.00521.4	366	461		2242.21	561.561	4	-2.3	0.52	0.87	43.2
EHKMDQAIIFCR-VEQHVVDGKER-a3-b9	pr|PROT02|DDX1	pr|PROT01|HSPC117	inter-protein xl	mfaini_C1912_035.c.02998.02998.4_mfaini_C1912_035.c.02955.02955.4	505	366		2979.46	745.874	4	-1.7	0.29	0.29	43.11
INEAIVAVQAIIADPKTDHR-IYQPKR-a16-b5	pr|PROT04|CGI-99	pr|PROT03|FAM98B	inter-protein xl	mfaini_C1912_032.c.06705.06705.5_mfaini_C1912_032.c.06674.06674.5	234	256		3114.71	623.95	5	-2.6	0.58	0.45	42.45
TDDVHAKDNTRPGANSPEMWSEAIK-VEQHVVDGKER-a7-b9	pr|PROT02|DDX1	pr|PROT01|HSPC117	inter-protein xl	mfaini_C1912_032.c.03028.03028.5_mfaini_C1912_032.c.02978.02978.5	472	366		4201.01	841.21	5	-0.9	0.4	0.35	41.94
MHNQIPQVTSDGKR-DKIIVNDR-a13-b2	pr|PROT02|DDX1	pr|PROT01|HSPC117	inter-protein xl	mfaini_C1912_033.c.02621.02621.4_mfaini_C1912_033.c.02592.02592.4	399	285		2719.4	680.857	4	-4.3	0.45	0.32	41.9
INEAIVAVQAIIADPKTDHR-VKTDDIAR-a16-b2	pr|PROT04|CGI-99	pr|PROT03|FAM98B	inter-protein xl	mfaini_C1912_033.c.06776.06776.5_mfaini_C1912_033.c.06743.06743.5	234	245		3227.75	646.558	5	0.1	0.56	0.39	41.86
KGHQFSCVCLHGDR-DKIIVNDR-a1-b2	pr|PROT02|DDX1	pr|PROT01|HSPC117	inter-protein xl	mfaini_C1912_035.c.02251.02251.3_mfaini_C1912_035.c.02210.02210.3	536	285		2809.37	937.466	3	-0.8	0.37	0.77	41.34
AAGGGSYKGHVDILAPTVQELAALEK-MLQADPNKVSAR-a8-b8	pr|PROT02|DDX1	pr|PROT01|HSPC117	inter-protein xl	mfaini_C1912_034.c.07143.07143.5_mfaini_C1912_034.c.07141.07141.5	702	206		4061.11	813.23	5	-3.1	0.34	0.76	41.26
ANQTKEGLPVALDK-KMGIDHK-a5-b1	pr|PROT04|CGI-99	pr|PROT01|HSPC117	inter-protein xl	mfaini_C1912_032.c.02928.02928.3_mfaini_C1912_032.c.02897.02897.3	176	245		2448.3	817.107	3	-2.9	0.43	0.56	41.19
VASPKLVMEEAPESYK-MHNQIPQVTSDGKR-a5-b13	pr|PROT01|HSPC117	pr|PROT02|DDX1	inter-protein xl	mfaini_C1912_033.c.04296.04296.5_mfaini_C1912_033.c.04281.04281.5	465	399		3524.76	705.961	5	-0.3	0.5	0.32	41
KLTALDYHNPAGFNCKDETEFR-GKGCYNTR-a16-b2	pr|PROT04|CGI-99	pr|PROT02|DDX1	inter-protein xl	mfaini_C1912_033.c.03533.03533.4_mfaini_C1912_033.c.03520.03520.4	20	636		3717.73	930.441	4	0.5	0.59	0.27	40.67
LTQDAVAKANQTK-EKTACAINK-a8-b2	pr|PROT04|CGI-99	pr|PROT03|FAM98B	inter-protein xl	mfaini_C1912_032.c.01608.01608.4_mfaini_C1912_032.c.01586.01586.4	171	292		2558.33	640.591	4	-2	0.36	0.49	40.1
VEQHVVDGKER-EVKEWHGCR-a9-b3	pr|PROT01|HSPC117	pr|PROT02|DDX1	inter-protein xl	mfaini_C1912_033.c.01006.01006.4_mfaini_C1912_033.c.00977.00977.4	366	117		2632.28	659.077	4	-2	0.23	0.67	39.82
LTALDYHNPAGFNCKDETEFR-VEQHVVDGKER-a15-b9	pr|PROT04|CGI-99	pr|PROT01|HSPC117	inter-protein xl	mfaini_C1912_033.c.03962.03962.4_mfaini_C1912_033.c.03925.03925.4	20	366		3929.85	983.471	4	-2.9	0.42	0.24	39.79
VEQHVVDGKER-HYKIEDR-a9-b3	pr|PROT01|HSPC117	pr|PROT04|CGI-99	inter-protein xl	mfaini_C1912_034.c.00744.00744.4_mfaini_C1912_034.c.00710.00710.4	366	41		2392.21	599.06	4	-1.6	0.49	0.74	39.69
LTQDAVAKANQTK-IYQPKR-a8-b5	pr|PROT04|CGI-99	pr|PROT03|FAM98B	inter-protein xl	mfaini_C1912_035.c.01711.01711.4_mfaini_C1912_035.c.01690.01690.4	171	256		2328.28	583.077	4	-2.3	0.46	0.4	39.5
KGHQFSCVCLHGDR-VEQHVVDGKER-a1-b9	pr|PROT02|DDX1	pr|PROT01|HSPC117	inter-protein xl	mfaini_C1912_033.c.01014.01014.4_mfaini_C1912_033.c.01013.01013.4	536	366		3132.49	784.13	4	-2.7	0.45	0.34	39.31
LTQDAVAKANQTK-EDLSKIIR-a8-b5	pr|PROT04|CGI-99	pr|PROT03|FAM98B	inter-protein xl	mfaini_C1912_033.c.03575.03575.3_mfaini_C1912_033.c.03544.03544.3	171	280		2497.37	833.464	3	-2.2	0.38	0.48	39.3
MLQADPNKVSAR-VTYGQKR-a8-b6	pr|PROT01|HSPC117	pr|PROT02|DDX1	inter-protein xl	mfaini_C1912_034.c.02046.02046.4_mfaini_C1912_034.c.02025.02025.4	206	693		2317.22	580.312	4	-2.2	0.56	0.52	39.2
LTQDAVAKANQTK-KMGIDHK-a8-b1	pr|PROT04|CGI-99	pr|PROT01|HSPC117	inter-protein xl	mfaini_C1912_033.c.01300.01300.4_mfaini_C1912_033.c.01234.01234.4	171	245		2352.24	589.068	4	-2.2	0.38	0.35	38.79
LTQDAVAKANQTK-DILSKVQK-a8-b5	pr|PROT04|CGI-99	pr|PROT03|FAM98B	inter-protein xl	mfaini_C1912_033.c.03724.03724.4_mfaini_C1912_033.c.03699.03699.4	171	184		2454.36	614.598	4	-3.7	0.56	0.75	38.72
VASPKLVMEEAPESYK-LGKSHIR-a5-b3	pr|PROT01|HSPC117	pr|PROT02|DDX1	inter-protein xl	mfaini_C1912_035.c.03624.03624.4_mfaini_C1912_035.c.03601.03601.4	465	461		2724.45	682.119	4	-2	0.38	0.88	38.66
ANQTKEGLPVALDK-NHVGKPLLK-a5-b5	pr|PROT04|CGI-99	pr|PROT03|FAM98B	inter-protein xl	mfaini_C1912_035.c.03460.03460.4_mfaini_C1912_035.c.03432.03432.4	176	192		2625.48	657.378	4	-1.1	0.33	0.88	38.65
LDDLVSTGKLNLSQVR-VASPKLVMEEAPESYK-a9-b5	pr|PROT02|DDX1	pr|PROT01|HSPC117	inter-protein xl	mfaini_C1912_032.c.07957.07957.4_mfaini_C1912_032.c.07936.07936.4	358	465		3671.93	918.991	4	0	0.44	0.53	38.31
VASPKLVMEEAPESYK-MGLAISLVATEKEK-a5-b12	pr|PROT01|HSPC117	pr|PROT02|DDX1	inter-protein xl	mfaini_C1912_033.c.07602.07602.4_mfaini_C1912_033.c.07585.07585.4	465	623		3403.79	851.954	4	-0.4	0.39	0.48	38.08
LTALDYHNPAGFNCKDETEFR-VKTDDIAR-a15-b2	pr|PROT04|CGI-99	pr|PROT03|FAM98B	inter-protein xl	mfaini_C1912_033.c.04655.04655.4_mfaini_C1912_033.c.04664.04664.4	20	245		3551.69	888.931	4	-2.2	0.42	0.26	38.07
VASPKLVMEEAPESYK-TTIKTGASVLNK-a5-b4	pr|PROT01|HSPC117	pr|PROT02|DDX1	inter-protein xl	mfaini_C1912_033.c.05231.05231.4_mfaini_C1912_033.c.05222.05222.4	465	82		3146.67	787.676	4	-2	0.28	0.38	37.92
GPEPGPQPTMEGDVLDTLEALGYKGPLLEEQALTK-YKDLVPDNSK-a24-b2	pr|PROT03|FAM98B	pr|PROT04|CGI-99	inter-protein xl	mfaini_C1912_032.c.12564.12564.4_mfaini_C1912_032.c.12476.12476.4	26	100		5008.52	1253.14	4	0.7	0.43	0.85	37.85
DKIIVNDR-VTYGQKR-a2-b6	pr|PROT01|HSPC117	pr|PROT02|DDX1	inter-protein xl	mfaini_C1912_033.c.01996.01996.4_mfaini_C1912_033.c.01974.01974.4	285	693		1960.07	491.025	4	-1.9	0.58	0.58	37.61
TDDVHAKDNTRPGANSPEMWSEAIK-DKIIVNDR-a7-b2	pr|PROT02|DDX1	pr|PROT01|HSPC117	inter-protein xl	mfaini_C1912_034.c.04390.04390.4_mfaini_C1912_034.c.04359.04359.4	472	285		3877.9	970.482	4	1.3	0.53	0.39	37.26
HDDYLVMLKAIR-IYQPKR-a9-b5	pr|PROT04|CGI-99	pr|PROT03|FAM98B	inter-protein xl	mfaini_C1912_033.c.05759.05759.4_mfaini_C1912_033.c.05725.05725.4	154	256		2414.32	604.587	4	0.6	0.67	0.66	37.09
KGHQFSCVCLHGDR-LGKVGR-a1-b3	pr|PROT02|DDX1	pr|PROT04|CGI-99	inter-protein xl	mfaini_C1912_032.c.01396.01396.5_mfaini_C1912_032.c.01330.01330.5	536	241		2466.23	494.254	5	-1.7	0.4	0.38	36.59
ANQTKEGLPVALDK-EDLSKIIR-a5-b5	pr|PROT04|CGI-99	pr|PROT03|FAM98B	inter-protein xl	mfaini_C1912_034.c.05522.05522.3_mfaini_C1912_034.c.05499.05499.3	176	280		2593.43	865.485	3	-1	0.36	0.44	36.52
TADNATKNAEPLINLDVNNPDFK-KQNLER-a7-b1	pr|PROT04|CGI-99	pr|PROT02|DDX1	inter-protein xl	mfaini_C1912_035.c.05430.05430.4_mfaini_C1912_035.c.05405.05405.4	115	555		3437.74	860.442	4	-1.6	0.36	0.39	36.39
EDLSKIIR-KMGIDHK-a5-b1	pr|PROT03|FAM98B	pr|PROT01|HSPC117	inter-protein xl	mfaini_C1912_034.c.02999.02999.4_mfaini_C1912_034.c.02975.02975.4	280	245		1938.06	485.523	4	-1.1	0.36	0.61	36.35
LTQDAVAKANQTK-VQKNHVGKPLLK-a8-b3	pr|PROT04|CGI-99	pr|PROT03|FAM98B	inter-protein xl	mfaini_C1912_032.c.01142.01142.3_mfaini_C1912_032.c.01130.01130.3	171	187		2884.64	962.555	3	-2.4	0.35	0.85	36.26
LTALDYHNPAGFNCKDETEFR-GKGCYNTR-a15-b2	pr|PROT04|CGI-99	pr|PROT02|DDX1	inter-protein xl	mfaini_C1912_035.c.04370.04370.4_mfaini_C1912_035.c.04325.04325.4	20	636		3589.62	898.412	4	-5	0.62	0.13	36.03
EGLPVALDKHILGFDTGDAVLNEAAQILR-NVTDVVNTCHDAGISKK-a9-b16	pr|PROT04|CGI-99	pr|PROT01|HSPC117	inter-protein xl	mfaini_C1912_033.c.10142.10142.4_mfaini_C1912_033.c.10110.10110.4	185	492		5069.63	1268.41	4	2.9	0.37	0.64	35.85
DKIIVNDR-LGKSHIR-a2-b3	pr|PROT01|HSPC117	pr|PROT02|DDX1	inter-protein xl	mfaini_C1912_033.c.01596.01596.3_mfaini_C1912_033.c.01576.01576.3	285	461		1919.09	640.705	3	-1.8	0.58	0.78	35.84
IYQPKR-LGKVGR-a5-b3	pr|PROT03|FAM98B	pr|PROT04|CGI-99	inter-protein xl	mfaini_C1912_032.c.01015.01015.4_mfaini_C1912_032.c.01164.01164.4	256	241		1569.93	393.491	4	-1.8	0.4	0	35.61
HYKIEDR-VTYGQKR-a3-b6	pr|PROT04|CGI-99	pr|PROT02|DDX1	inter-protein xl	mfaini_C1912_034.c.00860.00860.3_mfaini_C1912_034.c.00817.00817.3	41	693		1948.01	650.345	3	-2.5	0.42	0.51	35.56
DKIIVNDR-LGKVGR-a2-b3	pr|PROT01|HSPC117	pr|PROT04|CGI-99	inter-protein xl	mfaini_C1912_032.c.02318.02318.3_mfaini_C1912_032.c.02277.02277.3	285	241		1738.01	580.343	3	-2.7	0.39	0.51	35.46
DVNCPFKIQDR-KKEDCLK-a7-b2	pr|PROT04|CGI-99	pr|PROT03|FAM98B	inter-protein xl	mfaini_C1912_032.c.02633.02633.3_mfaini_C1912_032.c.02593.02593.3	72	110		2448.2	817.076	3	-3.9	0.45	0.84	35.31
MLQADPNKVSAR-LGKSHIR-a8-b3	pr|PROT01|HSPC117	pr|PROT02|DDX1	inter-protein xl	mfaini_C1912_032.c.01693.01693.4_mfaini_C1912_032.c.01675.01675.4	206	461		2276.24	570.068	4	-1.4	0.5	0.85	35.04
KQNLER-LGKVGR-a1-b3	pr|PROT02|DDX1	pr|PROT04|CGI-99	inter-protein xl	mfaini_C1912_035.c.00686.00686.3_mfaini_C1912_035.c.00682.00682.3	555	241		1552.9	518.641	3	-3.6	0.42	0.79	34.97
LEYGDNAEKYK-HKNSQLDK-a9-b2	pr|PROT04|CGI-99	pr|PROT03|FAM98B	inter-protein xl	mfaini_C1912_034.c.01117.01117.3_mfaini_C1912_034.c.01090.01090.3	98	136		2435.2	812.74	3	-0.8	0.54	0.74	34.95
ILKGEYAVR-LGKVGR-a3-b3	pr|PROT02|DDX1	pr|PROT04|CGI-99	inter-protein xl	mfaini_C1912_033.c.02426.02426.3_mfaini_C1912_033.c.02382.02382.3	493	241		1814.08	605.7	3	-1.2	0.56	0.85	34.68
VASPKLVMEEAPESYK-EVKEWHGCR-a5-b3	pr|PROT01|HSPC117	pr|PROT02|DDX1	inter-protein xl	mfaini_C1912_034.c.04413.04413.4_mfaini_C1912_034.c.04402.04402.4	465	117		3114.51	779.635	4	-2.4	0.38	0.21	34.63
ANQTKEGLPVALDK-VQKNHVGKPLLK-a5-b3	pr|PROT04|CGI-99	pr|PROT03|FAM98B	inter-protein xl	mfaini_C1912_033.c.02356.02356.5_mfaini_C1912_033.c.02297.02297.5	176	187		2980.7	597.148	5	-2.5	0.37	0.89	34.58
YALSPKTTITMAHLLAAR-AIKEHK-a6-b3	pr|PROT03|FAM98B	pr|PROT02|DDX1	inter-protein xl	mfaini_C1912_033.c.04992.04992.4_mfaini_C1912_033.c.04945.04945.4	263	502		2819.57	705.901	4	-0.7	0.56	0.49	34.46
TDDVHAKDNTRPGANSPEMWSEAIK-LGKVGR-a7-b3	pr|PROT02|DDX1	pr|PROT04|CGI-99	inter-protein xl	mfaini_C1912_034.c.03487.03487.5_mfaini_C1912_034.c.03445.03445.5	472	241		3534.76	707.959	5	1.2	0.5	0.47	33.85
LGKSHIR-LGKVGR-a3-b3	pr|PROT02|DDX1	pr|PROT04|CGI-99	inter-protein xl	mfaini_C1912_033.c.00579.00579.3_mfaini_C1912_033.c.00570.00570.3	461	241		1575.95	526.325	3	-3.2	0.31	0.83	32.87
LTALDYHNPAGFNCKDETEFR-LGKSHIR-a15-b3	pr|PROT04|CGI-99	pr|PROT02|DDX1	inter-protein xl	mfaini_C1912_033.c.03874.03874.5_mfaini_C1912_033.c.03851.03851.5	20	461		3444.68	689.944	5	-2.7	0.7	0.86	32.7
KEDCLKLLLFLSTELQASQILQNK-DVNCPFKIQDR-a6-b7	pr|PROT03|FAM98B	pr|PROT04|CGI-99	inter-protein xl	mfaini_C1912_033.c.11682.11682.5_mfaini_C1912_033.c.11645.11645.5	115	72		4360.28	873.065	5	0.6	0.27	0.89	32.55
EVKEWHGCR-DKIIVNDR-a3-b2	pr|PROT02|DDX1	pr|PROT01|HSPC117	inter-protein xl	mfaini_C1912_033.c.02350.02350.3_mfaini_C1912_033.c.02327.02327.3	117	285		2309.15	770.725	3	-2.6	0.31	0.71	32.53
VKTDDIAR-VTYGQKR-a2-b6	pr|PROT03|FAM98B	pr|PROT02|DDX1	inter-protein xl	mfaini_C1912_033.c.01102.01102.3_mfaini_C1912_033.c.01078.01078.3	245	693		1905.03	636.018	3	-0.8	0.49	0.35	32.49
LTALDYHNPAGFNCKDETEFR-KQNLER-a15-b1	pr|PROT04|CGI-99	pr|PROT02|DDX1	inter-protein xl	mfaini_C1912_032.c.04415.04415.5_mfaini_C1912_032.c.04389.04389.5	20	555		3421.63	685.334	5	-1.8	0.7	0.41	32.3
HYKIEDR-IYQPKR-a3-b5	pr|PROT04|CGI-99	pr|PROT03|FAM98B	inter-protein xl	mfaini_C1912_034.c.00975.00975.3_mfaini_C1912_034.c.00952.00952.3	41	256		1901.01	634.678	3	-3.6	0.37	0.57	32.29
TDDVHAKDNTRPGANSPEMWSEAIK-LTALDYHNPAGFNCKDETEFR-a7-b15	pr|PROT02|DDX1	pr|PROT04|CGI-99	inter-protein xl	mfaini_C1912_032.c.05712.05712.5_mfaini_C1912_032.c.05759.05759.5	472	20		5403.46	1081.7	5	-3.7	0.37	0.29	32.27
LTQDAVAKANQTK-LGKSHIR-a8-b3	pr|PROT04|CGI-99	pr|PROT02|DDX1	inter-protein xl	mfaini_C1912_033.c.00964.00964.4_mfaini_C1912_033.c.00942.00942.4	171	461		2334.3	584.583	4	0.2	0.5	0.41	32.12
LGKSHIR-IYQPKR-a3-b5	pr|PROT02|DDX1	pr|PROT03|FAM98B	inter-protein xl	mfaini_C1912_032.c.00648.00648.3_mfaini_C1912_032.c.00637.00637.3	461	256		1751.02	584.68	3	-2.5	0.56	0.84	32.02
TDDVHAKDNTRPGANSPEMWSEAIK-MLQADPNKVSAR-a7-b8	pr|PROT02|DDX1	pr|PROT01|HSPC117	inter-protein xl	mfaini_C1912_033.c.04024.04024.4_mfaini_C1912_033.c.04022.04022.4	472	206		4235.04	1059.77	4	-0.2	0.44	0.56	31.83
VTYGQKR-IYQPKR-a6-b5	pr|PROT02|DDX1	pr|PROT03|FAM98B	inter-protein xl	mfaini_C1912_033.c.00882.00882.3_mfaini_C1912_033.c.00871.00871.3	693	256		1792	598.34	3	-2.2	0.47	0.75	31.7
VKTDDIAR-LGKSHIR-a2-b3	pr|PROT03|FAM98B	pr|PROT02|DDX1	inter-protein xl	mfaini_C1912_033.c.00761.00761.3_mfaini_C1912_033.c.00738.00738.3	245	461		1864.05	622.357	3	-2.8	0.28	0.82	31.68
VEQHVVDGKER-VTYGQKR-a9-b6	pr|PROT01|HSPC117	pr|PROT02|DDX1	inter-protein xl	mfaini_C1912_035.c.00670.00670.3_mfaini_C1912_035.c.00671.00671.3	366	693		2283.19	762.071	3	-3.3	0.57	0.25	31.61
TDDVHAKDNTRPGANSPEMWSEAIK-IYQPKR-a7-b5	pr|PROT02|DDX1	pr|PROT03|FAM98B	inter-protein xl	mfaini_C1912_033.c.03298.03298.4_mfaini_C1912_033.c.03237.03237.4	472	256		3709.8	928.458	4	-4.2	0.5	0.83	31.6
LTALDYHNPAGFNCKDETEFR-IYQPKR-a15-b5	pr|PROT04|CGI-99	pr|PROT03|FAM98B	inter-protein xl	mfaini_C1912_034.c.04586.04586.4_mfaini_C1912_034.c.04559.04559.4	20	256		3438.67	860.675	4	0.5	0.46	0.77	31.55
ELQTKINEAIVAVQAIIADPK-IYQPKR-a5-b5	pr|PROT04|CGI-99	pr|PROT03|FAM98B	inter-protein xl	mfaini_C1912_033.c.11471.11471.3_mfaini_C1912_033.c.11528.11528.3	218	256		3204.81	1069.28	3	-0.6	0.34	0	31.51
TDDVHAKDNTRPGANSPEMWSEAIK-VKTDDIAR-a7-b2	pr|PROT02|DDX1	pr|PROT03|FAM98B	inter-protein xl	mfaini_C1912_032.c.03655.03655.5_mfaini_C1912_032.c.03617.03617.5	472	245		3822.84	765.576	5	-2.4	0.27	0.34	31.39
DKIIVNDR-KQNLER-a2-b1	pr|PROT01|HSPC117	pr|PROT02|DDX1	inter-protein xl	mfaini_C1912_033.c.01806.01806.3_mfaini_C1912_033.c.01793.01793.3	285	555		1896.03	633.019	3	-4.7	0.43	0.26	31.13
LEYGDNAEKYK-IYQPKR-a9-b5	pr|PROT04|CGI-99	pr|PROT03|FAM98B	inter-protein xl	mfaini_C1912_033.c.02158.02158.3_mfaini_C1912_033.c.02141.02141.3	98	256		2270.15	757.726	3	-2	0.57	0.76	30.96
EHKMDQAIIFCR-IYQPKR-a3-b5	pr|PROT02|DDX1	pr|PROT03|FAM98B	inter-protein xl	mfaini_C1912_033.c.03371.03371.4_mfaini_C1912_033.c.03337.03337.4	505	256		2488.27	623.074	4	-2.4	0.41	0.47	30.61
STTSDIPHMLNQVESKVK-LTQDAVAKANQTK-a16-b8	pr|PROT03|FAM98B	pr|PROT04|CGI-99	inter-protein xl	mfaini_C1912_035.c.06020.06020.4_mfaini_C1912_035.c.06001.06001.4	177	171		3537.82	885.463	4	-3.4	0.44	0.46	30.31
YALSPKTTITMAHLLAAR-LEYGDNAEKYK-a6-b9	pr|PROT03|FAM98B	pr|PROT04|CGI-99	inter-protein xl	mfaini_C1912_033.c.06838.06838.4_mfaini_C1912_033.c.06823.06823.4	263	98		3423.76	856.949	4	-3.4	0.46	0.42	30.11
YKDLVPDNSK-HKNSQLDK-a2-b2	pr|PROT04|CGI-99	pr|PROT03|FAM98B	inter-protein xl	mfaini_C1912_035.c.01340.01340.4_mfaini_C1912_035.c.01297.01297.4	100	136		2284.16	572.048	4	-3.9	0.33	0.87	29.95
TKIDCDNLEQYFIQQGGGPDK-MLQADPNKVSAR-a2-b8	pr|PROT02|DDX1	pr|PROT01|HSPC117	inter-protein xl	mfaini_C1912_032.c.07199.07199.4_mfaini_C1912_032.c.07201.07201.4	516	206		3891.88	973.977	4	0.3	0.27	0.31	29.86
VASPKLVMEEAPESYK-KQNLER-a5-b1	pr|PROT01|HSPC117	pr|PROT02|DDX1	inter-protein xl	mfaini_C1912_035.c.04180.04180.3_mfaini_C1912_035.c.04158.04158.3	465	555		2701.4	901.475	3	0.5	0.59	0.25	29.68
EKTACAINK-LGKVGR-a2-b3	pr|PROT03|FAM98B	pr|PROT04|CGI-99	inter-protein xl	mfaini_C1912_033.c.00893.00893.3_mfaini_C1912_033.c.00862.00862.3	292	241		1799.99	601.004	3	-2.3	0.24	0.82	29.47
LTALDYHNPAGFNCKDETEFR-KGHQFSCVCLHGDR-a15-b1	pr|PROT04|CGI-99	pr|PROT02|DDX1	inter-protein xl	mfaini_C1912_032.c.04307.04307.5_mfaini_C1912_032.c.04289.04289.5	20	536		4334.95	867.999	5	-3.2	0.28	0.2	29.38
STTSDIPHMLNQVESKVK-HYKIEDR-a16-b3	pr|PROT03|FAM98B	pr|PROT04|CGI-99	inter-protein xl	mfaini_C1912_033.c.05635.05635.4_mfaini_C1912_033.c.05589.05589.4	177	41		3110.57	778.65	4	-0.6	0.44	0.7	29.2
LTALDYHNPAGFNCKDETEFR-VTYGQKR-a15-b6	pr|PROT04|CGI-99	pr|PROT02|DDX1	inter-protein xl	mfaini_C1912_034.c.04487.04487.5_mfaini_C1912_034.c.04500.04500.5	20	693		3485.66	698.141	5	-0.6	0.37	0.67	29.13
KGHQFSCVCLHGDR-VKTDDIAR-a1-b2	pr|PROT02|DDX1	pr|PROT03|FAM98B	inter-protein xl	mfaini_C1912_032.c.01682.01682.4_mfaini_C1912_032.c.01660.01660.4	536	245		2754.33	689.589	4	-2.4	0.19	0.28	29.03
AAGGGSYKGHVDILAPTVQELAALEK-IASPEGQDYLKGMAAAGNYAWVNR-a8-b11	pr|PROT02|DDX1	pr|PROT01|HSPC117	inter-protein xl	mfaini_C1912_035.c.09373.09373.5_mfaini_C1912_035.c.09375.09375.5	702	308		5313.68	1063.74	5	1.3	0.38	0.54	28.46
AAGGGSYKGHVDILAPTVQELAALEK-VKTDDIAR-a8-b2	pr|PROT02|DDX1	pr|PROT03|FAM98B	inter-protein xl	mfaini_C1912_033.c.07000.07000.4_mfaini_C1912_033.c.06968.06968.4	702	245		3648.92	913.238	4	-4	0.36	0.3	26.9
DVSIXPFKIIAADNGDAWVEVK-NGKDLGLAFEIPPHMK-a8-b3	sp|P0A6Y8|DNAK_ECOLI	pr|PROT02|DDX1	inter-protein xl	mfaini_C1912_032.c.10094.10094.4_mfaini_C1912_032.c.09339.09339.4	92	210		4337.2	1085.31	4	-3.1	0.3	0.51	26.5		cross-link with contaminant
EVKEWHGCR-LGKVGR-a3-b3	pr|PROT02|DDX1	pr|PROT04|CGI-99	inter-protein xl	mfaini_C1912_032.c.01479.01479.4_mfaini_C1912_032.c.01413.01413.4	117	241		1966.02	492.512	4	-2.5	0.24	0.42	26.48
EQLAQAMFDHIPVGVGSKGVIPMNAK-INEAIVAVQAIIADPKTDHR-a18-b16	pr|PROT01|HSPC117	pr|PROT04|CGI-99	inter-protein xl	mfaini_C1912_032.c.10109.10109.5_mfaini_C1912_032.c.10054.10054.5	158	234		5047.65	1010.54	5	-2.3	0.36	0.71	26.23
DKIIVNDR-DQQEGKK-a2-b6	pr|PROT01|HSPC117	pr|PROT02|DDX1	inter-protein xl	mfaini_C1912_032.c.01382.01382.3_mfaini_C1912_032.c.01319.01319.3	285	75		1941.02	648.013	3	-0.1	0.22	0.83	26.12
FFEKYLR-VTYGQKR-a4-b6	pr|PROT04|CGI-99	pr|PROT02|DDX1	inter-protein xl	mfaini_C1912_033.c.03977.03977.3_mfaini_C1912_033.c.03946.03946.3	62	693		1990.06	664.363	3	-1.7	0.4	0.81	25.37
EMACPYSVLISGDIKDR-LDDLVSTGKLNLSQVR-a15-b9	pr|PROT03|FAM98B	pr|PROT02|DDX1	inter-protein xl	mfaini_C1912_033.c.09065.09065.4_mfaini_C1912_033.c.09057.09057.4	104	358		3847.97	963.002	4	1.3	0.44	0.67	24.24
GLPQLGTLGAGNHYAEIQVVDEIFNEYAAKK-ANQTKEGLPVALDK-a30-b5	pr|PROT01|HSPC117	pr|PROT04|CGI-99	inter-protein xl	mfaini_C1912_035.c.10122.10122.4_mfaini_C1912_035.c.10095.10095.4	244	176		4965.58	1242.4	4	-0.2	0.35	0.82	23.9
EDLSKIIR-KXGIDHK-a5-b1	pr|PROT03|FAM98B	pr|PROT01|HSPC117	inter-protein xl	mfaini_C1912_033.c.02114.02114.3_mfaini_C1912_033.c.02084.02084.3	280	245		1954.05	652.358	3	-2.7	0.16	0.86	23.83
EHKMDQAIIFCR-DKIIVNDR-a3-b2	pr|PROT02|DDX1	pr|PROT01|HSPC117	inter-protein xl	mfaini_C1912_034.c.04757.04757.3_mfaini_C1912_034.c.04726.04726.3	505	285		2656.34	886.454	3	-2.6	0.19	0.49	23.43
NIHSSDWPKFFEK-IYQPKR-a9-b5	pr|PROT04|CGI-99	pr|PROT03|FAM98B	inter-protein xl	mfaini_C1912_033.c.04277.04277.4_mfaini_C1912_033.c.04262.04262.4	58	256		2575.32	644.838	4	-1.3	0.44	0.7	22.48
DKNSGKEQK-VSARAKK-a6-b6	sp|P0A6Y8|DNAK_ECOLI	pr|PROT01|HSPC117	inter-protein xl	mfaini_C1912_035.c.02370.02370.3_mfaini_C1912_035.c.02345.02345.3	495	212		1929.07	644.031	3	2.6	0.26	0.8	22.48		cross-link with contaminant
VEQHVVDGKER-FFEKYLR-a9-b4	pr|PROT01|HSPC117	pr|PROT04|CGI-99	inter-protein xl	mfaini_C1912_033.c.03427.03427.3_mfaini_C1912_033.c.03408.03408.3	366	62		2434.26	812.427	3	-2.3	0.37	0.46	22.13
GKHYYEVSCHDQGLCR-GHVKFSK-a2-b4	pr|PROT02|DDX1	pr|PROT02|DDX1	intra-protein xl	mfaini_C1912_032.c.01487.01487.3_mfaini_C1912_032.c.01470.01470.3	132	204	72	2947.38	983.468	3	-1.7	0.43	0.16	49.1
FLPNAPKALIVEPSR-MHNQIPQVTSDGKR-a7-b13	pr|PROT02|DDX1	pr|PROT02|DDX1	intra-protein xl	mfaini_C1912_033.c.04719.04719.5_mfaini_C1912_033.c.04658.04658.5	288	399	111	3398.81	680.77	5	-1.1	0.48	0.37	48.05
FLPNAPKALIVEPSR-DQQEGKK-a7-b6	pr|PROT02|DDX1	pr|PROT02|DDX1	intra-protein xl	mfaini_C1912_032.c.04613.04613.4_mfaini_C1912_032.c.04622.04622.4	288	75	213	2620.41	656.111	4	-3	0.49	0.81	45.93
SQHSGNAQVTQTKFLPNAPK-TTIKTGASVLNK-a13-b4	pr|PROT02|DDX1	pr|PROT02|DDX1	intra-protein xl	mfaini_C1912_032.c.03469.03469.4_mfaini_C1912_032.c.03424.03424.4	281	82	199	3521.87	881.475	4	-4.1	0.44	0.31	45.08
KGHQFSCVCLHGDR-EVKEWHGCR-a1-b3	pr|PROT02|DDX1	pr|PROT02|DDX1	intra-protein xl	mfaini_C1912_032.c.01736.01736.4_mfaini_C1912_032.c.01713.01713.4	536	117	419	3037.38	760.354	4	-0.7	0.29	0.28	44.91
HDDYLVMLKAIR-LGKVGR-a9-b3	pr|PROT04|CGI-99	pr|PROT04|CGI-99	intra-protein xl	mfaini_C1912_032.c.06254.06254.4_mfaini_C1912_032.c.06222.06222.4	154	241	87	2239.24	560.819	4	-3.2	0.57	0.7	44.9
LDDLVSTGKLNLSQVR-EVKEWHGCR-a9-b3	pr|PROT02|DDX1	pr|PROT02|DDX1	intra-protein xl	mfaini_C1912_033.c.05295.05295.5_mfaini_C1912_033.c.05271.05271.5	360	117	241	3094.58	619.924	5	-2	0.35	0.87	44.55
LGKSHIR-AIKEHK-a3-b3	pr|PROT02|DDX1	pr|PROT02|DDX1	intra-protein xl	mfaini_C1912_034.c.00484.00484.3_mfaini_C1912_034.c.00485.00485.3	461	502	41	1671.98	558.334	3	-0.2	0.44	0.74	44.48
TKIDCDNLEQYFIQQGGGPDK-GKGCYNTR-a2-b2	pr|PROT02|DDX1	pr|PROT02|DDX1	intra-protein xl	mfaini_C1912_034.c.06215.06215.4_mfaini_C1912_034.c.06061.06061.4	516	636	120	3517.62	880.413	4	-0.8	0.46	0.3	44.44
SQHSGNAQVTQTKFLPNAPK-GLMKGK-a13-b4	pr|PROT02|DDX1	pr|PROT02|DDX1	intra-protein xl	mfaini_C1912_032.c.02688.02688.5_mfaini_C1912_032.c.02665.02665.5	281	130	151	2922.53	585.514	5	-2.9	0.4	0.89	44.38
LTQDAVAKANQTK-LGKVGR-a8-b3	pr|PROT04|CGI-99	pr|PROT04|CGI-99	intra-protein xl	mfaini_C1912_035.c.01712.01712.4_mfaini_C1912_035.c.01687.01687.4	171	241	70	2153.21	539.311	4	-2.1	0.6	0.74	44.18
VQKNHVGKPLLK-VKDILSK-a3-b2	pr|PROT03|FAM98B	pr|PROT03|FAM98B	intra-protein xl	mfaini_C1912_033.c.01579.01579.5_mfaini_C1912_033.c.01574.01574.5	187	179	8	2299.39	460.887	5	-2.2	0.42	0.74	43.7
TGASVLNKWQMNPYDR-ATKGLMK-a8-b3	pr|PROT02|DDX1	pr|PROT02|DDX1	intra-protein xl	mfaini_C1912_032.c.06009.06009.4_mfaini_C1912_032.c.05986.05986.4	90	126	36	2764.39	692.106	4	-3.7	0.38	0.47	42.83
TGASVLNKWQMNPYDR-DQQEGKK-a8-b6	pr|PROT02|DDX1	pr|PROT02|DDX1	intra-protein xl	mfaini_C1912_033.c.04962.04962.4_mfaini_C1912_033.c.04934.04934.4	90	75	15	2848.38	713.103	4	-0.5	0.38	0.86	42.73
NQALFPACVLKNAELK-EVKEWHGCR-a11-b3	pr|PROT02|DDX1	pr|PROT02|DDX1	intra-protein xl	mfaini_C1912_033.c.05699.05699.5_mfaini_C1912_033.c.05687.05687.5	234	117	117	3152.59	631.525	5	-1.2	0.66	0.69	42.62
TKIDCDNLEQYFIQQGGGPDKK-GKGCYNTR-a2-b2	pr|PROT02|DDX1	pr|PROT02|DDX1	intra-protein xl	mfaini_C1912_035.c.05249.05249.5_mfaini_C1912_035.c.05195.05195.5	516	636	120	3645.72	730.152	5	-0.2	0.42	0.3	42.17
MHNQIPQVTSDGKR-GKGCYNTR-a13-b2	pr|PROT02|DDX1	pr|PROT02|DDX1	intra-protein xl	mfaini_C1912_035.c.01558.01558.4_mfaini_C1912_035.c.01542.01542.4	399	636	237	2702.29	676.581	4	-3.9	0.52	0.78	42.13
ELAEQTLNNIKQFK-YIDNPKLR-a11-b6	pr|PROT02|DDX1	pr|PROT02|DDX1	intra-protein xl	mfaini_C1912_032.c.06668.06668.3_mfaini_C1912_032.c.06758.06758.3	307	317	10	2830.52	944.513	3	-2.5	0.51	0.49	41.87
VASPKLVMEEAPESYK-LRPIAVIKG-a5-b8	pr|PROT01|HSPC117	pr|PROT01|HSPC117	intra-protein xl	mfaini_C1912_032.c.06508.06508.5_mfaini_C1912_032.c.06452.06452.5	465	504	39	2880.61	577.129	5	1.2	0.36	0.4	41.86
FFEKYLR-HYKIEDR-a4-b3	pr|PROT04|CGI-99	pr|PROT04|CGI-99	intra-protein xl	mfaini_C1912_032.c.04109.04109.4_mfaini_C1912_032.c.04064.04064.4	62	41	21	2099.07	525.776	4	-4.6	0.73	0.34	41.53
APDGYIVKSQHSGNAQVTQTK-TTIKTGASVLNK-a8-b4	pr|PROT02|DDX1	pr|PROT02|DDX1	intra-protein xl	mfaini_C1912_032.c.02954.02954.4_mfaini_C1912_032.c.02764.02764.4	268	82	186	3597.88	900.478	4	-5.1	0.44	0.25	41.51
APDGYIVKSQHSGNAQVTQTK-KYIDNPKLR-a8-b7	pr|PROT02|DDX1	pr|PROT02|DDX1	intra-protein xl	mfaini_C1912_032.c.02348.02348.5_mfaini_C1912_032.c.02313.02313.5	268	317	49	3511.84	703.375	5	-1.6	0.45	0.49	41.4
APDGYIVKSQHSGNAQVTQTK-DQQEGKK-a8-b6	pr|PROT02|DDX1	pr|PROT02|DDX1	intra-protein xl	mfaini_C1912_033.c.01080.01080.4_mfaini_C1912_033.c.01058.01058.4	268	75	193	3197.59	800.405	4	-1.7	0.5	0.83	41.19
TTIKTGASVLNK-DQQEGKK-a4-b6	pr|PROT02|DDX1	pr|PROT02|DDX1	intra-protein xl	mfaini_C1912_034.c.01663.01663.3_mfaini_C1912_034.c.01638.01638.3	82	75	7	2201.2	734.74	3	3	0.49	0.48	41.15
TDDVHAKDNTRPGANSPEMWSEAIK-LGKSHIR-a7-b3	pr|PROT02|DDX1	pr|PROT02|DDX1	intra-protein xl	mfaini_C1912_033.c.02684.02684.5_mfaini_C1912_033.c.02695.02695.5	472	461	11	3715.83	744.174	5	-1.9	0.58	0.83	40.46
INEAIVAVQAIIADPKTDHR-LGKVGR-a16-b3	pr|PROT04|CGI-99	pr|PROT04|CGI-99	intra-protein xl	mfaini_C1912_032.c.06951.06951.5_mfaini_C1912_032.c.06965.06965.5	234	241	7	2939.64	588.937	5	-4.1	0.7	0.44	40.39
TGASVLNKWQMNPYDR-GKTTIK-a8-b2	pr|PROT02|DDX1	pr|PROT02|DDX1	intra-protein xl	mfaini_C1912_035.c.05109.05109.4_mfaini_C1912_035.c.05075.05075.4	90	78	12	2663.37	666.85	4	-1.8	0.41	0.36	40.32
TDDVHAKDNTRPGANSPEMWSEAIK-EVKEWHGCR-a7-b3	pr|PROT02|DDX1	pr|PROT02|DDX1	intra-protein xl	mfaini_C1912_034.c.03509.03509.5_mfaini_C1912_034.c.03458.03458.5	472	117	355	4105.89	822.186	5	-2.4	0.28	0.7	40.29
NVTDVVNTCHDAGISKK-INKNCWR-a16-b3	pr|PROT01|HSPC117	pr|PROT01|HSPC117	intra-protein xl	mfaini_C1912_034.c.03356.03356.3_mfaini_C1912_034.c.03328.03328.3	492	17	475	2984.45	995.824	3	-3.4	0.53	0.27	40.08
SQHSGNAQVTQTKFLPNAPK-YIDNPKLR-a13-b6	pr|PROT02|DDX1	pr|PROT02|DDX1	intra-protein xl	mfaini_C1912_032.c.03519.03519.5_mfaini_C1912_032.c.03486.03486.5	281	317	36	3307.72	662.552	5	-3.2	0.38	0.42	39.88
TDDVHAKDNTRPGANSPEMWSEAIK-GKGCYNTR-a7-b2	pr|PROT02|DDX1	pr|PROT02|DDX1	intra-protein xl	mfaini_C1912_033.c.02917.02917.5_mfaini_C1912_033.c.03054.03054.5	472	636	164	3860.78	773.163	5	-1.8	0.49	0.16	39.76
LDDLVSTGKLNLSQVR-TTIKTGASVLNK-a9-b4	pr|PROT02|DDX1	pr|PROT02|DDX1	intra-protein xl	mfaini_C1912_034.c.06308.06308.4_mfaini_C1912_034.c.06286.06286.4	358	82	276	3126.74	782.694	4	-1.5	0.43	0.71	39.44
APDGYIVKSQHSGNAQVTQTK-ATKGLXK-a8-b3	pr|PROT02|DDX1	pr|PROT02|DDX1	intra-protein xl	mfaini_C1912_033.c.01633.01633.5_mfaini_C1912_033.c.01625.01625.5	268	126	142	3129.61	626.929	5	-2.2	0.35	0.42	39.23
NHVGKPLLK-EDLSKIIR-a5-b5	pr|PROT03|FAM98B	pr|PROT03|FAM98B	intra-protein xl	mfaini_C1912_034.c.03596.03596.3_mfaini_C1912_034.c.03564.03564.3	192	280	88	2115.24	706.088	3	-0.7	0.35	0.72	39.12
APDGYIVKSQHSGNAQVTQTK-KGKTTIK-a8-b3	pr|PROT02|DDX1	pr|PROT02|DDX1	intra-protein xl	mfaini_C1912_033.c.00852.00852.4_mfaini_C1912_033.c.00833.00833.4	268	78	190	3140.68	786.178	4	-0.9	0.45	0.37	39.08
APDGYIVKSQHSGNAQVTQTK-ATKGLMK-a8-b3	pr|PROT02|DDX1	pr|PROT02|DDX1	intra-protein xl	mfaini_C1912_035.c.02070.02070.5_mfaini_C1912_035.c.02054.02054.5	268	126	142	3113.61	623.729	5	-3.8	0.37	0.53	39.03
TKIDCDNLEQYFIQQGGGPDK-EVKEWHGCR-a2-b3	pr|PROT02|DDX1	pr|PROT02|DDX1	intra-protein xl	mfaini_C1912_034.c.06164.06164.4_mfaini_C1912_034.c.06151.06151.4	516	117	399	3762.74	941.694	4	0.9	0.43	0.25	38.8
SQHSGNAQVTQTKFLPNAPK-KQNLER-a13-b1	pr|PROT02|DDX1	pr|PROT02|DDX1	intra-protein xl	mfaini_C1912_033.c.02050.02050.4_mfaini_C1912_033.c.02038.02038.4	281	555	274	3076.6	770.158	4	-1.1	0.37	0.48	38.4
ILKGEYAVR-VTYGQKR-a3-b6	pr|PROT02|DDX1	pr|PROT02|DDX1	intra-protein xl	mfaini_C1912_032.c.02327.02327.3_mfaini_C1912_032.c.02302.02302.3	493	693	200	2036.13	679.72	3	-3.2	0.5	0.32	38.34
SHNKQFDNYGEEFTMHDTIGCYLDIDK-EVKEWHGCR-a4-b3	pr|PROT02|DDX1	pr|PROT02|DDX1	intra-protein xl	mfaini_C1912_033.c.06316.06316.5_mfaini_C1912_033.c.06317.06317.5	177	117	60	4614.04	923.815	5	1	0.25	0.52	38.3
TDDVHAKDNTRPGANSPEXWSEAIK-LGKSHIR-a7-b3	pr|PROT02|DDX1	pr|PROT02|DDX1	intra-protein xl	mfaini_C1912_035.c.02477.02477.5_mfaini_C1912_035.c.02446.02446.5	472	461	11	3731.82	747.372	5	-2.5	0.38	0.84	38.04
SQHSGNAQVTQTKFLPNAPK-GKTTIK-a13-b2	pr|PROT02|DDX1	pr|PROT02|DDX1	intra-protein xl	mfaini_C1912_035.c.02062.02062.4_mfaini_C1912_035.c.02051.02051.4	281	78	203	2936.58	735.152	4	2.2	0.44	0.29	37.99
SQHSGNAQVTQTKFLPNAPK-LDDLVSTGKLNLSQVR-a13-b9	pr|PROT02|DDX1	pr|PROT02|DDX1	intra-protein xl	mfaini_C1912_033.c.05897.05897.5_mfaini_C1912_033.c.05852.05852.5	281	358	77	4047.14	810.435	5	-1.1	0.35	0.74	37.68
MHNQIPQVTSDGKR-EVKEWHGCR-a13-b3	pr|PROT02|DDX1	pr|PROT02|DDX1	intra-protein xl	mfaini_C1912_032.c.01975.01975.4_mfaini_C1912_032.c.01985.01985.4	399	117	282	2947.41	737.861	4	-2.5	0.44	0.51	37.67
APDGYIVKSQHSGNAQVTQTK-MHNQIPQVTSDGKR-a8-b13	pr|PROT02|DDX1	pr|PROT02|DDX1	intra-protein xl	mfaini_C1912_032.c.02231.02231.5_mfaini_C1912_032.c.02197.02197.5	268	399	131	3975.98	796.204	5	-0.8	0.47	0.61	37.57
VASPKLVXEEAPESYK-LRPIAVIKG-a5-b8	pr|PROT01|HSPC117	pr|PROT01|HSPC117	intra-protein xl	mfaini_C1912_032.c.05056.05056.4_mfaini_C1912_032.c.05033.05033.4	465	504	39	2896.59	725.156	4	-2	0.43	0.18	37.38
NLDFQDVLDKLADXGIAIR-VASPKLVMEEAPESYK-a10-b5	pr|PROT01|HSPC117	pr|PROT01|HSPC117	intra-protein xl	mfaini_C1912_032.c.11729.11729.4_mfaini_C1912_032.c.11728.11728.4	451	465	14	4077.05	1020.27	4	-4.1	0.36	0.63	37.24
LDDLVSTGKLNLSQVR-MHNQIPQVTSDGKR-a9-b13	pr|PROT02|DDX1	pr|PROT02|DDX1	intra-protein xl	mfaini_C1912_034.c.05275.05275.5_mfaini_C1912_034.c.05274.05274.5	358	399	41	3504.83	701.973	5	-2.7	0.46	0.45	37.07
MHNQIPQVTSDGKR-DQQEGKK-a13-b6	pr|PROT02|DDX1	pr|PROT02|DDX1	intra-protein xl	mfaini_C1912_035.c.00905.00905.4_mfaini_C1912_035.c.00800.00800.4	399	75	324	2579.27	645.826	4	-1.4	0.49	0.45	36.9
APDGYIVKSQHSGNAQVTQTK-TGASVLNKWQMNPYDR-a8-b8	pr|PROT02|DDX1	pr|PROT02|DDX1	intra-protein xl	mfaini_C1912_032.c.05396.05396.4_mfaini_C1912_032.c.05343.05343.4	268	90	178	4245.08	1062.28	4	-3.3	0.47	0.38	36.85
TTIKTGASVLNK-ATKGLMK-a4-b3	pr|PROT02|DDX1	pr|PROT02|DDX1	intra-protein xl	mfaini_C1912_033.c.02599.02599.3_mfaini_C1912_033.c.02596.02596.3	82	126	44	2117.21	706.745	3	-1.1	0.46	0	36.73
YKDLVPDNSK-HYKIEDR-a2-b3	pr|PROT04|CGI-99	pr|PROT04|CGI-99	intra-protein xl	mfaini_C1912_035.c.02484.02484.3_mfaini_C1912_035.c.02459.02459.3	100	41	59	2275.14	759.388	3	-3.9	0.43	0.56	36.68
EVKEWHGCR-KQNLER-a3-b1	pr|PROT02|DDX1	pr|PROT02|DDX1	intra-protein xl	mfaini_C1912_035.c.00950.00950.3_mfaini_C1912_035.c.00921.00921.3	117	555	438	2124.05	709.024	3	-2.2	0.42	0.87	36.63
APDGYIVKSQHSGNAQVTQTK-YIDNPKLR-a8-b6	pr|PROT02|DDX1	pr|PROT02|DDX1	intra-protein xl	mfaini_C1912_032.c.02822.02822.4_mfaini_C1912_032.c.02768.02768.4	268	317	49	3383.74	846.943	4	-2.3	0.53	0.3	36.6
ALIVEPSRELAEQTLNNIKQFK-YIDNPKLR-a19-b6	pr|PROT02|DDX1	pr|PROT02|DDX1	intra-protein xl	mfaini_C1912_035.c.08098.08098.4_mfaini_C1912_035.c.08076.08076.4	307	317	10	3696.02	925.013	4	-1.2	0.63	0.31	36.59
ELAEQTLNNIKQFK-KYIDNPKLR-a11-b7	pr|PROT02|DDX1	pr|PROT02|DDX1	intra-protein xl	mfaini_C1912_035.c.05592.05592.3_mfaini_C1912_035.c.05569.05569.3	307	317	10	2958.61	987.211	3	-2.4	0.44	0.73	36.58
ELAEQTLNNIKQFK-KYIDNPK-a11-b1	pr|PROT02|DDX1	pr|PROT02|DDX1	intra-protein xl	mfaini_C1912_032.c.05981.05981.4_mfaini_C1912_032.c.05957.05957.4	307	311	4	2689.43	673.366	4	-0.7	0.44	0.44	36.46
TDDVHAKDNTRPGANSPEXWSEAIK-GKGCYNTR-a7-b2	pr|PROT02|DDX1	pr|PROT02|DDX1	intra-protein xl	mfaini_C1912_034.c.02663.02663.5_mfaini_C1912_034.c.02641.02641.5	472	636	164	3876.78	776.364	5	0	0.35	0.38	36.42
SQHSGNAQVTQTKFLPNAPK-MHNQIPQVTSDGKR-a13-b13	pr|PROT02|DDX1	pr|PROT02|DDX1	intra-protein xl	mfaini_C1912_033.c.02706.02706.5_mfaini_C1912_033.c.02660.02660.5	281	399	118	3899.96	780.999	5	-3.6	0.43	0.4	36.35
GEDSVPDTVHHVVVPVNPKTDR-MGLAISLVATEKEK-a19-b12	pr|PROT02|DDX1	pr|PROT02|DDX1	intra-protein xl	mfaini_C1912_035.c.05843.05843.5_mfaini_C1912_035.c.05822.05822.5	451	623	172	4023.08	805.624	5	-4	0.41	0.59	36.19
VQKNHVGKPLLK-EDLSKIIR-a3-b5	pr|PROT03|FAM98B	pr|PROT03|FAM98B	intra-protein xl	mfaini_C1912_033.c.02465.02465.3_mfaini_C1912_033.c.02325.02325.3	187	280	93	2470.46	824.494	3	-1.9	0.44	0.83	36.15
VKTDDIAR-IYQPKR-a2-b5	pr|PROT03|FAM98B	pr|PROT03|FAM98B	intra-protein xl	mfaini_C1912_032.c.01451.01451.4_mfaini_C1912_032.c.01399.01399.4	245	256	11	1858.03	465.514	4	-3.1	0.41	0.39	35.95
TADNATKNAEPLINLDVNNPDFK-YKDLVPDNSK-a7-b2	pr|PROT04|CGI-99	pr|PROT04|CGI-99	intra-protein xl	mfaini_C1912_033.c.06758.06758.4_mfaini_C1912_033.c.06799.06799.4	115	100	15	3828.89	958.231	4	-3.5	0.43	0.33	35.94
FPPKDGFVALSK-GHVKFSK-a4-b4	pr|PROT02|DDX1	pr|PROT02|DDX1	intra-protein xl	mfaini_C1912_033.c.03712.03712.4_mfaini_C1912_033.c.03557.03557.4	252	204	48	2244.23	562.064	4	-2.3	0.55	0.7	35.9
SQHSGNAQVTQTKFLPNAPK-DQQEGKK-a13-b6	pr|PROT02|DDX1	pr|PROT02|DDX1	intra-protein xl	mfaini_C1912_032.c.01995.01995.4_mfaini_C1912_032.c.01832.01832.4	281	75	206	3121.57	781.4	4	-3	0.39	0.37	35.85
NQALFPACVLKNAELK-FGFGFGGTGKK-a11-b10	pr|PROT02|DDX1	pr|PROT02|DDX1	intra-protein xl	mfaini_C1912_032.c.08593.08593.4_mfaini_C1912_032.c.08780.08780.4	234	172	62	3054.59	764.656	4	-3.1	0.66	0.88	35.73
TKIDCDNLEQYFIQQGGGPDK-KYIDNPK-a2-b1	pr|PROT02|DDX1	pr|PROT02|DDX1	intra-protein xl	mfaini_C1912_033.c.06582.06582.4_mfaini_C1912_033.c.06547.06547.4	516	311	205	3439.66	860.922	4	-1.3	0.36	0.32	35.63
VPVDEFDGKVTYGQK-EHKMDQAIIFCR-a9-b3	pr|PROT02|DDX1	pr|PROT02|DDX1	intra-protein xl	mfaini_C1912_032.c.06032.06032.4_mfaini_C1912_032.c.06012.06012.4	687	505	182	3365.62	842.414	4	-5.3	0.25	0.37	35.61
TKIDCDNLEQYFIQQGGGPDK-LDDLVSTGKLNLSQVR-a2-b9	pr|PROT02|DDX1	pr|PROT02|DDX1	intra-protein xl	mfaini_C1912_032.c.09455.09455.4_mfaini_C1912_032.c.09425.09425.4	516	358	158	4320.14	1081.04	4	-3.7	0.26	0.35	35.49
YALSPKTTITMAHLLAAR-IYQPKR-a6-b5	pr|PROT03|FAM98B	pr|PROT03|FAM98B	intra-protein xl	mfaini_C1912_033.c.06063.06063.4_mfaini_C1912_033.c.06076.06076.4	263	256	7	2898.6	725.658	4	-4.4	0.61	0.48	35.44
LTALDYHNPAGFNCKDETEFR-LGKVGR-a15-b3	pr|PROT04|CGI-99	pr|PROT04|CGI-99	intra-protein xl	mfaini_C1912_033.c.04592.04592.4_mfaini_C1912_033.c.04578.04578.4	20	241	221	3263.6	816.907	4	-1.8	0.45	0.43	35.35
DGFVALSKAPDGYIVK-GKGCYNTR-a8-b2	pr|PROT02|DDX1	pr|PROT02|DDX1	intra-protein xl	mfaini_C1912_033.c.05317.05317.3_mfaini_C1912_033.c.05304.05304.3	260	636	376	2771.38	924.802	3	-4.9	0.49	0.29	35.24
EVKEWHGCR-GKGCYNTR-a3-b2	pr|PROT02|DDX1	pr|PROT02|DDX1	intra-protein xl	mfaini_C1912_035.c.00967.00967.4_mfaini_C1912_035.c.00949.00949.4	117	636	519	2292.04	574.019	4	-3.9	0.31	0.78	35.09
APDGYIVKSQHSGNAQVTQTK-GKGCYNTR-a8-b2	pr|PROT02|DDX1	pr|PROT02|DDX1	intra-protein xl	mfaini_C1912_033.c.01603.01603.4_mfaini_C1912_033.c.01591.01591.4	268	636	368	3320.62	831.162	4	-1.4	0.4	0.27	35
SQHSGNAQVTQTKFLPNAPK-EVKEWHGCR-a13-b3	pr|PROT02|DDX1	pr|PROT02|DDX1	intra-protein xl	mfaini_C1912_032.c.02616.02616.4_mfaini_C1912_032.c.02596.02596.4	281	117	164	3489.71	873.436	4	-2	0.34	0.25	34.9
NLDFQDVLDKLADXGIAIR-LRPIAVIKG-a10-b8	pr|PROT01|HSPC117	pr|PROT01|HSPC117	intra-protein xl	mfaini_C1912_032.c.11684.11684.4_mfaini_C1912_032.c.11678.11678.4	451	504	53	3265.8	817.459	4	-2	0.34	0.69	34.89
NLDFQDVLDKLADMGIAIR-VASPKLVMEEAPESYK-a10-b5	pr|PROT01|HSPC117	pr|PROT01|HSPC117	intra-protein xl	mfaini_C1912_033.c.12738.12738.4_mfaini_C1912_033.c.12728.12728.4	451	465	14	4061.08	1016.28	4	1.9	0.45	0.41	34.65
LDDLVSTGKLNLSQVR-KQNLER-a9-b1	pr|PROT02|DDX1	pr|PROT02|DDX1	intra-protein xl	mfaini_C1912_035.c.05284.05284.4_mfaini_C1912_035.c.05252.05252.4	358	555	197	2681.46	671.374	4	-2.8	0.44	0.89	34.61
EVKEWHGCR-LGKSHIR-a3-b3	pr|PROT02|DDX1	pr|PROT02|DDX1	intra-protein xl	mfaini_C1912_033.c.00812.00812.3_mfaini_C1912_033.c.00790.00790.3	117	461	344	2147.1	716.708	3	-1.9	0.36	0.89	34.56
NHVGKPLLKMDLNSEQAEQLER-EDLSKIIR-a9-b5	pr|PROT03|FAM98B	pr|PROT03|FAM98B	intra-protein xl	mfaini_C1912_032.c.05505.05505.4_mfaini_C1912_032.c.05473.05473.4	196	280	84	3658.93	915.74	4	-1.9	0.31	0.38	34.54
IASPEGQDYLKGMAAAGNYAWVNR-MLQADPNKVSAR-a11-b8	pr|PROT01|HSPC117	pr|PROT01|HSPC117	intra-protein xl	mfaini_C1912_034.c.07331.07331.5_mfaini_C1912_034.c.07343.07343.5	308	206	102	4047.99	810.605	5	-1.4	0.31	0.43	34.44
DGFVALSKAPDGYIVK-TGASVLNKWQMNPYDR-a8-b8	pr|PROT02|DDX1	pr|PROT02|DDX1	intra-protein xl	mfaini_C1912_032.c.09090.09090.4_mfaini_C1912_032.c.09059.09059.4	260	90	170	3695.86	924.972	4	-2.3	0.44	0.74	34.17
LDDLVSTGKLNLSQVR-ELAEQTLNNIKQFK-a9-b11	pr|PROT02|DDX1	pr|PROT02|DDX1	intra-protein xl	mfaini_C1912_033.c.08503.08503.4_mfaini_C1912_033.c.08479.08479.4	358	307	51	3569.93	893.489	4	-1.3	0.32	0.48	34.14
MHNQIPQVTSDGKR-KYIDNPK-a13-b1	pr|PROT02|DDX1	pr|PROT02|DDX1	intra-protein xl	mfaini_C1912_032.c.02012.02012.4_mfaini_C1912_032.c.01993.01993.4	399	311	88	2624.33	657.091	4	-1.9	0.51	0.38	34.02
DGFVALSKAPDGYIVK-DQQEGKK-a8-b6	pr|PROT02|DDX1	pr|PROT02|DDX1	intra-protein xl	mfaini_C1912_034.c.05444.05444.3_mfaini_C1912_034.c.05426.05426.3	260	75	185	2648.37	883.798	3	-0.1	0.47	0.39	34.01
ALIVEPSRELAEQTLNNIKQFK-KYIDNPKLR-a19-b7	pr|PROT02|DDX1	pr|PROT02|DDX1	intra-protein xl	mfaini_C1912_035.c.07359.07359.4_mfaini_C1912_035.c.07318.07318.4	307	317	10	3824.12	957.039	4	1.4	0.53	0.27	33.8
GLGHQVATDALVAMEKAMKR-RDKIIVNDR-a16-b3	pr|PROT01|HSPC117	pr|PROT01|HSPC117	intra-protein xl	mfaini_C1912_032.c.08926.08926.5_mfaini_C1912_032.c.09240.09240.5	279	285	6	3390.81	679.17	5	-3.4	0.57	0.43	33.76
EKTACAINK-IYQPKR-a2-b5	pr|PROT03|FAM98B	pr|PROT03|FAM98B	intra-protein xl	mfaini_C1912_033.c.00906.00906.4_mfaini_C1912_033.c.00886.00886.4	292	256	36	1975.05	494.771	4	-1.7	0.29	0.83	33.54
ELAEQTLNNIKQFK-EVKEWHGCR-a11-b3	pr|PROT02|DDX1	pr|PROT02|DDX1	intra-protein xl	mfaini_C1912_033.c.05349.05349.4_mfaini_C1912_033.c.05315.05315.4	307	117	190	3012.51	754.135	4	-1.5	0.3	0.33	33.48
NIHSSDWPKFFEK-DVNCPFKIQDR-a9-b7	pr|PROT04|CGI-99	pr|PROT04|CGI-99	intra-protein xl	mfaini_C1912_032.c.06688.06688.5_mfaini_C1912_032.c.06684.06684.5	58	72	14	3162.51	633.51	5	-4.3	0.48	0.48	33.37
LTQDAVAKANQTK-HYKIEDR-a8-b3	pr|PROT04|CGI-99	pr|PROT04|CGI-99	intra-protein xl	mfaini_C1912_032.c.01679.01679.4_mfaini_C1912_032.c.01655.01655.4	171	41	130	2484.29	622.081	4	-2.5	0.49	0.84	33.23
KGHQFSCVCLHGDR-GLMKGK-a1-b4	pr|PROT02|DDX1	pr|PROT02|DDX1	intra-protein xl	mfaini_C1912_033.c.01537.01537.4_mfaini_C1912_033.c.01504.01504.4	536	130	406	2470.2	618.556	4	-3.5	0.24	0.73	33.13
YIDNPKLR-GLMKGK-a6-b4	pr|PROT02|DDX1	pr|PROT02|DDX1	intra-protein xl	mfaini_C1912_035.c.02541.02541.4_mfaini_C1912_035.c.02504.02504.4	317	130	187	1787.99	448.006	4	-1.6	0.54	0.75	33.12
FNFGEEEFKFPPKDGFVALSK-NGKDLGLAFEIPPHMK-a9-b3	pr|PROT02|DDX1	pr|PROT02|DDX1	intra-protein xl	mfaini_C1912_033.c.09037.09037.4_mfaini_C1912_033.c.08994.08994.4	248	210	38	4336.18	1085.05	4	-1.9	0.25	0.89	33.1
APDGYIVKSQHSGNAQVTQTK-KQNLER-a8-b1	pr|PROT02|DDX1	pr|PROT02|DDX1	intra-protein xl	mfaini_C1912_033.c.01590.01590.4_mfaini_C1912_033.c.01602.01602.4	268	555	287	3152.62	789.162	4	-1.1	0.39	0.4	33.02
TADNATKNAEPLINLDVNNPDFK-LEYGDNAEKYK-a7-b9	pr|PROT04|CGI-99	pr|PROT04|CGI-99	intra-protein xl	mfaini_C1912_035.c.06351.06351.4_mfaini_C1912_035.c.06338.06338.4	115	98	17	3979.91	995.986	4	-5.4	0.42	0.32	32.96
MHNQIPQVTSDGKR-TTIKTGASVLNK-a13-b4	pr|PROT02|DDX1	pr|PROT02|DDX1	intra-protein xl	mfaini_C1912_033.c.02653.02653.5_mfaini_C1912_033.c.02623.02623.5	399	82	317	2979.58	596.924	5	-0.7	0.4	0.46	32.79
SQHSGNAQVTQTKFLPNAPK-TGASVLNKWQMNPYDR-a13-b8	pr|PROT02|DDX1	pr|PROT02|DDX1	intra-protein xl	mfaini_C1912_032.c.06103.06103.5_mfaini_C1912_032.c.06046.06046.5	281	90	191	4169.06	834.82	5	-3.4	0.3	0.8	32.68
TDDVHAKDNTRPGANSPEMWSEAIK-ILKGEYAVR-a7-b3	pr|PROT02|DDX1	pr|PROT02|DDX1	intra-protein xl	mfaini_C1912_035.c.04429.04429.4_mfaini_C1912_035.c.04404.04404.4	472	493	21	3953.96	989.498	4	0.2	0.5	0.17	32.58
KGHQFSCVCLHGDRKPHER-GKGCYNTR-a15-b2	pr|PROT02|DDX1	pr|PROT02|DDX1	intra-protein xl	mfaini_C1912_032.c.00579.00579.5_mfaini_C1912_032.c.00580.00580.5	550	636	86	3439.61	688.93	5	-1.9	0.36	0.76	32.52
LEYGDNAEKYK-HYKIEDR-a9-b3	pr|PROT04|CGI-99	pr|PROT04|CGI-99	intra-protein xl	mfaini_C1912_035.c.02158.02158.3_mfaini_C1912_035.c.02132.02132.3	98	41	57	2426.17	809.73	3	-4.1	0.46	0	32.51
ILKGEYAVR-KQNLER-a3-b1	pr|PROT02|DDX1	pr|PROT02|DDX1	intra-protein xl	mfaini_C1912_033.c.02017.02017.3_mfaini_C1912_033.c.02008.02008.3	493	555	62	1972.1	658.376	3	-3.4	0.5	0	32.34
YIDNPKLR-DQQEGKK-a6-b6	pr|PROT02|DDX1	pr|PROT02|DDX1	intra-protein xl	mfaini_C1912_035.c.01456.01456.3_mfaini_C1912_035.c.01371.01371.3	317	75	242	1987.03	663.352	3	-2.5	0.42	0.38	32.33
GHQFSCVCLHGDRKPHER-GKGCYNTR-a14-b2	pr|PROT02|DDX1	pr|PROT02|DDX1	intra-protein xl	mfaini_C1912_032.c.00662.00662.5_mfaini_C1912_032.c.00673.00673.5	550	636	86	3311.51	663.31	5	-3.5	0.33	0.28	32.26
ILKGEYAVR-AIKEHK-a3-b3	pr|PROT02|DDX1	pr|PROT02|DDX1	intra-protein xl	mfaini_C1912_033.c.01037.01037.3_mfaini_C1912_033.c.01005.01005.3	493	502	9	1910.1	637.706	3	-1.6	0.47	0	32.24
MHNQIPQVTSDGKR-YIDNPKLR-a13-b6	pr|PROT02|DDX1	pr|PROT02|DDX1	intra-protein xl	mfaini_C1912_035.c.02649.02649.4_mfaini_C1912_035.c.02628.02628.4	399	317	82	2765.43	692.364	4	-0.7	0.56	0.5	32.03
DVNCPFKIQDR-FFEKYLR-a7-b4	pr|PROT04|CGI-99	pr|PROT04|CGI-99	intra-protein xl	mfaini_C1912_033.c.06655.06655.3_mfaini_C1912_033.c.06623.06623.3	72	62	10	2530.26	844.428	3	-2.9	0.46	0.54	31.82
ELAEQTLNNIKQFK-MHNQIPQVTSDGKR-a11-b13	pr|PROT02|DDX1	pr|PROT02|DDX1	intra-protein xl	mfaini_C1912_035.c.05354.05354.4_mfaini_C1912_035.c.05346.05346.4	307	399	92	3422.76	856.697	4	-1.3	0.36	0.89	31.66
MHNQIPQVTSDGKR-VTYGQKR-a13-b6	pr|PROT02|DDX1	pr|PROT02|DDX1	intra-protein xl	mfaini_C1912_032.c.01705.01705.4_mfaini_C1912_032.c.01691.01691.4	399	693	294	2598.33	650.59	4	-2.1	0.59	0.57	31.55
NQALFPACVLKNAELK-KQNLER-a11-b1	pr|PROT02|DDX1	pr|PROT02|DDX1	intra-protein xl	mfaini_C1912_032.c.05770.05770.4_mfaini_C1912_032.c.05939.05939.4	234	555	321	2739.47	685.875	4	-2.7	0.72	0.89	31.55
SHNKQFDNYGEEFTMHDTIGCYLDIDK-FGFGFGGTGKK-a4-b10	pr|PROT02|DDX1	pr|PROT02|DDX1	intra-protein xl	mfaini_C1912_032.c.08386.08386.5_mfaini_C1912_032.c.08384.08384.5	177	172	5	4516.04	904.215	5	-0.8	0.57	0.22	31.53
ELAEQTLNNIKQFK-GKGCYNTR-a11-b2	pr|PROT02|DDX1	pr|PROT02|DDX1	intra-protein xl	mfaini_C1912_032.c.05363.05363.4_mfaini_C1912_032.c.05345.05345.4	307	636	329	2767.39	692.855	4	-3.1	0.4	0.46	31.34
FNFGEEEFKFPPKDGFVALSK-GHVKFSK-a13-b4	pr|PROT02|DDX1	pr|PROT02|DDX1	intra-protein xl	mfaini_C1912_033.c.06700.06700.4_mfaini_C1912_033.c.06689.06689.4	252	204	48	3371.72	843.937	4	-1.9	0.63	0.82	31.31
NLDFQDVLDKLADMGIAIR-VASPKLVXEEAPESYK-a10-b5	pr|PROT01|HSPC117	pr|PROT01|HSPC117	intra-protein xl	mfaini_C1912_033.c.12299.12299.4_mfaini_C1912_033.c.12279.12279.4	451	465	14	4077.06	1020.27	4	-1.7	0.32	0.66	30.97
KYIDNPKLR-DQQEGKK-a7-b6	pr|PROT02|DDX1	pr|PROT02|DDX1	intra-protein xl	mfaini_C1912_035.c.00804.00804.3_mfaini_C1912_035.c.00787.00787.3	317	75	242	2115.13	706.05	3	-3	0.5	0.38	30.9
IASPEGQDYLKGMAAAGNYAWVNR-XLQADPNKVSAR-a11-b8	pr|PROT01|HSPC117	pr|PROT01|HSPC117	intra-protein xl	mfaini_C1912_032.c.07384.07384.4_mfaini_C1912_032.c.07420.07420.4	308	206	102	4063.98	1017	4	-3	0.35	0.73	30.84
ELAEQTLNNIKQFKK-YIDNPKLR-a11-b6	pr|PROT02|DDX1	pr|PROT02|DDX1	intra-protein xl	mfaini_C1912_035.c.05392.05392.3_mfaini_C1912_035.c.05361.05361.3	307	317	10	2958.61	987.212	3	-1.9	0.4	0.33	30.77
EHKMDQAIIFCR-VTYGQKR-a3-b6	pr|PROT02|DDX1	pr|PROT02|DDX1	intra-protein xl	mfaini_C1912_033.c.03182.03182.4_mfaini_C1912_033.c.03148.03148.4	505	693	188	2535.27	634.825	4	-1.6	0.51	0.48	30.73
FNFGEEEFKFPPKDGFVALSK-NGKDLGLAFEIPPHMK-a13-b3	pr|PROT02|DDX1	pr|PROT02|DDX1	intra-protein xl	mfaini_C1912_033.c.08996.08996.5_mfaini_C1912_033.c.08974.08974.5	252	210	42	4336.2	868.248	5	2.1	0.42	0.63	30.71
GLGHQVATDALVAMEKAMKR-RDKIIVNDR-a19-b3	pr|PROT01|HSPC117	pr|PROT01|HSPC117	intra-protein xl	mfaini_C1912_034.c.08389.08389.5_mfaini_C1912_034.c.08704.08704.5	282	285	3	3390.81	679.171	5	-2.6	0.47	0.5	30.67
SQHSGNAQVTQTKFLPNAPK-ATKGLMK-a13-b3	pr|PROT02|DDX1	pr|PROT02|DDX1	intra-protein xl	mfaini_C1912_033.c.02693.02693.3_mfaini_C1912_033.c.02671.02671.3	281	126	155	3037.59	1013.54	3	-2.3	0.41	0.3	30.53
KYIDNPKLR-GLMKGK-a7-b4	pr|PROT02|DDX1	pr|PROT02|DDX1	intra-protein xl	mfaini_C1912_032.c.01960.01960.4_mfaini_C1912_032.c.01954.01954.4	317	130	187	1916.09	480.03	4	-1.7	0.7	0.67	30.4
FNFGEEEFKFPPKDGFVALSK-GHVKFSK-a9-b4	pr|PROT02|DDX1	pr|PROT02|DDX1	intra-protein xl	mfaini_C1912_033.c.06679.06679.5_mfaini_C1912_033.c.06666.06666.5	248	204	44	3371.71	675.351	5	-2.7	0.6	0.9	30.24
KYIDNPK-KQNLER-a1-b1	pr|PROT02|DDX1	pr|PROT02|DDX1	intra-protein xl	mfaini_C1912_032.c.00974.00974.3_mfaini_C1912_032.c.00953.00953.3	311	555	244	1800.97	601.33	3	-4.1	0.26	0.46	30.04
RNLDFQDVLDKLADMGIAIR-VASPKLVMEEAPESYK-a11-b5	pr|PROT01|HSPC117	pr|PROT01|HSPC117	intra-protein xl	mfaini_C1912_032.c.12214.12214.5_mfaini_C1912_032.c.12247.12247.5	451	465	14	4217.16	844.44	5	-3.3	0.27	0.69	29.98
STTSDIPHMLNQVESKVK-DILSKVQK-a16-b5	pr|PROT03|FAM98B	pr|PROT03|FAM98B	intra-protein xl	mfaini_C1912_033.c.07975.07975.5_mfaini_C1912_033.c.07887.07887.5	177	184	7	3080.63	617.134	5	-3.7	0.34	0.87	29.92
IDCDNLEQYFIQQGGGPDKK-ILKGEYAVR-a19-b3	pr|PROT02|DDX1	pr|PROT02|DDX1	intra-protein xl	mfaini_C1912_032.c.07387.07387.4_mfaini_C1912_032.c.07359.07359.4	535	493	42	3509.74	878.444	4	-1.9	0.29	0.4	29.85
TGAFSIPVIQIVYETLKDQQEGK-MHNQIPQVTSDGKR-a17-b13	pr|PROT02|DDX1	pr|PROT02|DDX1	intra-protein xl	mfaini_C1912_033.c.10324.10324.5_mfaini_C1912_033.c.10300.10300.5	69	399	330	4311.23	863.254	5	1.9	0.26	0.48	29.82
MHNQIPQVTSDGKR-MHNQIPQVTSDGKR-a13-b13	pr|PROT02|DDX1	pr|PROT02|DDX1	intra-protein xl	mfaini_C1912_032.c.02134.02134.4_mfaini_C1912_032.c.02122.02122.4	399	399	0	3357.66	840.423	4	-2	0.37	0.32	29.5
DLVPDNSKTADNATK-LEYGDNAEKYK-a8-b9	pr|PROT04|CGI-99	pr|PROT04|CGI-99	intra-protein xl	mfaini_C1912_033.c.03367.03367.3_mfaini_C1912_033.c.03315.03315.3	108	98	10	3054.46	1019.16	3	-2.4	0.64	0	29.32
TKIDCDNLEQYFIQQGGGPDK-MHNQIPQVTSDGKR-a2-b13	pr|PROT02|DDX1	pr|PROT02|DDX1	intra-protein xl	mfaini_C1912_033.c.06028.06028.5_mfaini_C1912_033.c.05991.05991.5	516	399	117	4172.98	835.604	5	-2.5	0.47	0.27	29.18
APDGYIVKSQHSGNAQVTQTK-LDDLVSTGKLNLSQVR-a8-b9	pr|PROT02|DDX1	pr|PROT02|DDX1	intra-protein xl	mfaini_C1912_034.c.05392.05392.4_mfaini_C1912_034.c.05337.05337.4	268	358	90	4123.15	1031.8	4	-0.2	0.41	0.47	29.16
GLMKGK-KQNLER-a4-b1	pr|PROT02|DDX1	pr|PROT02|DDX1	intra-protein xl	mfaini_C1912_033.c.00784.00784.3_mfaini_C1912_033.c.00772.00772.3	130	555	425	1556.87	519.964	3	-1.3	0.26	0.56	29.13
ELAEQTLNNIKQFK-GLMKGK-a11-b4	pr|PROT02|DDX1	pr|PROT02|DDX1	intra-protein xl	mfaini_C1912_033.c.05876.05876.4_mfaini_C1912_033.c.05832.05832.4	307	130	177	2445.33	612.34	4	-1.3	0.26	0.86	28.49
EKTACAINK-EDLSKIIR-a2-b5	pr|PROT03|FAM98B	pr|PROT03|FAM98B	intra-protein xl	mfaini_C1912_035.c.03215.03215.3_mfaini_C1912_035.c.03198.03198.3	292	280	12	2144.15	715.726	3	1.1	0.18	0.4	28.06
DGFVALSKAPDGYIVK-KQNLER-a8-b1	pr|PROT02|DDX1	pr|PROT02|DDX1	intra-protein xl	mfaini_C1912_034.c.05481.05481.3_mfaini_C1912_034.c.05469.05469.3	260	555	295	2603.4	868.807	3	0.2	0.32	0.29	27.8
LDDLVSTGKLNLSQVR-ATKGLMK-a9-b3	pr|PROT02|DDX1	pr|PROT02|DDX1	intra-protein xl	mfaini_C1912_035.c.05954.05954.3_mfaini_C1912_035.c.05943.05943.3	358	126	232	2642.46	881.829	3	-2.1	0.44	0.42	27.69
DLVPDNSKTADNATK-HYKIEDR-a8-b3	pr|PROT04|CGI-99	pr|PROT04|CGI-99	intra-protein xl	mfaini_C1912_033.c.02208.02208.3_mfaini_C1912_033.c.02181.02181.3	108	41	67	2685.32	896.115	3	-0.7	0.64	0.42	27.61
EVKEWHGCR-VTYGQKR-a3-b6	pr|PROT02|DDX1	pr|PROT02|DDX1	intra-protein xl	mfaini_C1912_033.c.01157.01157.4_mfaini_C1912_033.c.01125.01125.4	117	693	576	2188.08	548.028	4	-1.9	0.5	0.63	27.49
ELAEQTLNNIKQFK-KQNLER-a11-b1	pr|PROT02|DDX1	pr|PROT02|DDX1	intra-protein xl	mfaini_C1912_032.c.05414.05414.3_mfaini_C1912_032.c.05383.05383.3	307	555	248	2599.39	867.472	3	-2	0.35	0.39	27.43
NFIVWLEDQKIR-HYKIEDR-a10-b3	pr|PROT04|CGI-99	pr|PROT04|CGI-99	intra-protein xl	mfaini_C1912_035.c.07536.07536.3_mfaini_C1912_035.c.07514.07514.3	36	41	5	2657.39	886.806	3	-1.3	0.42	0.77	26.97
MHNQIPQVTSDGKR-KQNLER-a13-b1	pr|PROT02|DDX1	pr|PROT02|DDX1	intra-protein xl	mfaini_C1912_032.c.01237.01237.4_mfaini_C1912_032.c.01290.01290.4	399	555	156	2534.3	634.582	4	-2.3	0.27	0.89	26.49
DGFVALSKAPDGYIVK-TTIKTGASVLNK-a8-b4	pr|PROT02|DDX1	pr|PROT02|DDX1	intra-protein xl	mfaini_C1912_033.c.06514.06514.3_mfaini_C1912_033.c.06474.06474.3	260	82	178	3048.67	1017.23	3	-0.8	0.3	0.77	25.63
LGKSHIR-VTYGQKR-a3-b6	pr|PROT02|DDX1	pr|PROT02|DDX1	intra-protein xl	mfaini_C1912_035.c.00579.00579.3_mfaini_C1912_035.c.00591.00591.3	461	693	232	1798.01	600.345	3	-4.7	0.51	0.83	25.56
KYIDNPKLR-DQQEGKK-a1-b6	pr|PROT02|DDX1	pr|PROT02|DDX1	intra-protein xl	mfaini_C1912_034.c.00849.00849.4_mfaini_C1912_034.c.00840.00840.4	311	75	236	2115.13	529.79	4	-1.2	0.27	0.82	24.99
TDDVHAKDNTRPGANSPEMWSEAIK-DGFVALSKAPDGYIVK-a7-b8	pr|PROT02|DDX1	pr|PROT02|DDX1	intra-protein xl	mfaini_C1912_032.c.06780.06780.5_mfaini_C1912_032.c.06768.06768.5	472	260	212	4585.23	918.053	5	-4.1	0.24	0.51	23.52
GEDSVPDTVHHVVVPVNPKTDR-XGLAISLVATEKEK-a19-b12	pr|PROT02|DDX1	pr|PROT02|DDX1	intra-protein xl	mfaini_C1912_032.c.05538.05538.4_mfaini_C1912_032.c.05506.05506.4	451	623	172	4039.1	1010.78	4	0.7	0.61	0.4	23.47
NFIVWLEDQKIR-LEYGDNAEKYK-a10-b9	pr|PROT04|CGI-99	pr|PROT04|CGI-99	intra-protein xl	mfaini_C1912_033.c.08719.08719.3_mfaini_C1912_033.c.08688.08688.3	36	98	62	3026.53	1009.85	3	-2.7	0.33	0.46	23.43
IASPEGQDYLKGMAAAGNYAWVNR-DKIIVNDR-a11-b2	pr|PROT01|HSPC117	pr|PROT01|HSPC117	intra-protein xl	mfaini_C1912_033.c.07959.07959.4_mfaini_C1912_033.c.07934.07934.4	308	285	23	3690.85	923.721	4	1.2	0.19	0.68	23.25
SQHSGNAQVTQTKFLPNAPK-DGFVALSKAPDGYIVK-a13-b8	pr|PROT02|DDX1	pr|PROT02|DDX1	intra-protein xl	mfaini_C1912_033.c.06124.06124.4_mfaini_C1912_033.c.06091.06091.4	281	260	21	3969.07	993.275	4	1.2	0.27	0.33	23.23
EGYAWAEDKEHCEEYGR-MLQADPNKVSAR-a9-b8	pr|PROT01|HSPC117	pr|PROT01|HSPC117	intra-protein xl	mfaini_C1912_032.c.04480.04480.4_mfaini_C1912_032.c.04469.04469.4	190	206	16	3594.61	899.66	4	-1.9	0.45	0.85	22.49
QAFAKVFNTTPDDLDLHVIYDVSHNIAK-EQLAQAMFDHIPVGVGSKGVIPMNAK-a5-b18	pr|PROT01|HSPC117	pr|PROT01|HSPC117	intra-protein xl	mfaini_C1912_034.c.09782.09782.4_mfaini_C1912_034.c.09757.09757.4	334	158	176	6045.1	1512.28	4	2.7	0.19	0.76	21.71
RNLDFQDVLDKLADMGIAIR-LRPIAVIKG-a11-b8	pr|PROT01|HSPC117	pr|PROT01|HSPC117	intra-protein xl	mfaini_C1912_033.c.11873.11873.3_mfaini_C1912_033.c.11841.11841.3	451	504	53	3405.92	1136.31	3	-0.1	0.26	0	21.12
KGHQFSCVCLHGDR-VTYGQKR-a1-b6	pr|PROT02|DDX1	pr|PROT02|DDX1	intra-protein xl	mfaini_C1912_032.c.01193.01193.5_mfaini_C1912_032.c.01152.01152.5	536	693	157	2688.3	538.667	5	-1.9	0.68	0.32	20.48
QAFAKVFNTTPDDLDLHVIYDVSHNIAK-IASPEGQDYLKGMAAAGNYAWVNR-a5-b11	pr|PROT01|HSPC117	pr|PROT01|HSPC117	intra-protein xl	mfaini_C1912_032.c.10519.10519.5_mfaini_C1912_032.c.10513.10513.5	334	308	26	5889.89	1178.99	5	-2.7	0.21	0.68	20.36
GPLLEEQALTKAAEGGLSSPEFSELCIWLGSQIK-KKEDCLK-a11-b2	pr|PROT03|FAM98B	pr|PROT03|FAM98B	intra-protein xl	mfaini_C1912_032.c.11538.11538.5_mfaini_C1912_032.c.11542.11542.5	37	110	73	4715.4	944.087	5	-2.2	0.16	0.66	20.22

## Sheet: Replicate 2
Id	Protein1	Protein2	XLType	Spectrum	AbsPos1	AbsPos2	deltaAA	Mr	Mz	z	Error_rel[ppm]	TIC	deltaS	ld-Score
HDDYLVMLKAIR-LGKSHIR-a9-b3	pr|PROT04|CGI-99	pr|PROT02|DDX1	inter-protein xl	mfaini_C1912_044.c.04713.04713.4_mfaini_C1912_044.c.04684.04684.4	154	461		2420.33	606.091	4	-1.2	0.43	0.82	45.38
LTALDYHNPAGFNCKDETEFR-EVKEWHGCR-a15-b3	pr|PROT04|CGI-99	pr|PROT02|DDX1	inter-protein xl	mfaini_C1912_043.c.04384.04384.4_mfaini_C1912_043.c.04355.04355.4	20	117		3834.75	959.694	4	-1.5	0.32	0.29	45.26
DILSKVQK-HYKIEDR-a5-b3	pr|PROT03|FAM98B	pr|PROT04|CGI-99	inter-protein xl	mfaini_C1912_043.c.03197.03197.3_mfaini_C1912_043.c.03163.03163.3	184	41		2027.1	676.709	3	-0.9	0.44	0.75	44.33
VKTDDIAR-LGKVGR-a2-b3	pr|PROT03|FAM98B	pr|PROT04|CGI-99	inter-protein xl	mfaini_C1912_044.c.01184.01184.4_mfaini_C1912_044.c.01126.01126.4	245	241		1682.96	421.748	4	-3.5	0.38	0.23	44.1
TDDVHAKDNTRPGANSPEMWSEAIK-VEQHVVDGKER-a7-b9	pr|PROT02|DDX1	pr|PROT01|HSPC117	inter-protein xl	mfaini_C1912_045.c.03047.03047.5_mfaini_C1912_045.c.03025.03025.5	472	366		4201.01	841.209	5	-1.2	0.39	0.29	43.13
VASPKLVMEEAPESYK-MHNQIPQVTSDGKR-a5-b13	pr|PROT01|HSPC117	pr|PROT02|DDX1	inter-protein xl	mfaini_C1912_043.c.04278.04278.5_mfaini_C1912_043.c.04242.04242.5	465	399		3524.76	705.959	5	-2.8	0.45	0.26	42.85
INEAIVAVQAIIADPKTDHR-VKTDDIAR-a16-b2	pr|PROT04|CGI-99	pr|PROT03|FAM98B	inter-protein xl	mfaini_C1912_044.c.06495.06495.5_mfaini_C1912_044.c.06474.06474.5	234	245		3227.75	646.558	5	-0.1	0.48	0.48	42.17
INEAIVAVQAIIADPKTDHR-IYQPKR-a16-b5	pr|PROT04|CGI-99	pr|PROT03|FAM98B	inter-protein xl	mfaini_C1912_044.c.06171.06171.5_mfaini_C1912_044.c.06155.06155.5	234	256		3114.72	623.951	5	-0.3	0.56	0.4	42
EHKMDQAIIFCR-DKIIVNDR-a3-b2	pr|PROT02|DDX1	pr|PROT01|HSPC117	inter-protein xl	mfaini_C1912_044.c.04401.04401.4_mfaini_C1912_044.c.04370.04370.4	505	285		2656.35	665.095	4	1.4	0.39	0.72	41.36
VEQHVVDGKER-LGKSHIR-a9-b3	pr|PROT01|HSPC117	pr|PROT02|DDX1	inter-protein xl	mfaini_C1912_044.c.00440.00440.4_mfaini_C1912_044.c.00438.00438.4	366	461		2242.21	561.561	4	-2.3	0.46	0.78	41.29
LTQDAVAKANQTK-DILSKVQK-a8-b5	pr|PROT04|CGI-99	pr|PROT03|FAM98B	inter-protein xl	mfaini_C1912_046.c.03912.03912.3_mfaini_C1912_046.c.03881.03881.3	171	184		2454.37	819.13	3	-1.3	0.54	0.4	41.29
LTQDAVAKANQTK-IYQPKR-a8-b5	pr|PROT04|CGI-99	pr|PROT03|FAM98B	inter-protein xl	mfaini_C1912_044.c.01500.01500.3_mfaini_C1912_044.c.01473.01473.3	171	256		2328.28	777.101	3	-0.3	0.54	0.3	40.56
ANQTKEGLPVALDK-NHVGKPLLK-a5-b5	pr|PROT04|CGI-99	pr|PROT03|FAM98B	inter-protein xl	mfaini_C1912_043.c.03299.03299.4_mfaini_C1912_043.c.03277.03277.4	176	192		2625.47	657.376	4	-4.4	0.35	0.83	40.22
LTALDYHNPAGFNCKDETEFR-VEQHVVDGKER-a15-b9	pr|PROT04|CGI-99	pr|PROT01|HSPC117	inter-protein xl	mfaini_C1912_044.c.03746.03746.4_mfaini_C1912_044.c.03732.03732.4	20	366		3929.86	983.473	4	-0.8	0.44	0.43	40.04
LTQDAVAKANQTK-EKTACAINK-a8-b2	pr|PROT04|CGI-99	pr|PROT03|FAM98B	inter-protein xl	mfaini_C1912_045.c.01600.01600.4_mfaini_C1912_045.c.01580.01580.4	171	292		2558.33	640.591	4	-2	0.35	0.54	39.9
ANQTKEGLPVALDK-EDLSKIIR-a5-b5	pr|PROT04|CGI-99	pr|PROT03|FAM98B	inter-protein xl	mfaini_C1912_045.c.05539.05539.3_mfaini_C1912_045.c.05517.05517.3	176	280		2593.43	865.484	3	-1.1	0.39	0.31	39.48
VASPKLVMEEAPESYK-LGKSHIR-a5-b3	pr|PROT01|HSPC117	pr|PROT02|DDX1	inter-protein xl	mfaini_C1912_045.c.03638.03638.4_mfaini_C1912_045.c.03615.03615.4	465	461		2724.45	682.12	4	-0.8	0.42	0.83	38.96
KGHQFSCVCLHGDR-LGKVGR-a1-b3	pr|PROT02|DDX1	pr|PROT04|CGI-99	inter-protein xl	mfaini_C1912_044.c.01161.01161.4_mfaini_C1912_044.c.01119.01119.4	536	241		2466.24	617.567	4	-0.5	0.32	0.34	38.78
ANQTKEGLPVALDK-KMGIDHK-a5-b1	pr|PROT04|CGI-99	pr|PROT01|HSPC117	inter-protein xl	mfaini_C1912_046.c.02903.02903.4_mfaini_C1912_046.c.02882.02882.4	176	245		2448.3	613.082	4	-2.6	0.38	0.74	38.59
TDDVHAKDNTRPGANSPEMWSEAIK-LTALDYHNPAGFNCKDETEFR-a7-b15	pr|PROT02|DDX1	pr|PROT04|CGI-99	inter-protein xl	mfaini_C1912_044.c.05273.05273.5_mfaini_C1912_044.c.05285.05285.5	472	20		5403.49	1081.7	5	0.5	0.38	0.25	38.54
YALSPKTTITMAHLLAAR-HDDYLVMLKAIR-a6-b9	pr|PROT03|FAM98B	pr|PROT04|CGI-99	inter-protein xl	mfaini_C1912_044.c.08684.08684.5_mfaini_C1912_044.c.08654.08654.5	263	154		3567.93	714.594	5	0.4	0.72	0.67	37.83
VEQHVVDGKER-EVKEWHGCR-a9-b3	pr|PROT01|HSPC117	pr|PROT02|DDX1	inter-protein xl	mfaini_C1912_043.c.00935.00935.4_mfaini_C1912_043.c.00912.00912.4	366	117		2632.27	659.076	4	-2.8	0.24	0.66	37.57
KLTALDYHNPAGFNCKDETEFR-GKGCYNTR-a16-b2	pr|PROT04|CGI-99	pr|PROT02|DDX1	inter-protein xl	mfaini_C1912_043.c.03461.03461.4_mfaini_C1912_043.c.03454.03454.4	20	636		3717.72	930.438	4	-2.6	0.49	0.25	37.54
EHKMDQAIIFCR-VEQHVVDGKER-a3-b9	pr|PROT02|DDX1	pr|PROT01|HSPC117	inter-protein xl	mfaini_C1912_043.c.02820.02820.4_mfaini_C1912_043.c.02789.02789.4	505	366		2979.46	745.873	4	-3.5	0.27	0.25	37.46
HDDYLVMLKAIR-IYQPKR-a9-b5	pr|PROT04|CGI-99	pr|PROT03|FAM98B	inter-protein xl	mfaini_C1912_045.c.05851.05851.4_mfaini_C1912_045.c.05849.05849.4	154	256		2414.32	604.587	4	1.1	0.65	0.67	37.07
DKIIVNDR-LGKSHIR-a2-b3	pr|PROT01|HSPC117	pr|PROT02|DDX1	inter-protein xl	mfaini_C1912_044.c.01457.01457.4_mfaini_C1912_044.c.01434.01434.4	285	461		1919.1	480.781	4	-0.4	0.67	0.89	37
VEQHVVDGKER-HYKIEDR-a9-b3	pr|PROT01|HSPC117	pr|PROT04|CGI-99	inter-protein xl	mfaini_C1912_045.c.00727.00727.4_mfaini_C1912_045.c.00699.00699.4	366	41		2392.21	599.061	4	0.1	0.43	0.44	36.69
LTQDAVAKANQTK-EDLSKIIR-a8-b5	pr|PROT04|CGI-99	pr|PROT03|FAM98B	inter-protein xl	mfaini_C1912_046.c.03728.03728.3_mfaini_C1912_046.c.03682.03682.3	171	280		2497.36	833.463	3	-4.4	0.36	0.5	36.6
KEDCLKLLLFLSTELQASQILQNK-DVNCPFKIQDR-a6-b7	pr|PROT03|FAM98B	pr|PROT04|CGI-99	inter-protein xl	mfaini_C1912_043.c.11544.11544.5_mfaini_C1912_043.c.11519.11519.5	115	72		4360.28	873.063	5	-1.2	0.29	0.87	36.34
LTQDAVAKANQTK-VQKNHVGKPLLK-a8-b3	pr|PROT04|CGI-99	pr|PROT03|FAM98B	inter-protein xl	mfaini_C1912_044.c.00962.00962.5_mfaini_C1912_044.c.00961.00961.5	171	187		2884.64	577.937	5	-2.2	0.41	0.81	36.33
VPVDEFDGKVTYGQK-VEQHVVDGKER-a9-b9	pr|PROT02|DDX1	pr|PROT01|HSPC117	inter-protein xl	mfaini_C1912_043.c.03209.03209.4_mfaini_C1912_043.c.03194.03194.4	687	366		3113.56	779.397	4	-2.8	0.52	0.29	36.18
IYQPKR-LGKVGR-a5-b3	pr|PROT03|FAM98B	pr|PROT04|CGI-99	inter-protein xl	mfaini_C1912_044.c.00851.00851.3_mfaini_C1912_044.c.00832.00832.3	256	241		1569.93	524.319	3	-1	0.61	0	35.97
DKIIVNDR-KQNLER-a2-b1	pr|PROT01|HSPC117	pr|PROT02|DDX1	inter-protein xl	mfaini_C1912_043.c.01719.01719.3_mfaini_C1912_043.c.01710.01710.3	285	555		1896.04	633.021	3	-2.5	0.41	0.54	35.38
LDDLVSTGKLNLSQVR-VASPKLVMEEAPESYK-a9-b5	pr|PROT02|DDX1	pr|PROT01|HSPC117	inter-protein xl	mfaini_C1912_045.c.07621.07621.4_mfaini_C1912_045.c.07629.07629.4	358	465		3671.93	918.99	4	-1.6	0.38	0.27	35.33
TKIDCDNLEQYFIQQGGGPDK-DKIIVNDR-a2-b2	pr|PROT02|DDX1	pr|PROT01|HSPC117	inter-protein xl	mfaini_C1912_043.c.07372.07372.4_mfaini_C1912_043.c.07345.07345.4	516	285		3534.72	884.689	4	-1.4	0.37	0.38	35.11
EGLPVALDKHILGFDTGDAVLNEAAQILR-NVTDVVNTCHDAGISKK-a9-b16	pr|PROT04|CGI-99	pr|PROT01|HSPC117	inter-protein xl	mfaini_C1912_043.c.10004.10004.4_mfaini_C1912_043.c.10074.10074.4	185	492		5069.62	1268.41	4	1.3	0.28	0.82	35.1
EDLSKIIR-KMGIDHK-a5-b1	pr|PROT03|FAM98B	pr|PROT01|HSPC117	inter-protein xl	mfaini_C1912_045.c.03032.03032.4_mfaini_C1912_045.c.03001.03001.4	280	245		1938.06	485.522	4	-1.5	0.37	0.7	35
TKIDCDNLEQYFIQQGGGPDK-MLQADPNKVSAR-a2-b8	pr|PROT02|DDX1	pr|PROT01|HSPC117	inter-protein xl	mfaini_C1912_043.c.06840.06840.4_mfaini_C1912_043.c.06813.06813.4	516	206		3891.87	973.976	4	-1.4	0.28	0.86	34.92
MLQADPNKVSAR-VTYGQKR-a8-b6	pr|PROT01|HSPC117	pr|PROT02|DDX1	inter-protein xl	mfaini_C1912_043.c.01841.01841.4_mfaini_C1912_043.c.01829.01829.4	206	693		2317.21	580.311	4	-3.2	0.47	0.6	34.83
AAGGGSYKGHVDILAPTVQELAALEK-MLQADPNKVSAR-a8-b8	pr|PROT02|DDX1	pr|PROT01|HSPC117	inter-protein xl	mfaini_C1912_044.c.06905.06905.5_mfaini_C1912_044.c.06889.06889.5	702	206		4061.12	813.232	5	-1.4	0.31	0.84	34.54
DKIIVNDR-LGKVGR-a2-b3	pr|PROT01|HSPC117	pr|PROT04|CGI-99	inter-protein xl	mfaini_C1912_044.c.02091.02091.3_mfaini_C1912_044.c.02056.02056.3	285	241		1738.01	580.344	3	-0.5	0.38	0.25	34.51
HYKIEDR-IYQPKR-a3-b5	pr|PROT04|CGI-99	pr|PROT03|FAM98B	inter-protein xl	mfaini_C1912_045.c.01026.01026.3_mfaini_C1912_045.c.01002.01002.3	41	256		1901.01	634.678	3	-2.7	0.44	0.51	34.15
TADNATKNAEPLINLDVNNPDFK-KQNLER-a7-b1	pr|PROT04|CGI-99	pr|PROT02|DDX1	inter-protein xl	mfaini_C1912_044.c.05056.05056.4_mfaini_C1912_044.c.05053.05053.4	115	555		3437.74	860.442	4	-1.5	0.35	0.35	34.05
HYKIEDR-VTYGQKR-a3-b6	pr|PROT04|CGI-99	pr|PROT02|DDX1	inter-protein xl	mfaini_C1912_046.c.00777.00777.3_mfaini_C1912_046.c.00740.00740.3	41	693		1948.01	650.344	3	-4.5	0.3	0.44	33.84
ILKGEYAVR-LGKVGR-a3-b3	pr|PROT02|DDX1	pr|PROT04|CGI-99	inter-protein xl	mfaini_C1912_043.c.02351.02351.3_mfaini_C1912_043.c.02333.02333.3	493	241		1814.08	605.7	3	-1.3	0.54	0.78	33.79
LEYGDNAEKYK-HKNSQLDK-a9-b2	pr|PROT04|CGI-99	pr|PROT03|FAM98B	inter-protein xl	mfaini_C1912_044.c.00973.00973.3_mfaini_C1912_044.c.00947.00947.3	98	136		2435.19	812.738	3	-2	0.52	0.77	33.78
VEQHVVDGKER-FFEKYLR-a9-b4	pr|PROT01|HSPC117	pr|PROT04|CGI-99	inter-protein xl	mfaini_C1912_044.c.03290.03290.4_mfaini_C1912_044.c.03257.03257.4	366	62		2434.26	609.573	4	-1.9	0.54	0.47	33.52
EKTACAINK-LGKVGR-a2-b3	pr|PROT03|FAM98B	pr|PROT04|CGI-99	inter-protein xl	mfaini_C1912_044.c.00798.00798.4_mfaini_C1912_044.c.00765.00765.4	292	241		1799.99	451.005	4	-2.2	0.23	0.71	33.41
GPEPGPQPTMEGDVLDTLEALGYKGPLLEEQALTK-YKDLVPDNSK-a24-b2	pr|PROT03|FAM98B	pr|PROT04|CGI-99	inter-protein xl	mfaini_C1912_044.c.11575.11575.4_mfaini_C1912_044.c.11718.11718.4	26	100		5008.52	1253.14	4	0.2	0.4	0.22	33.34
LTALDYHNPAGFNCKDETEFR-VKTDDIAR-a15-b2	pr|PROT04|CGI-99	pr|PROT03|FAM98B	inter-protein xl	mfaini_C1912_044.c.04519.04519.4_mfaini_C1912_044.c.04498.04498.4	20	245		3551.68	888.929	4	-4	0.43	0	33.33
KGHQFSCVCLHGDR-VEQHVVDGKER-a1-b9	pr|PROT02|DDX1	pr|PROT01|HSPC117	inter-protein xl	mfaini_C1912_044.c.00932.00932.5_mfaini_C1912_044.c.00935.00935.5	536	366		3132.49	627.506	5	-2.9	0.31	0.55	33.23
VKTDDIAR-VTYGQKR-a2-b6	pr|PROT03|FAM98B	pr|PROT02|DDX1	inter-protein xl	mfaini_C1912_046.c.01075.01075.3_mfaini_C1912_046.c.01049.01049.3	245	693		1905.03	636.016	3	-3.6	0.48	0.35	33.1
LTALDYHNPAGFNCKDETEFR-GKGCYNTR-a15-b2	pr|PROT04|CGI-99	pr|PROT02|DDX1	inter-protein xl	mfaini_C1912_045.c.04344.04344.4_mfaini_C1912_045.c.04322.04322.4	20	636		3589.62	898.414	4	-3.3	0.52	0	33.02
LTALDYHNPAGFNCKDETEFR-IYQPKR-a15-b5	pr|PROT04|CGI-99	pr|PROT03|FAM98B	inter-protein xl	mfaini_C1912_046.c.04560.04560.4_mfaini_C1912_046.c.04539.04539.4	20	256		3438.66	860.673	4	-1.5	0.49	0.77	32.73
VASPKLVMEEAPESYK-EVKEWHGCR-a5-b3	pr|PROT01|HSPC117	pr|PROT02|DDX1	inter-protein xl	mfaini_C1912_045.c.04451.04451.4_mfaini_C1912_045.c.04410.04410.4	465	117		3114.51	779.634	4	-2.9	0.39	0.36	32.41
KEDCLKLLLFLSTELQASQILQNK-DVNCPFKIQDR-a1-b7	pr|PROT03|FAM98B	pr|PROT04|CGI-99	inter-protein xl	mfaini_C1912_044.c.11272.11272.5_mfaini_C1912_044.c.11241.11241.5	110	72		4360.26	873.06	5	-4.8	0.18	0.72	32.38
VEQHVVDGKER-VTYGQKR-a9-b6	pr|PROT01|HSPC117	pr|PROT02|DDX1	inter-protein xl	mfaini_C1912_043.c.00570.00570.5_mfaini_C1912_043.c.00558.00558.5	366	693		2283.19	457.646	5	-2.2	0.67	0.6	31.8
KGHQFSCVCLHGDR-DKIIVNDR-a1-b2	pr|PROT02|DDX1	pr|PROT01|HSPC117	inter-protein xl	mfaini_C1912_044.c.02028.02028.4_mfaini_C1912_044.c.01995.01995.4	536	285		2809.38	703.352	4	1	0.38	0.46	31.53
EVKEWHGCR-DKIIVNDR-a3-b2	pr|PROT02|DDX1	pr|PROT01|HSPC117	inter-protein xl	mfaini_C1912_046.c.02458.02458.3_mfaini_C1912_046.c.02440.02440.3	117	285		2309.16	770.727	3	-0.5	0.29	0.74	31.48
TDDVHAKDNTRPGANSPEMWSEAIK-DKIIVNDR-a7-b2	pr|PROT02|DDX1	pr|PROT01|HSPC117	inter-protein xl	mfaini_C1912_046.c.04415.04415.4_mfaini_C1912_046.c.04377.04377.4	472	285		3877.89	970.481	4	0.1	0.47	0.36	31.33
LTALDYHNPAGFNCKDETEFR-KQNLER-a15-b1	pr|PROT04|CGI-99	pr|PROT02|DDX1	inter-protein xl	mfaini_C1912_043.c.04195.04195.5_mfaini_C1912_043.c.04159.04159.5	20	555		3421.63	685.334	5	-0.8	0.67	0.34	31.17
VASPKLVMEEAPESYK-GKGCYNTR-a5-b2	pr|PROT01|HSPC117	pr|PROT02|DDX1	inter-protein xl	mfaini_C1912_043.c.03936.03936.4_mfaini_C1912_043.c.03901.03901.4	465	636		2869.4	718.358	4	0.3	0.33	0.25	31.03
DVNCPFKIQDR-KKEDCLK-a7-b2	pr|PROT04|CGI-99	pr|PROT03|FAM98B	inter-protein xl	mfaini_C1912_043.c.02445.02445.4_mfaini_C1912_043.c.02404.02404.4	72	110		2448.21	613.061	4	-0.9	0.53	0.87	30.88
AAGGGSYKGHVDILAPTVQELAALEK-IASPEGQDYLKGMAAAGNYAWVNR-a8-b11	pr|PROT02|DDX1	pr|PROT01|HSPC117	inter-protein xl	mfaini_C1912_045.c.09384.09384.5_mfaini_C1912_045.c.09383.09383.5	702	308		5313.67	1063.74	5	-1.2	0.29	0.57	30.82
EDLSKIIR-KXGIDHK-a5-b1	pr|PROT03|FAM98B	pr|PROT01|HSPC117	inter-protein xl	mfaini_C1912_043.c.02020.02020.4_mfaini_C1912_043.c.02002.02002.4	280	245		1954.05	489.521	4	-2.4	0.3	0.6	30.79
EHKMDQAIIFCR-IYQPKR-a3-b5	pr|PROT02|DDX1	pr|PROT03|FAM98B	inter-protein xl	mfaini_C1912_043.c.03306.03306.4_mfaini_C1912_043.c.03289.03289.4	505	256		2488.27	623.075	4	-1.2	0.38	0.76	30.57
EGYAWAEDKEHCEEYGR-LGKVGR-a9-b3	pr|PROT01|HSPC117	pr|PROT04|CGI-99	inter-protein xl	mfaini_C1912_044.c.03438.03438.4_mfaini_C1912_044.c.03418.03418.4	190	241		2894.33	724.589	4	-1.1	0.59	0.51	30.52
VTYGQKR-IYQPKR-a6-b5	pr|PROT02|DDX1	pr|PROT03|FAM98B	inter-protein xl	mfaini_C1912_046.c.00808.00808.4_mfaini_C1912_046.c.00763.00763.4	693	256		1792	449.007	4	-1.5	0.47	0.62	30.27
TADNATKNAEPLINLDVNNPDFK-HKNSQLDK-a7-b2	pr|PROT04|CGI-99	pr|PROT03|FAM98B	inter-protein xl	mfaini_C1912_044.c.04131.04131.4_mfaini_C1912_044.c.04125.04125.4	115	136		3619.81	905.96	4	-1	0.46	0.25	30.17
LTQDAVAKANQTK-KMGIDHK-a8-b1	pr|PROT04|CGI-99	pr|PROT01|HSPC117	inter-protein xl	mfaini_C1912_045.c.01372.01372.4_mfaini_C1912_045.c.01331.01331.4	171	245		2352.24	589.068	4	-3	0.3	0.62	30.13
YALSPKTTITMAHLLAAR-AIKEHK-a6-b3	pr|PROT03|FAM98B	pr|PROT02|DDX1	inter-protein xl	mfaini_C1912_044.c.04748.04748.4_mfaini_C1912_044.c.04709.04709.4	263	502		2819.57	705.899	4	-2.5	0.55	0.55	30.02
DKIIVNDR-VTYGQKR-a2-b6	pr|PROT01|HSPC117	pr|PROT02|DDX1	inter-protein xl	mfaini_C1912_043.c.01898.01898.3_mfaini_C1912_043.c.01874.01874.3	285	693		1960.07	654.365	3	-1.6	0.42	0.46	30.01
VKTDDIAR-HYKIEDR-a2-b3	pr|PROT03|FAM98B	pr|PROT04|CGI-99	inter-protein xl	mfaini_C1912_043.c.01261.01261.4_mfaini_C1912_043.c.01227.01227.4	245	41		2014.04	504.518	4	-3.4	0.23	0.52	29.96
STTSDIPHMLNQVESKVK-HYKIEDR-a16-b3	pr|PROT03|FAM98B	pr|PROT04|CGI-99	inter-protein xl	mfaini_C1912_044.c.05417.05417.4_mfaini_C1912_044.c.05375.05375.4	177	41		3110.57	778.65	4	0	0.58	0.56	29.87
LTALDYHNPAGFNCKDETEFR-VTYGQKR-a15-b6	pr|PROT04|CGI-99	pr|PROT02|DDX1	inter-protein xl	mfaini_C1912_044.c.04123.04123.5_mfaini_C1912_044.c.04128.04128.5	20	693		3485.66	698.141	5	-0.8	0.42	0.49	29.4
EQLAQAMFDHIPVGVGSKGVIPMNAK-INEAIVAVQAIIADPKTDHR-a18-b16	pr|PROT01|HSPC117	pr|PROT04|CGI-99	inter-protein xl	mfaini_C1912_045.c.09488.09488.5_mfaini_C1912_045.c.09455.09455.5	158	234		5047.64	1010.54	5	-4.1	0.23	0.63	29.36
TDDVHAKDNTRPGANSPEMWSEAIK-VKTDDIAR-a7-b2	pr|PROT02|DDX1	pr|PROT03|FAM98B	inter-protein xl	mfaini_C1912_043.c.03451.03451.4_mfaini_C1912_043.c.03431.03431.4	472	245		3822.83	956.716	4	-3.9	0.4	0.44	29.29
YKDLVPDNSK-HKNSQLDK-a2-b2	pr|PROT04|CGI-99	pr|PROT03|FAM98B	inter-protein xl	mfaini_C1912_045.c.01398.01398.3_mfaini_C1912_045.c.01367.01367.3	100	136		2284.16	762.395	3	-3.1	0.31	0.81	29.27
EVKEWHGCR-LGKVGR-a3-b3	pr|PROT02|DDX1	pr|PROT04|CGI-99	inter-protein xl	mfaini_C1912_044.c.01283.01283.4_mfaini_C1912_044.c.01219.01219.4	117	241		1966.02	492.513	4	-0.8	0.24	0.55	28.93
LTALDYHNPAGFNCKDETEFR-LGKSHIR-a15-b3	pr|PROT04|CGI-99	pr|PROT02|DDX1	inter-protein xl	mfaini_C1912_044.c.03661.03661.4_mfaini_C1912_044.c.03645.03645.4	20	461		3444.7	862.182	4	2.3	0.44	0.47	28.84
VASPKLVMEEAPESYK-KQNLER-a5-b1	pr|PROT01|HSPC117	pr|PROT02|DDX1	inter-protein xl	mfaini_C1912_043.c.03960.03960.3_mfaini_C1912_043.c.03925.03925.3	465	555		2701.4	901.473	3	-1.5	0.55	0.29	28.11
STTSDIPHMLNQVESKVK-LTQDAVAKANQTK-a16-b8	pr|PROT03|FAM98B	pr|PROT04|CGI-99	inter-protein xl	mfaini_C1912_045.c.06034.06034.4_mfaini_C1912_045.c.06008.06008.4	177	171		3537.83	885.465	4	-1.6	0.28	0.9	26.3
LEYGDNAEKYK-IYQPKR-a9-b5	pr|PROT04|CGI-99	pr|PROT03|FAM98B	inter-protein xl	mfaini_C1912_044.c.02060.02060.3_mfaini_C1912_044.c.02044.02044.3	98	256		2270.15	757.725	3	-3.3	0.33	0.82	26.24
LDDLVSTGKLNLSQVR-VASPKLVXEEAPESYK-a9-b5	pr|PROT02|DDX1	pr|PROT01|HSPC117	inter-protein xl	mfaini_C1912_045.c.06657.06657.4_mfaini_C1912_045.c.06634.06634.4	358	465		3687.93	922.989	4	-0.9	0.28	0.37	25.54
GPEPGPQPTXEGDVLDTLEALGYKGPLLEEQALTK-YKDLVPDNSK-a24-b2	pr|PROT03|FAM98B	pr|PROT04|CGI-99	inter-protein xl	mfaini_C1912_045.c.10723.10723.4_mfaini_C1912_045.c.10710.10710.4	26	100		5024.5	1257.13	4	-2.6	0.3	0.46	23.95
EMACPYSVLISGDIKDR-LDDLVSTGKLNLSQVR-a15-b9	pr|PROT03|FAM98B	pr|PROT02|DDX1	inter-protein xl	mfaini_C1912_044.c.08706.08706.4_mfaini_C1912_044.c.08685.08685.4	104	358		3847.95	962.996	4	-5	0.47	0.73	22.31
YALSPKTTITMAHLLAAR-LEYGDNAEKYK-a6-b9	pr|PROT03|FAM98B	pr|PROT04|CGI-99	inter-protein xl	mfaini_C1912_043.c.06702.06702.4_mfaini_C1912_043.c.06656.06656.4	263	98		3423.76	856.948	4	-4.2	0.41	0.56	22.16
LGKSHIR-IYQPKR-a3-b5	pr|PROT02|DDX1	pr|PROT03|FAM98B	inter-protein xl	mfaini_C1912_044.c.00481.00481.3_mfaini_C1912_044.c.00482.00482.3	461	256		1751.02	584.68	3	-2.9	0.25	0.78	22.03
VEQHVVDGKER-KQNLER-a9-b1	pr|PROT01|HSPC117	pr|PROT02|DDX1	inter-protein xl	mfaini_C1912_044.c.00460.00460.4_mfaini_C1912_044.c.00504.00504.4	366	555		2219.16	555.798	4	-3.1	0.16	0.63	21.38
GLPQLGTLGAGNHYAEIQVVDEIFNEYAAKK-ANQTKEGLPVALDK-a30-b5	pr|PROT01|HSPC117	pr|PROT04|CGI-99	inter-protein xl	mfaini_C1912_046.c.10122.10122.5_mfaini_C1912_046.c.10171.10171.5	244	176		4965.56	994.121	5	-2.4	0.48	0.37	20.96
NSQLDKNSEVYQEVQAMFDTLGIPK-YKDLVPDNSK-a6-b2	pr|PROT03|FAM98B	pr|PROT04|CGI-99	inter-protein xl	mfaini_C1912_044.c.11158.11158.4_mfaini_C1912_044.c.11173.11173.4	142	100		4169.05	1043.27	4	-0.4	0.18	0.69	20.75
GPEPGPQPTMEGDVLDTLEALGYKGPLLEEQALTK-DLVPDNSKTADNATK-a24-b8	pr|PROT03|FAM98B	pr|PROT04|CGI-99	inter-protein xl	mfaini_C1912_043.c.12031.12031.4_mfaini_C1912_043.c.12060.12060.4	26	108		5418.69	1355.68	4	-0.4	0.23	0.3	20.57
HDDYLVMLKAIR-LGKVGR-a9-b3	pr|PROT04|CGI-99	pr|PROT04|CGI-99	intra-protein xl	mfaini_C1912_045.c.06074.06074.4_mfaini_C1912_045.c.06038.06038.4	154	241	87	2239.24	560.819	4	-2.6	0.58	0.74	46.69
GKHYYEVSCHDQGLCR-GHVKFSK-a2-b4	pr|PROT02|DDX1	pr|PROT02|DDX1	intra-protein xl	mfaini_C1912_043.c.01352.01352.3_mfaini_C1912_043.c.01339.01339.3	132	204	72	2947.38	983.468	3	-2	0.41	0.71	45.89
TKIDCDNLEQYFIQQGGGPDK-GKGCYNTR-a2-b2	pr|PROT02|DDX1	pr|PROT02|DDX1	intra-protein xl	mfaini_C1912_046.c.06207.06207.4_mfaini_C1912_046.c.06064.06064.4	516	636	120	3517.61	880.409	4	-5.2	0.47	0	45.03
INEAIVAVQAIIADPKTDHR-LGKVGR-a16-b3	pr|PROT04|CGI-99	pr|PROT04|CGI-99	intra-protein xl	mfaini_C1912_043.c.06603.06603.5_mfaini_C1912_043.c.06572.06572.5	234	241	7	2939.65	588.938	5	-2.2	0.7	0.87	44.81
TDDVHAKDNTRPGANSPEMWSEAIK-EVKEWHGCR-a7-b3	pr|PROT02|DDX1	pr|PROT02|DDX1	intra-protein xl	mfaini_C1912_044.c.03281.03281.5_mfaini_C1912_044.c.03230.03230.5	472	117	355	4105.9	822.187	5	-1.4	0.27	0.29	44.13
APDGYIVKSQHSGNAQVTQTK-ATKGLMK-a8-b3	pr|PROT02|DDX1	pr|PROT02|DDX1	intra-protein xl	mfaini_C1912_043.c.01906.01906.4_mfaini_C1912_043.c.01884.01884.4	268	126	142	3113.61	779.411	4	-1.3	0.57	0.49	43.02
LTQDAVAKANQTK-LGKVGR-a8-b3	pr|PROT04|CGI-99	pr|PROT04|CGI-99	intra-protein xl	mfaini_C1912_043.c.01546.01546.4_mfaini_C1912_043.c.01517.01517.4	171	241	70	2153.21	539.311	4	-2.4	0.61	0.73	43.01
MHNQIPQVTSDGKR-GKGCYNTR-a13-b2	pr|PROT02|DDX1	pr|PROT02|DDX1	intra-protein xl	mfaini_C1912_044.c.01357.01357.4_mfaini_C1912_044.c.01331.01331.4	399	636	237	2702.3	676.582	4	-1.5	0.44	0	42.96
VASPKLVMEEAPESYK-LRPIAVIKG-a5-b8	pr|PROT01|HSPC117	pr|PROT01|HSPC117	intra-protein xl	mfaini_C1912_043.c.05989.05989.4_mfaini_C1912_043.c.06142.06142.4	465	504	39	2880.59	721.156	4	-3.7	0.47	0.32	42.95
LGKSHIR-AIKEHK-a3-b3	pr|PROT02|DDX1	pr|PROT02|DDX1	intra-protein xl	mfaini_C1912_046.c.00450.00450.3_mfaini_C1912_046.c.00448.00448.3	461	502	41	1671.98	558.334	3	-0.5	0.44	0.74	42.55
TDDVHAKDNTRPGANSPEMWSEAIK-LGKSHIR-a7-b3	pr|PROT02|DDX1	pr|PROT02|DDX1	intra-protein xl	mfaini_C1912_046.c.02852.02852.5_mfaini_C1912_046.c.02907.02907.5	472	461	11	3715.83	744.173	5	-2.7	0.6	0.85	42.37
DGFVALSKAPDGYIVK-LDDLVSTGKLNLSQVR-a8-b9	pr|PROT02|DDX1	pr|PROT02|DDX1	intra-protein xl	mfaini_C1912_044.c.08440.08440.4_mfaini_C1912_044.c.08441.08441.4	260	358	98	3573.93	894.49	4	-0.5	0.48	0.71	42.29
APDGYIVKSQHSGNAQVTQTK-KQNLER-a8-b1	pr|PROT02|DDX1	pr|PROT02|DDX1	intra-protein xl	mfaini_C1912_043.c.01534.01534.5_mfaini_C1912_043.c.01513.01513.5	268	555	287	3152.62	631.531	5	-1.6	0.39	0.38	42.11
EHKMDQAIIFCR-ILKGEYAVR-a3-b3	pr|PROT02|DDX1	pr|PROT02|DDX1	intra-protein xl	mfaini_C1912_044.c.04410.04410.4_mfaini_C1912_044.c.04378.04378.4	505	493	12	2732.42	684.112	4	0.9	0.43	0.33	42.1
HYKIEDR-LGKVGR-a3-b3	pr|PROT04|CGI-99	pr|PROT04|CGI-99	intra-protein xl	mfaini_C1912_043.c.00851.00851.4_mfaini_C1912_043.c.00823.00823.4	41	241	200	1725.95	432.495	4	-2.3	0.62	0.39	41.71
TKIDCDNLEQYFIQQGGGPDK-EVKEWHGCR-a2-b3	pr|PROT02|DDX1	pr|PROT02|DDX1	intra-protein xl	mfaini_C1912_044.c.05888.05888.4_mfaini_C1912_044.c.05850.05850.4	516	117	399	3762.74	941.693	4	-0.2	0.39	0.15	41.38
APDGYIVKSQHSGNAQVTQTK-ATKGLXK-a8-b3	pr|PROT02|DDX1	pr|PROT02|DDX1	intra-protein xl	mfaini_C1912_046.c.01697.01697.5_mfaini_C1912_046.c.01677.01677.5	268	126	142	3129.61	626.929	5	-2.2	0.31	0.51	41.26
APDGYIVKSQHSGNAQVTQTK-TTIKTGASVLNK-a8-b4	pr|PROT02|DDX1	pr|PROT02|DDX1	intra-protein xl	mfaini_C1912_046.c.02786.02786.4_mfaini_C1912_046.c.02911.02911.4	268	82	186	3597.89	900.48	4	-2.8	0.45	0.61	41.2
VQKNHVGKPLLK-VKDILSK-a3-b2	pr|PROT03|FAM98B	pr|PROT03|FAM98B	intra-protein xl	mfaini_C1912_045.c.01662.01662.3_mfaini_C1912_045.c.01671.01671.3	187	179	8	2299.4	767.474	3	-0.2	0.3	0.74	40.77
FFEKYLR-HYKIEDR-a4-b3	pr|PROT04|CGI-99	pr|PROT04|CGI-99	intra-protein xl	mfaini_C1912_046.c.04081.04081.4_mfaini_C1912_046.c.04045.04045.4	62	41	21	2099.08	525.777	4	-2.8	0.66	0	40.51
SQHSGNAQVTQTKFLPNAPK-TTIKTGASVLNK-a13-b4	pr|PROT02|DDX1	pr|PROT02|DDX1	intra-protein xl	mfaini_C1912_046.c.03453.03453.5_mfaini_C1912_046.c.03447.03447.5	281	82	199	3521.88	705.383	5	-2.7	0.51	0.34	40.41
SQHSGNAQVTQTKFLPNAPK-GKTTIK-a13-b2	pr|PROT02|DDX1	pr|PROT02|DDX1	intra-protein xl	mfaini_C1912_045.c.02097.02097.4_mfaini_C1912_045.c.02084.02084.4	281	78	203	2936.57	735.15	4	-0.9	0.48	0.31	40.37
APDGYIVKSQHSGNAQVTQTK-MHNQIPQVTSDGKR-a8-b13	pr|PROT02|DDX1	pr|PROT02|DDX1	intra-protein xl	mfaini_C1912_043.c.02126.02126.5_mfaini_C1912_043.c.02110.02110.5	268	399	131	3975.97	796.202	5	-3.5	0.43	0.65	40.37
NQALFPACVLKNAELK-EVKEWHGCR-a11-b3	pr|PROT02|DDX1	pr|PROT02|DDX1	intra-protein xl	mfaini_C1912_045.c.05982.05982.5_mfaini_C1912_045.c.05990.05990.5	234	117	117	3152.58	631.524	5	-3.2	0.61	0.63	40.35
XHNQIPQVTSDGKR-GKGCYNTR-a13-b2	pr|PROT02|DDX1	pr|PROT02|DDX1	intra-protein xl	mfaini_C1912_044.c.00983.00983.4_mfaini_C1912_044.c.00968.00968.4	399	636	237	2718.29	680.58	4	-2.9	0.42	0.38	40.33
TKIDCDNLEQYFIQQGGGPDKK-GKGCYNTR-a2-b2	pr|PROT02|DDX1	pr|PROT02|DDX1	intra-protein xl	mfaini_C1912_043.c.05052.05052.5_mfaini_C1912_043.c.05016.05016.5	516	636	120	3645.72	730.151	5	-1.2	0.36	0.28	39.87
NLDFQDVLDKLADMGIAIR-VASPKLVXEEAPESYK-a10-b5	pr|PROT01|HSPC117	pr|PROT01|HSPC117	intra-protein xl	mfaini_C1912_043.c.12115.12115.4_mfaini_C1912_043.c.12105.12105.4	451	465	14	4077.06	1020.27	4	-1.2	0.33	0.64	39.8
APDGYIVKSQHSGNAQVTQTK-DQQEGKK-a8-b6	pr|PROT02|DDX1	pr|PROT02|DDX1	intra-protein xl	mfaini_C1912_046.c.01055.01055.4_mfaini_C1912_046.c.01559.01559.4	268	75	193	3197.59	800.406	4	-1	0.45	0.87	39.7
LDDLVSTGKLNLSQVR-EVKEWHGCR-a9-b3	pr|PROT02|DDX1	pr|PROT02|DDX1	intra-protein xl	mfaini_C1912_046.c.05393.05393.5_mfaini_C1912_046.c.05364.05364.5	358	117	241	3094.58	619.923	5	-3	0.31	0.52	39.6
MHNQIPQVTSDGKR-ILKGEYAVR-a13-b3	pr|PROT02|DDX1	pr|PROT02|DDX1	intra-protein xl	mfaini_C1912_044.c.02634.02634.4_mfaini_C1912_044.c.02616.02616.4	399	493	94	2795.47	699.876	4	-1.1	0.49	0.53	39.59
LDDLVSTGKLNLSQVR-MHNQIPQVTSDGKR-a9-b13	pr|PROT02|DDX1	pr|PROT02|DDX1	intra-protein xl	mfaini_C1912_043.c.05121.05121.5_mfaini_C1912_043.c.05104.05104.5	358	399	41	3504.83	701.973	5	-2.6	0.44	0.69	39.34
APDGYIVKSQHSGNAQVTQTK-GKTTIK-a8-b2	pr|PROT02|DDX1	pr|PROT02|DDX1	intra-protein xl	mfaini_C1912_045.c.01614.01614.4_mfaini_C1912_045.c.01594.01594.4	268	78	190	3012.58	754.153	4	-2.6	0.55	0.26	39.31
EVKEWHGCR-LGKSHIR-a3-b3	pr|PROT02|DDX1	pr|PROT02|DDX1	intra-protein xl	mfaini_C1912_044.c.00628.00628.4_mfaini_C1912_044.c.00631.00631.4	117	461	344	2147.09	537.781	4	-5.2	0.28	0.78	39.15
TGASVLNKWQMNPYDR-DQQEGKK-a8-b6	pr|PROT02|DDX1	pr|PROT02|DDX1	intra-protein xl	mfaini_C1912_045.c.05070.05070.4_mfaini_C1912_045.c.05056.05056.4	90	75	15	2848.37	713.101	4	-2.5	0.32	0.8	39.02
ELAEQTLNNIKQFK-KYIDNPKLR-a11-b7	pr|PROT02|DDX1	pr|PROT02|DDX1	intra-protein xl	mfaini_C1912_045.c.05610.05610.3_mfaini_C1912_045.c.05586.05586.3	307	317	10	2958.62	987.215	3	1.6	0.33	0.51	38.87
SQHSGNAQVTQTKFLPNAPK-MHNQIPQVTSDGKR-a13-b13	pr|PROT02|DDX1	pr|PROT02|DDX1	intra-protein xl	mfaini_C1912_044.c.02577.02577.5_mfaini_C1912_044.c.02536.02536.5	281	399	118	3899.97	781.001	5	-1.3	0.44	0.3	38.68
ELAEQTLNNIKQFK-YIDNPKLR-a11-b6	pr|PROT02|DDX1	pr|PROT02|DDX1	intra-protein xl	mfaini_C1912_045.c.06454.06454.4_mfaini_C1912_045.c.06432.06432.4	307	317	10	2830.53	708.639	4	1.2	0.4	0.47	38.61
IDCDNLEQYFIQQGGGPDKK-ILKGEYAVR-a19-b3	pr|PROT02|DDX1	pr|PROT02|DDX1	intra-protein xl	mfaini_C1912_044.c.06837.06837.4_mfaini_C1912_044.c.06831.06831.4	535	493	42	3509.74	878.443	4	-2.8	0.37	0.51	38.6
TTIKTGASVLNK-DQQEGKK-a4-b6	pr|PROT02|DDX1	pr|PROT02|DDX1	intra-protein xl	mfaini_C1912_043.c.01545.01545.4_mfaini_C1912_043.c.01522.01522.4	82	75	7	2201.19	551.305	4	-1.5	0.4	0.49	38.32
TTIKTGASVLNK-ATKGLMK-a4-b3	pr|PROT02|DDX1	pr|PROT02|DDX1	intra-protein xl	mfaini_C1912_046.c.02688.02688.3_mfaini_C1912_046.c.02676.02676.3	82	126	44	2117.21	706.744	3	-2.6	0.54	0.85	38.26
MHNQIPQVTSDGKR-DQQEGKK-a13-b6	pr|PROT02|DDX1	pr|PROT02|DDX1	intra-protein xl	mfaini_C1912_044.c.00807.00807.4_mfaini_C1912_044.c.00773.00773.4	399	75	324	2579.27	645.826	4	-1.9	0.57	0.83	38.05
EVKEWHGCR-KQNLER-a3-b1	pr|PROT02|DDX1	pr|PROT02|DDX1	intra-protein xl	mfaini_C1912_044.c.00845.00845.3_mfaini_C1912_044.c.00821.00821.3	117	555	438	2124.05	709.025	3	-1.4	0.38	0.78	37.89
SQHSGNAQVTQTKFLPNAPK-DQQEGKK-a13-b6	pr|PROT02|DDX1	pr|PROT02|DDX1	intra-protein xl	mfaini_C1912_044.c.01646.01646.4_mfaini_C1912_044.c.01633.01633.4	281	75	206	3121.58	781.402	4	-0.6	0.5	0.28	37.86
ELAEQTLNNIKQFK-KYIDNPK-a11-b1	pr|PROT02|DDX1	pr|PROT02|DDX1	intra-protein xl	mfaini_C1912_045.c.05826.05826.3_mfaini_C1912_045.c.05791.05791.3	307	311	4	2689.43	897.485	3	-0.8	0.53	0.39	37.86
APDGYIVKSQHSGNAQVTQTK-TGASVLNKWQMNPYDR-a8-b8	pr|PROT02|DDX1	pr|PROT02|DDX1	intra-protein xl	mfaini_C1912_044.c.04935.04935.4_mfaini_C1912_044.c.04891.04891.4	268	90	178	4245.08	1062.28	4	-2	0.37	0.68	37.72
TKIDCDNLEQYFIQQGGGPDK-KQNLER-a2-b1	pr|PROT02|DDX1	pr|PROT02|DDX1	intra-protein xl	mfaini_C1912_044.c.05878.05878.4_mfaini_C1912_044.c.05848.05848.4	516	555	39	3349.63	838.415	4	0.8	0.42	0.25	37.72
LDDLVSTGKLNLSQVR-FLPNAPKALIVEPSR-a9-b7	pr|PROT02|DDX1	pr|PROT02|DDX1	intra-protein xl	mfaini_C1912_043.c.08057.08057.4_mfaini_C1912_043.c.08016.08016.4	358	288	70	3545.99	887.504	4	1	0.45	0.72	37.46
IASPEGQDYLKGMAAAGNYAWVNR-MLQADPNKVSAR-a11-b8	pr|PROT01|HSPC117	pr|PROT01|HSPC117	intra-protein xl	mfaini_C1912_046.c.07325.07325.3_mfaini_C1912_046.c.07312.07312.3	308	206	102	4048	1350.34	3	2.5	0.6	0.76	37.42
NQALFPACVLKNAELK-FGFGFGGTGKK-a11-b10	pr|PROT02|DDX1	pr|PROT02|DDX1	intra-protein xl	mfaini_C1912_043.c.08431.08431.4_mfaini_C1912_043.c.07970.07970.4	234	172	62	3054.59	764.657	4	-1.5	0.63	0.89	37.17
GLGHQVATDALVAMEKAMKR-RDKIIVNDR-a19-b3	pr|PROT01|HSPC117	pr|PROT01|HSPC117	intra-protein xl	mfaini_C1912_046.c.08402.08402.5_mfaini_C1912_046.c.08715.08715.5	282	285	3	3390.82	679.171	5	-1.7	0.47	0.38	36.91
VQKNHVGKPLLK-VKDILSK-a8-b2	pr|PROT03|FAM98B	pr|PROT03|FAM98B	intra-protein xl	mfaini_C1912_044.c.01430.01430.5_mfaini_C1912_044.c.01537.01537.5	192	179	13	2299.4	460.888	5	0	0.34	0.79	36.88
LDDLVSTGKLNLSQVR-TTIKTGASVLNK-a9-b4	pr|PROT02|DDX1	pr|PROT02|DDX1	intra-protein xl	mfaini_C1912_043.c.06198.06198.4_mfaini_C1912_043.c.06176.06176.4	358	82	276	3126.74	782.694	4	-1.8	0.43	0.71	36.8
KGHQFSCVCLHGDR-EVKEWHGCR-a1-b3	pr|PROT02|DDX1	pr|PROT02|DDX1	intra-protein xl	mfaini_C1912_043.c.01584.01584.5_mfaini_C1912_043.c.01558.01558.5	536	117	419	3037.38	608.483	5	-2.8	0.29	0.3	36.8
TGASVLNKWQMNPYDR-GKTTIK-a8-b2	pr|PROT02|DDX1	pr|PROT02|DDX1	intra-protein xl	mfaini_C1912_046.c.05108.05108.3_mfaini_C1912_046.c.05081.05081.3	90	78	12	2663.37	888.798	3	-1.2	0.41	0.33	36.52
NIHSSDWPKFFEK-DVNCPFKIQDR-a9-b7	pr|PROT04|CGI-99	pr|PROT04|CGI-99	intra-protein xl	mfaini_C1912_044.c.06194.06194.5_mfaini_C1912_044.c.06116.06116.5	58	72	14	3162.52	633.512	5	-0.7	0.48	0.46	36.47
ILKGEYAVR-LGKSHIR-a3-b3	pr|PROT02|DDX1	pr|PROT02|DDX1	intra-protein xl	mfaini_C1912_043.c.01669.01669.4_mfaini_C1912_043.c.01655.01655.4	493	461	32	1995.16	499.798	4	-1.5	0.59	0.86	36.42
IASPEGQDYLKGMAAAGNYAWVNR-DKIIVNDR-a11-b2	pr|PROT01|HSPC117	pr|PROT01|HSPC117	intra-protein xl	mfaini_C1912_044.c.07615.07615.4_mfaini_C1912_044.c.07619.07619.4	308	285	23	3690.85	923.721	4	1.2	0.35	0.53	36.3
MHNQIPQVTSDGKR-KYIDNPK-a13-b1	pr|PROT02|DDX1	pr|PROT02|DDX1	intra-protein xl	mfaini_C1912_043.c.01792.01792.4_mfaini_C1912_043.c.01777.01777.4	399	311	88	2624.33	657.09	4	-3.5	0.51	0.21	36.23
KGHQFSCVCLHGDRKPHER-GKGCYNTR-a15-b2	pr|PROT02|DDX1	pr|PROT02|DDX1	intra-protein xl	mfaini_C1912_043.c.00425.00425.5_mfaini_C1912_043.c.00421.00421.5	550	636	86	3439.61	688.93	5	-2.1	0.41	0.73	36.23
NHVGKPLLKMDLNSEQAEQLER-EDLSKIIR-a9-b5	pr|PROT03|FAM98B	pr|PROT03|FAM98B	intra-protein xl	mfaini_C1912_043.c.05188.05188.4_mfaini_C1912_043.c.05171.05171.4	196	280	84	3658.93	915.741	4	-0.6	0.32	0.33	36.22
XHNQIPQVTSDGKR-DQQEGKK-a13-b6	pr|PROT02|DDX1	pr|PROT02|DDX1	intra-protein xl	mfaini_C1912_046.c.00656.00656.4_mfaini_C1912_046.c.00621.00621.4	399	75	324	2595.27	649.824	4	-2.1	0.52	0.26	36.17
VASPKLVXEEAPESYK-LRPIAVIKG-a5-b8	pr|PROT01|HSPC117	pr|PROT01|HSPC117	intra-protein xl	mfaini_C1912_044.c.04612.04612.4_mfaini_C1912_044.c.04588.04588.4	465	504	39	2896.59	725.156	4	-1.4	0.47	0.19	36.15
NLDFQDVLDKLADXGIAIR-LRPIAVIKG-a10-b8	pr|PROT01|HSPC117	pr|PROT01|HSPC117	intra-protein xl	mfaini_C1912_044.c.10840.10840.4_mfaini_C1912_044.c.10819.10819.4	451	504	53	3265.81	817.46	4	-0.2	0.39	0.41	36.1
LTQDAVAKANQTK-HYKIEDR-a8-b3	pr|PROT04|CGI-99	pr|PROT04|CGI-99	intra-protein xl	mfaini_C1912_043.c.01563.01563.3_mfaini_C1912_043.c.01541.01541.3	171	41	130	2484.29	829.106	3	-1.3	0.34	0.32	36.03
XHNQIPQVTSDGKR-KQNLER-a13-b1	pr|PROT02|DDX1	pr|PROT02|DDX1	intra-protein xl	mfaini_C1912_043.c.00993.00993.4_mfaini_C1912_043.c.00982.00982.4	399	555	156	2550.29	638.58	4	-2.9	0.43	0.84	35.83
GLGHQVATDALVAXEKAMKR-RDKIIVNDR-a16-b3	pr|PROT01|HSPC117	pr|PROT01|HSPC117	intra-protein xl	mfaini_C1912_044.c.05907.05907.4_mfaini_C1912_044.c.06455.06455.4	279	285	6	3406.81	852.71	4	-2.3	0.3	0.84	35.52
TDDVHAKDNTRPGANSPEMWSEAIK-GKGCYNTR-a7-b2	pr|PROT02|DDX1	pr|PROT02|DDX1	intra-protein xl	mfaini_C1912_044.c.02786.02786.5_mfaini_C1912_044.c.02946.02946.5	472	636	164	3860.78	773.164	5	-0.4	0.47	0.81	35.51
GHQFSCVCLHGDRKPHER-GKGCYNTR-a14-b2	pr|PROT02|DDX1	pr|PROT02|DDX1	intra-protein xl	mfaini_C1912_044.c.00493.00493.5_mfaini_C1912_044.c.00666.00666.5	550	636	86	3311.51	663.311	5	-3.4	0.34	0.61	35.39
DVNCPFKIQDR-HYKIEDR-a7-b3	pr|PROT04|CGI-99	pr|PROT04|CGI-99	intra-protein xl	mfaini_C1912_044.c.03014.03014.4_mfaini_C1912_044.c.02981.02981.4	72	41	31	2488.21	623.061	4	-1.5	0.54	0.43	35.13
NHVGKPLLK-EDLSKIIR-a5-b5	pr|PROT03|FAM98B	pr|PROT03|FAM98B	intra-protein xl	mfaini_C1912_043.c.03425.03425.3_mfaini_C1912_043.c.03393.03393.3	192	280	88	2115.24	706.087	3	-2.2	0.31	0.73	35.1
TADNATKNAEPLINLDVNNPDFK-YKDLVPDNSK-a7-b2	pr|PROT04|CGI-99	pr|PROT04|CGI-99	intra-protein xl	mfaini_C1912_043.c.06627.06627.4_mfaini_C1912_043.c.06604.06604.4	115	100	15	3828.9	958.233	4	-1.4	0.45	0.34	34.92
SHNKQFDNYGEEFTMHDTIGCYLDIDK-FGFGFGGTGKK-a4-b10	pr|PROT02|DDX1	pr|PROT02|DDX1	intra-protein xl	mfaini_C1912_044.c.07791.07791.5_mfaini_C1912_044.c.07760.07760.5	177	172	5	4516.04	904.216	5	-0.6	0.68	0.75	34.33
TGASVLNKWQMNPYDR-ATKGLMK-a8-b3	pr|PROT02|DDX1	pr|PROT02|DDX1	intra-protein xl	mfaini_C1912_043.c.05643.05643.4_mfaini_C1912_043.c.05616.05616.4	90	126	36	2764.39	692.105	4	-5.9	0.36	0.39	34.25
TDDVHAKDNTRPGANSPEMWSEAIK-ILKGEYAVR-a7-b3	pr|PROT02|DDX1	pr|PROT02|DDX1	intra-protein xl	mfaini_C1912_043.c.04219.04219.4_mfaini_C1912_043.c.04212.04212.4	472	493	21	3953.94	989.493	4	-4.9	0.38	0.3	34.08
LDDLVSTGKLNLSQVR-KQNLER-a9-b1	pr|PROT02|DDX1	pr|PROT02|DDX1	intra-protein xl	mfaini_C1912_043.c.05098.05098.4_mfaini_C1912_043.c.05079.05079.4	358	555	197	2681.47	671.375	4	-1.7	0.5	0.85	34.07
VQKNHVGKPLLK-EDLSKIIR-a3-b5	pr|PROT03|FAM98B	pr|PROT03|FAM98B	intra-protein xl	mfaini_C1912_044.c.02248.02248.3_mfaini_C1912_044.c.02229.02229.3	187	280	93	2470.46	824.496	3	-0.2	0.38	0.82	34.06
NVTDVVNTCHDAGISKK-INKNCWR-a16-b3	pr|PROT01|HSPC117	pr|PROT01|HSPC117	intra-protein xl	mfaini_C1912_043.c.03216.03216.3_mfaini_C1912_043.c.03204.03204.3	492	17	475	2984.45	995.824	3	-3.3	0.49	0.27	33.98
TTIKTGASVLNK-ATKGLXK-a4-b3	pr|PROT02|DDX1	pr|PROT02|DDX1	intra-protein xl	mfaini_C1912_044.c.01863.01863.3_mfaini_C1912_044.c.01844.01844.3	82	126	44	2133.2	712.076	3	-1.7	0.44	0.3	33.77
EKTACAINK-IYQPKR-a2-b5	pr|PROT03|FAM98B	pr|PROT03|FAM98B	intra-protein xl	mfaini_C1912_044.c.00815.00815.4_mfaini_C1912_044.c.00779.00779.4	292	256	36	1975.05	494.771	4	-2.1	0.32	0.66	33.77
EVKEWHGCR-GKGCYNTR-a3-b2	pr|PROT02|DDX1	pr|PROT02|DDX1	intra-protein xl	mfaini_C1912_046.c.00934.00934.4_mfaini_C1912_046.c.00902.00902.4	117	636	519	2292.05	574.02	4	-2.3	0.31	0.8	33.49
ILKGEYAVR-AIKEHK-a3-b3	pr|PROT02|DDX1	pr|PROT02|DDX1	intra-protein xl	mfaini_C1912_046.c.01022.01022.3_mfaini_C1912_046.c.00999.00999.3	493	502	9	1910.1	637.706	3	-1.7	0.5	0.43	33.45
VKTDDIAR-IYQPKR-a2-b5	pr|PROT03|FAM98B	pr|PROT03|FAM98B	intra-protein xl	mfaini_C1912_045.c.01461.01461.4_mfaini_C1912_045.c.01407.01407.4	245	256	11	1858.03	465.514	4	-2.5	0.46	0.42	33.42
SQHSGNAQVTQTKFLPNAPK-YIDNPKLR-a13-b6	pr|PROT02|DDX1	pr|PROT02|DDX1	intra-protein xl	mfaini_C1912_043.c.03297.03297.4_mfaini_C1912_043.c.03266.03266.4	281	317	36	3307.72	827.938	4	-3.6	0.44	0.3	33.41
SQHSGNAQVTQTKFLPNAPK-ATKGLMK-a13-b3	pr|PROT02|DDX1	pr|PROT02|DDX1	intra-protein xl	mfaini_C1912_043.c.02633.02633.5_mfaini_C1912_043.c.02584.02584.5	281	126	155	3037.59	608.526	5	-3.4	0.44	0.34	33.39
APDGYIVKSQHSGNAQVTQTK-LDDLVSTGKLNLSQVR-a8-b9	pr|PROT02|DDX1	pr|PROT02|DDX1	intra-protein xl	mfaini_C1912_046.c.05387.05387.4_mfaini_C1912_046.c.05354.05354.4	268	358	90	4123.14	1031.79	4	-3.6	0.45	0.47	33.29
SQHSGNAQVTQTKFLPNAPK-LDDLVSTGKLNLSQVR-a13-b9	pr|PROT02|DDX1	pr|PROT02|DDX1	intra-protein xl	mfaini_C1912_046.c.05976.05976.4_mfaini_C1912_046.c.05922.05922.4	281	358	77	4047.14	1012.79	4	-0.3	0.56	0.52	33.09
ILKGEYAVR-GKGCYNTR-a3-b2	pr|PROT02|DDX1	pr|PROT02|DDX1	intra-protein xl	mfaini_C1912_043.c.01925.01925.4_mfaini_C1912_043.c.01914.01914.4	493	636	143	2140.1	536.034	4	-3.2	0.38	0.37	33.03
EHKMDQAIIFCR-VTYGQKR-a3-b6	pr|PROT02|DDX1	pr|PROT02|DDX1	intra-protein xl	mfaini_C1912_043.c.03154.03154.4_mfaini_C1912_043.c.03118.03118.4	505	693	188	2535.27	634.825	4	-2.1	0.55	0.39	32.97
LDDLVSTGKLNLSQVR-TGASVLNKWQMNPYDR-a9-b8	pr|PROT02|DDX1	pr|PROT02|DDX1	intra-protein xl	mfaini_C1912_046.c.08341.08341.4_mfaini_C1912_046.c.08312.08312.4	358	90	268	3773.93	944.491	4	-1.9	0.46	0.73	32.74
FPPKDGFVALSK-GHVKFSK-a4-b4	pr|PROT02|DDX1	pr|PROT02|DDX1	intra-protein xl	mfaini_C1912_043.c.03628.03628.4_mfaini_C1912_043.c.03520.03520.4	252	204	48	2244.22	562.064	4	-3.5	0.48	0.89	32.7
LGKSHIR-VTYGQKR-a3-b6	pr|PROT02|DDX1	pr|PROT02|DDX1	intra-protein xl	mfaini_C1912_045.c.00582.00582.3_mfaini_C1912_045.c.00581.00581.3	461	693	232	1798.01	600.346	3	-4.4	0.57	0	32.64
DGFVALSKAPDGYIVK-TGASVLNKWQMNPYDR-a8-b8	pr|PROT02|DDX1	pr|PROT02|DDX1	intra-protein xl	mfaini_C1912_045.c.08607.08607.4_mfaini_C1912_045.c.08632.08632.4	260	90	170	3695.86	924.972	4	-2.1	0.45	0.8	32.61
ELAEQTLNNIKQFKK-YIDNPKLR-a11-b6	pr|PROT02|DDX1	pr|PROT02|DDX1	intra-protein xl	mfaini_C1912_044.c.05032.05032.3_mfaini_C1912_044.c.05009.05009.3	307	317	10	2958.62	987.215	3	0.9	0.34	0.36	32.44
ILKGEYAVR-VTYGQKR-a3-b6	pr|PROT02|DDX1	pr|PROT02|DDX1	intra-protein xl	mfaini_C1912_045.c.02285.02285.3_mfaini_C1912_045.c.02277.02277.3	493	693	200	2036.14	679.721	3	-0.6	0.45	0.23	32.41
TDDVHAKDNTRPGANSPEXWSEAIK-GKGCYNTR-a7-b2	pr|PROT02|DDX1	pr|PROT02|DDX1	intra-protein xl	mfaini_C1912_044.c.02395.02395.5_mfaini_C1912_044.c.02373.02373.5	472	636	164	3876.77	776.362	5	-2.1	0.34	0.26	32.33
ELAEQTLNNIKQFK-GKGCYNTR-a11-b2	pr|PROT02|DDX1	pr|PROT02|DDX1	intra-protein xl	mfaini_C1912_044.c.04895.04895.4_mfaini_C1912_044.c.04873.04873.4	307	636	329	2767.4	692.858	4	1	0.41	0.38	32.08
DGFVALSKAPDGYIVK-DQQEGKK-a8-b6	pr|PROT02|DDX1	pr|PROT02|DDX1	intra-protein xl	mfaini_C1912_046.c.05429.05429.3_mfaini_C1912_046.c.05391.05391.3	260	75	185	2648.37	883.797	3	-0.5	0.37	0.3	32.07
APDGYIVKSQHSGNAQVTQTK-YIDNPKLR-a8-b6	pr|PROT02|DDX1	pr|PROT02|DDX1	intra-protein xl	mfaini_C1912_044.c.02560.02560.4_mfaini_C1912_044.c.02538.02538.4	268	317	49	3383.75	846.945	4	0	0.56	0.46	31.98
TKIDCDNLEQYFIQQGGGPDK-LDDLVSTGKLNLSQVR-a2-b9	pr|PROT02|DDX1	pr|PROT02|DDX1	intra-protein xl	mfaini_C1912_043.c.08969.08969.4_mfaini_C1912_043.c.08950.08950.4	516	358	158	4320.16	1081.05	4	0.7	0.26	0.32	31.73
LEYGDNAEKYK-HYKIEDR-a9-b3	pr|PROT04|CGI-99	pr|PROT04|CGI-99	intra-protein xl	mfaini_C1912_045.c.02197.02197.3_mfaini_C1912_045.c.02152.02152.3	98	41	57	2426.17	809.731	3	-2.5	0.47	0.23	31.58
YKDLVPDNSK-HYKIEDR-a2-b3	pr|PROT04|CGI-99	pr|PROT04|CGI-99	intra-protein xl	mfaini_C1912_044.c.02254.02254.4_mfaini_C1912_044.c.02222.02222.4	100	41	59	2275.14	569.794	4	-2.2	0.39	0.41	31.46
DLVPDNSKTADNATK-HYKIEDR-a8-b3	pr|PROT04|CGI-99	pr|PROT04|CGI-99	intra-protein xl	mfaini_C1912_043.c.02156.02156.3_mfaini_C1912_043.c.02129.02129.3	108	41	67	2685.32	896.115	3	-1.4	0.73	0	31.25
IASPEGQDYLKGMAAAGNYAWVNR-XLQADPNKVSAR-a11-b8	pr|PROT01|HSPC117	pr|PROT01|HSPC117	intra-protein xl	mfaini_C1912_044.c.06846.06846.4_mfaini_C1912_044.c.06845.06845.4	308	206	102	4063.98	1017	4	-1.3	0.37	0.66	31.23
SQHSGNAQVTQTKFLPNAPK-TGASVLNKWQMNPYDR-a13-b8	pr|PROT02|DDX1	pr|PROT02|DDX1	intra-protein xl	mfaini_C1912_044.c.05574.05574.5_mfaini_C1912_044.c.05566.05566.5	281	90	191	4169.07	834.822	5	-1.5	0.31	0.89	31.23
FNFGEEEFKFPPKDGFVALSK-GHVKFSK-a13-b4	pr|PROT02|DDX1	pr|PROT02|DDX1	intra-protein xl	mfaini_C1912_044.c.06427.06427.4_mfaini_C1912_044.c.06406.06406.4	252	204	48	3371.72	843.938	4	-0.9	0.57	0.82	31.19
ELAEQTLNNIKQFK-KQNLER-a11-b1	pr|PROT02|DDX1	pr|PROT02|DDX1	intra-protein xl	mfaini_C1912_045.c.05285.05285.3_mfaini_C1912_045.c.05255.05255.3	307	555	248	2599.39	867.472	3	-1.7	0.38	0.88	31.16
DVNCPFKIQDR-FFEKYLR-a7-b4	pr|PROT04|CGI-99	pr|PROT04|CGI-99	intra-protein xl	mfaini_C1912_045.c.06715.06715.3_mfaini_C1912_045.c.06684.06684.3	72	62	10	2530.27	844.432	3	1.6	0.52	0.44	31
DGFVALSKAPDGYIVK-TTIKTGASVLNK-a8-b4	pr|PROT02|DDX1	pr|PROT02|DDX1	intra-protein xl	mfaini_C1912_044.c.06224.06224.3_mfaini_C1912_044.c.06215.06215.3	260	82	178	3048.67	1017.23	3	-1.5	0.35	0.24	30.94
SQHSGNAQVTQTKFLPNAPK-ATKGLXK-a13-b3	pr|PROT02|DDX1	pr|PROT02|DDX1	intra-protein xl	mfaini_C1912_044.c.01998.01998.4_mfaini_C1912_044.c.01987.01987.4	281	126	155	3053.59	764.404	4	-3.9	0.36	0.25	30.92
ALIVEPSRELAEQTLNNIKQFK-KYIDNPKLR-a19-b7	pr|PROT02|DDX1	pr|PROT02|DDX1	intra-protein xl	mfaini_C1912_045.c.07471.07471.4_mfaini_C1912_045.c.07455.07455.4	307	317	10	3824.12	957.039	4	0.8	0.53	0.37	30.55
MHNQIPQVTSDGKR-TTIKTGASVLNK-a13-b4	pr|PROT02|DDX1	pr|PROT02|DDX1	intra-protein xl	mfaini_C1912_044.c.02502.02502.5_mfaini_C1912_044.c.02492.02492.5	399	82	317	2979.58	596.923	5	-1.8	0.37	0.81	30.47
YIDNPKLR-GLMKGK-a6-b4	pr|PROT02|DDX1	pr|PROT02|DDX1	intra-protein xl	mfaini_C1912_045.c.02537.02537.4_mfaini_C1912_045.c.02495.02495.4	317	130	187	1788	448.008	4	1.1	0.54	0.74	30.42
GEDSVPDTVHHVVVPVNPKTDR-MGLAISLVATEKEK-a19-b12	pr|PROT02|DDX1	pr|PROT02|DDX1	intra-protein xl	mfaini_C1912_044.c.05525.05525.5_mfaini_C1912_044.c.05470.05470.5	451	623	172	4023.09	805.626	5	-2.4	0.33	0.62	30.11
NFIVWLEDQKIR-HYKIEDR-a10-b3	pr|PROT04|CGI-99	pr|PROT04|CGI-99	intra-protein xl	mfaini_C1912_043.c.07574.07574.3_mfaini_C1912_043.c.07554.07554.3	36	41	5	2657.39	886.805	3	-2.3	0.42	0.87	29.77
KYIDNPKLR-DQQEGKK-a7-b6	pr|PROT02|DDX1	pr|PROT02|DDX1	intra-protein xl	mfaini_C1912_045.c.00827.00827.3_mfaini_C1912_045.c.00815.00815.3	317	75	242	2115.13	706.05	3	-2.2	0.42	0.64	29.73
ILKGEYAVR-KQNLER-a3-b1	pr|PROT02|DDX1	pr|PROT02|DDX1	intra-protein xl	mfaini_C1912_046.c.02047.02047.3_mfaini_C1912_046.c.02020.02020.3	493	555	62	1972.11	658.376	3	-2.4	0.46	0.55	29.63
TDDVHAKDNTRPGANSPEXWSEAIK-LGKSHIR-a7-b3	pr|PROT02|DDX1	pr|PROT02|DDX1	intra-protein xl	mfaini_C1912_043.c.02280.02280.5_mfaini_C1912_043.c.02231.02231.5	472	461	11	3731.84	747.375	5	1.2	0.33	0.86	29.52
APDGYIVKSQHSGNAQVTQTK-KYIDNPKLR-a8-b7	pr|PROT02|DDX1	pr|PROT02|DDX1	intra-protein xl	mfaini_C1912_044.c.02132.02132.4_mfaini_C1912_044.c.02098.02098.4	268	317	49	3511.83	878.965	4	-3.4	0.47	0.51	29.49
DGFVALSKAPDGYIVK-KQNLER-a8-b1	pr|PROT02|DDX1	pr|PROT02|DDX1	intra-protein xl	mfaini_C1912_043.c.05301.05301.3_mfaini_C1912_043.c.05274.05274.3	260	555	295	2603.39	868.803	3	-3.6	0.34	0.36	29.07
MHNQIPQVTSDGKR-YIDNPKLR-a13-b6	pr|PROT02|DDX1	pr|PROT02|DDX1	intra-protein xl	mfaini_C1912_044.c.02416.02416.4_mfaini_C1912_044.c.02405.02405.4	399	317	82	2765.42	692.363	4	-3.2	0.56	0.47	29.04
YIDNPKLR-DQQEGKK-a6-b6	pr|PROT02|DDX1	pr|PROT02|DDX1	intra-protein xl	mfaini_C1912_046.c.01398.01398.4_mfaini_C1912_046.c.01377.01377.4	317	75	242	1987.04	497.768	4	2.4	0.41	0.54	28.76
DLVPDNSKTADNATK-LEYGDNAEKYK-a8-b9	pr|PROT04|CGI-99	pr|PROT04|CGI-99	intra-protein xl	mfaini_C1912_045.c.03520.03520.3_mfaini_C1912_045.c.03496.03496.3	108	98	10	3054.46	1019.16	3	-2	0.7	0.17	28.75
KGHQFSCVCLHGDR-KQNLER-a1-b1	pr|PROT02|DDX1	pr|PROT02|DDX1	intra-protein xl	mfaini_C1912_043.c.00798.00798.5_mfaini_C1912_043.c.00787.00787.5	536	555	19	2624.26	525.861	5	-2.3	0.18	0.78	28.27
ELAEQTLNNIKQFK-MHNQIPQVTSDGKR-a11-b13	pr|PROT02|DDX1	pr|PROT02|DDX1	intra-protein xl	mfaini_C1912_043.c.05143.05143.4_mfaini_C1912_043.c.05142.05142.4	307	399	92	3422.75	856.695	4	-3.3	0.39	0.42	27.74
FLPNAPKALIVEPSR-TTIKTGASVLNK-a7-b4	pr|PROT02|DDX1	pr|PROT02|DDX1	intra-protein xl	mfaini_C1912_043.c.05631.05631.4_mfaini_C1912_043.c.05594.05594.4	288	82	206	3020.72	756.188	4	-2.2	0.31	0.52	27.63
TGAFSIPVIQIVYETLKDQQEGK-MHNQIPQVTSDGKR-a17-b13	pr|PROT02|DDX1	pr|PROT02|DDX1	intra-protein xl	mfaini_C1912_044.c.09928.09928.5_mfaini_C1912_044.c.09908.09908.5	69	399	330	4311.22	863.251	5	-0.6	0.36	0.38	27.58
KGHQFSCVCLHGDR-VTYGQKR-a1-b6	pr|PROT02|DDX1	pr|PROT02|DDX1	intra-protein xl	mfaini_C1912_043.c.01049.01049.5_mfaini_C1912_043.c.01007.01007.5	536	693	157	2688.3	538.668	5	-0.1	0.7	0.3	27.48
EKTACAINK-EDLSKIIR-a2-b5	pr|PROT03|FAM98B	pr|PROT03|FAM98B	intra-protein xl	mfaini_C1912_044.c.02929.02929.3_mfaini_C1912_044.c.02889.02889.3	292	280	12	2144.15	715.724	3	-0.7	0.14	0.59	27.25
EKTACAINK-VKTDDIAR-a2-b2	pr|PROT03|FAM98B	pr|PROT03|FAM98B	intra-protein xl	mfaini_C1912_043.c.01106.01106.3_mfaini_C1912_043.c.01054.01054.3	292	245	47	2088.08	697.036	3	-2.6	0.25	0	27.08
EGYAWAEDKEHCEEYGR-MLQADPNKVSAR-a9-b8	pr|PROT01|HSPC117	pr|PROT01|HSPC117	intra-protein xl	mfaini_C1912_046.c.04433.04433.4_mfaini_C1912_046.c.04441.04441.4	190	206	16	3594.61	899.661	4	-0.5	0.51	0.33	27.06
FNFGEEEFKFPPKDGFVALSK-GHVKFSK-a9-b4	pr|PROT02|DDX1	pr|PROT02|DDX1	intra-protein xl	mfaini_C1912_046.c.07111.07111.5_mfaini_C1912_046.c.07081.07081.5	248	204	44	3371.72	675.351	5	-2	0.53	0.89	26.58
TDDVHAKDNTRPGANSPEXWSEAIK-EVKEWHGCR-a7-b3	pr|PROT02|DDX1	pr|PROT02|DDX1	intra-protein xl	mfaini_C1912_043.c.02952.02952.5_mfaini_C1912_043.c.02938.02938.5	472	117	355	4121.9	825.389	5	2	0.23	0.28	25.58
MHNQIPQVTSDGKR-VTYGQKR-a13-b6	pr|PROT02|DDX1	pr|PROT02|DDX1	intra-protein xl	mfaini_C1912_045.c.01706.01706.4_mfaini_C1912_045.c.01684.01684.4	399	693	294	2598.33	650.591	4	-1.1	0.45	0.61	25.4
STTSDIPHMLNQVESKVK-DILSKVQK-a16-b5	pr|PROT03|FAM98B	pr|PROT03|FAM98B	intra-protein xl	mfaini_C1912_043.c.07793.07793.5_mfaini_C1912_043.c.07765.07765.5	177	184	7	3080.64	617.136	5	-1.3	0.31	0.87	25.34
RNLDFQDVLDKLADMGIAIR-VASPKLVMEEAPESYK-a11-b5	pr|PROT01|HSPC117	pr|PROT01|HSPC117	intra-protein xl	mfaini_C1912_044.c.11417.11417.4_mfaini_C1912_044.c.11437.11437.4	451	465	14	4217.16	1055.3	4	-4.2	0.37	0.35	25.32
NVTDVVNTCHDAGISKK-KMGIDHK-a16-b1	pr|PROT01|HSPC117	pr|PROT01|HSPC117	intra-protein xl	mfaini_C1912_044.c.01991.01991.4_mfaini_C1912_044.c.01967.01967.4	492	245	247	2822.41	706.611	4	1.9	0.48	0.44	25.28
NLDFQDVLDKLADMGIAIR-VASPKLVMEEAPESYK-a10-b5	pr|PROT01|HSPC117	pr|PROT01|HSPC117	intra-protein xl	mfaini_C1912_044.c.12307.12307.4_mfaini_C1912_044.c.12282.12282.4	451	465	14	4061.07	1016.27	4	-0.9	0.24	0.46	24.66
LTALDYHNPAGFNCKDETEFR-DVNCPFKIQDR-a15-b7	pr|PROT04|CGI-99	pr|PROT04|CGI-99	intra-protein xl	mfaini_C1912_045.c.06304.06304.4_mfaini_C1912_045.c.06290.06290.4	20	72	52	4025.86	1007.47	4	-1.9	0.48	0.58	24.52
EDLSKIIR-IYQPKR-a5-b5	pr|PROT03|FAM98B	pr|PROT03|FAM98B	intra-protein xl	mfaini_C1912_046.c.03409.03409.3_mfaini_C1912_046.c.03384.03384.3	280	256	24	1914.09	639.036	3	-4.4	0.21	0.72	24.02
LDDLVSTGKLNLSQVR-XHNQIPQVTSDGKR-a9-b13	pr|PROT02|DDX1	pr|PROT02|DDX1	intra-protein xl	mfaini_C1912_043.c.04938.04938.5_mfaini_C1912_043.c.04924.04924.5	358	399	41	3520.83	705.174	5	-0.1	0.41	0.64	23.11
STTSDIPHXLNQVESKVK-DILSKVQK-a16-b5	pr|PROT03|FAM98B	pr|PROT03|FAM98B	intra-protein xl	mfaini_C1912_045.c.06133.06133.4_mfaini_C1912_045.c.06042.06042.4	177	184	7	3096.63	775.165	4	-3.2	0.39	0.54	22.19
NLDFQDVLDKLADXGIAIR-VASPKLVXEEAPESYK-a10-b5	pr|PROT01|HSPC117	pr|PROT01|HSPC117	intra-protein xl	mfaini_C1912_046.c.10441.10441.4_mfaini_C1912_046.c.10367.10367.4	451	465	14	4093.06	1024.27	4	-1.8	0.2	0.5	22.15
LDDLVSTGKLNLSQVR-YIDNPKLR-a9-b6	pr|PROT02|DDX1	pr|PROT02|DDX1	intra-protein xl	mfaini_C1912_044.c.06204.06204.3_mfaini_C1912_044.c.06172.06172.3	358	317	41	2912.59	971.871	3	-3	0.3	0.29	22.05
NLDFQDVLDKLADXGIAIR-VASPKLVMEEAPESYK-a10-b5	pr|PROT01|HSPC117	pr|PROT01|HSPC117	intra-protein xl	mfaini_C1912_043.c.11203.11203.4_mfaini_C1912_043.c.11163.11163.4	451	465	14	4077.06	1020.27	4	-1.4	0.32	0.66	21.68
GEDSVPDTVHHVVVPVNPKTDR-XGLAISLVATEKEK-a19-b12	pr|PROT02|DDX1	pr|PROT02|DDX1	intra-protein xl	mfaini_C1912_046.c.05388.05388.4_mfaini_C1912_046.c.05358.05358.4	451	623	172	4039.08	1010.78	4	-3.2	0.51	0.54	21.46
STTSDIPHMLNQVESKVK-EDLSKIIR-a16-b5	pr|PROT03|FAM98B	pr|PROT03|FAM98B	intra-protein xl	mfaini_C1912_045.c.08680.08680.4_mfaini_C1912_045.c.08635.08635.4	177	280	103	3123.64	781.918	4	-2.1	0.36	0.81	20.9

## Sheet: Legend
Description of the column headers
Id	Assigned peptides and cross-linking sites within the peptide sequences. The longer peptide is designated as (a)lpha, the shorter as (b)eta.
Protein1	SwissProt/UniProt accession number and identifier of the protein 1 (containing peptide desginated as alpha).
Protein2	SwissProt/UniProt accession number and identifier of the protein 2 (containing peptide desginated as beta).
XLType	Intra- or inter-protein, sometimes also ambiguous.
Spectrum	References the actual MS/MS spectra that were used for the assignment.
AbsPos1	Position in the protein sequence of protein 1.
AbsPos2	Position in the protein sequence of protein 2.
deltaAA	Distance in the primary sequence (makes only sense for intra-proteins cross-links).
Mr	Molecular mass calculated from experimental m/z and z (neutral mass).
Mz	Experimentally observed mass-to-charge ratio of the precursor ion in Da.
z	Experimentally observed precursor charge.
Error [ppm]	Deviation between experimental and theoretical mass in ppm.
TIC	Fraction of the total ion current covered by assigned fragment ions.
delta score	Relative score for the top hit in relation to the second best hit for this spectrum, calculated as Id-score of 2nd best hit divided by Id-score of best hit. "0" means no second best hit exists.
Id-score	Identification score as assigned by xQuest. The higher, the better.
X in the peptide sequence represents oxidized methionine
Z at the start of the peptide sequence means that the cross-link is at the protein's N terminus
Residues are numbered according to the wild-type sequences of the proteins, with negative position values corresponding to a remnant of an N-terminal tag.
