# Supplementary material for: Molecular architecture of the human tRNA ligase complex
Source: eLife. 2021 Dec 2;10:e71656. doi: 10.7554/eLife.71656 (PMC8668186; doi:10.7554/eLife.71656)
Supplement: Figure 4—source data 1. [file elife-71656-fig4-data1.xlsx]

## Sheet: Sheet1
	Figure 4 – source data 1. Mass spectrometry analysis of protein fragments resulting from limited proteolysis of RTCB:DDX1(436-740):FAM98B:CGI-99.
	Observed mass (Da)	Assigned fragment	Predicted mass (Da) of assigned fragment
	Untreated RTCB:DDX1(436-740):FAM98B:CGI-99
	55118	RTCB (Ser2-Gly505), N-acetylated	55121.1
	35259.5	(Ser-Asn-Ala)-FAM98B (Arg2-Ser314)	35261.4
	34816.5	(Ser-Asn-Ala)-DDX1 (Ser436-Phe740)	34819.3
	28109	CGI-99 (Met1-Arg244), N-acetylated	28109.8
	Peak A of limited proteolysis
	47586	RTCB (Ser2-Arg436), N-acetylated	47589.3
	39416.5	unidentified
	32279	FAM98B (Gly3-Arg290)	32280
	13675.5	CGI-99 (Asn116-Arg238)	13675.6
	13139.5	CGI-99 (Met1-Lys108), N-acetylated	13139
	Peak B of limited proteolysis
	29875	(Ser-Asn-Ala)-DDX1 (Ser436-Arg694)	29876.7
	29462.5	unidentified
	29042.5	(Ser-Asn-Ala)-DDX1 (Ser436-Lys687)	29043.8
	13139	CGI-99 (Met1-Lys108), N-acetylated	13139
	* (Ser-Asn-Ala) denotes scar from the cleaved-off affinity tag
